# Supplementary material for: National tuberculosis spending efficiency and its associated factors in 121 low-income and middle-income countries, 2010–19: a data envelopment and stochastic frontier analysis
Source: PubMed Central journal article supplement (PMC9023749; doi:10.1016/s2214-109x(22)00085-7), 2022-04-12
Supplement: mmc1.pdf [file mmc1.pdf]

# THE LANCET

## Global Health

### Supplementary appendix

This appendix formed part of the original submission and has been peer reviewed. We post it as supplied by the authors.

Supplement to: Abou Jaoude GJ, Garcia Baena I, Nguhiu P, et al. National tuberculosis spending efficiency and its associated factors in 121 low-income and middle-income countries, 2010–19: a data envelopment and stochastic frontier analysis. *Lancet Glob Health* 2022; **10**: e649–60.

Table S1. Expected effect of independent variables on overall efficiency and justification for inclusion in the analysis

Table S2. Missing data by year and country for SDG independent variables

Table S3. Multicollinearity test, variance inflation factor (VIF) for included independent variables

Table S4. Full results with DEA (variable and constant returns to scale) scores, bias estimates and bias-corrected efficiency scores, scale efficiency and SFA efficiency scores

Table S5. Sub-regional DEA analysis regression results

Figure S1a. Scatter plots of 1209 bias-corrected efficiency scores against the original DEA efficiency scores

Figure S1b. Scatter plot of 1209 DEA bias-corrected efficiency scores against the main SFA efficiency scores

Figure S2a. Graph of average DEA bias-corrected efficiency score by World Bank income group over time: 2010-2019

Figure S2b. Graph of average SFA efficiency score by World Bank income group over time: 2010-2019

Figure S2c. Graph of average DEA bias-corrected efficiency score by WHO region over time: 2010-2019

Figure S2d. Graph of average SFA efficiency score by WHO region over time: 2010-2019

Figure S3. Graph of country rankings by model, relative to main DEA model results

Figure S4. Sensitivity analysis: average efficiency scores of 14 alternative models compared with the main model

Figure S5a. Graph of average log of input and output by country: 2010-2019

Figure S5b. Graph of average log of input and three outcome-adjusted coverage outputs by country: 2010-2019

Figures S6. Average DEA and SFA efficiency scores by country between 2010-2019

Figures S7a-S7n. Descriptive plots of independent variables against DEA and SFA efficiency scores

Figures S8a-8e. Main versus sub-regional DEA analyses average scores and rankings

**Table S1. Expected effect of independent variables on overall efficiency and justification for inclusion in the analysis**

| <b>Independent variable</b>                                                                        | <b>Expected effect</b> | <b>Justification</b>                                                                                                                                                                                                                                                                                                                                                                                                                                                                                                                                                                                                                                                                                                                                                                                                                                                                           | <b>Data source</b>                   |
|----------------------------------------------------------------------------------------------------|------------------------|------------------------------------------------------------------------------------------------------------------------------------------------------------------------------------------------------------------------------------------------------------------------------------------------------------------------------------------------------------------------------------------------------------------------------------------------------------------------------------------------------------------------------------------------------------------------------------------------------------------------------------------------------------------------------------------------------------------------------------------------------------------------------------------------------------------------------------------------------------------------------------------------|--------------------------------------|
| Typical number of visits to a health facility after diagnosis for DS-TB treatment                  | -                      | A higher number of health facility visits indicates prioritising health facility delivery of direct-observed treatment care over community or hospital care, as well as longer treatment durations which are more costly. Longer treatment durations and higher numbers of required health facility visits could also increase loss to follow-up and lower treatment completion rates. Efficiency scores are therefore expected to decrease as the number of visits increases beyond a certain point.                                                                                                                                                                                                                                                                                                                                                                                          | WHO Global TB Report series data [1] |
| Typical number of visits to a health facility after diagnosis for MDR-TB treatment                 | -                      |                                                                                                                                                                                                                                                                                                                                                                                                                                                                                                                                                                                                                                                                                                                                                                                                                                                                                                |                                      |
| Estimated percentage of DS-TB cases that are hospitalised                                          | + or -                 | Some DS-TB cases may require hospitalisation given underlying comorbidities or potential adverse treatment effects. A small percentage of hospitalisation therefore likely indicates good quality care that reduces the likelihood of treatment failure – thus raising efficiency scores. However, excessive hospitalisation could in turn be unnecessary, lead to nosocomial transmission and result in lower efficiency scores due to the higher costs of tertiary care.                                                                                                                                                                                                                                                                                                                                                                                                                     | WHO Global TB Report series data [1] |
| Estimated percentage of MDR-TB cases that are hospitalised                                         | +                      | The majority of MDR-TB cases will need some hospitalisation in initial treatment phase or in the presence of complications. Higher percentages of MDR-TB hospitalisation can indicate good quality care that could identify and minimise adverse effects and monitor initial responses to drug regimens. This reduces the likelihood of treatment failure due to inappropriate drug regimens and thus should raise efficiency scores.                                                                                                                                                                                                                                                                                                                                                                                                                                                          | WHO Global TB Report series data [1] |
| Estimated average duration of stay for DS-TB cases if they are hospitalised                        | -                      | It is expected that as the duration of hospitalisation increases, efficiency will decrease given that hospitalisation is more costly than primary care with similar outcomes and it is not recommended in the case of DS-TB cases.                                                                                                                                                                                                                                                                                                                                                                                                                                                                                                                                                                                                                                                             | WHO Global TB Report series data [1] |
| Estimated average duration of stay for MDR cases if they are hospitalised                          | -                      | While hospitalisation is often necessary for MDR-TB cases, it is usually only necessary in the initial phase and for a few weeks. It is therefore expected that as the duration of hospitalisation increases, efficiency will decrease given that hospitalisation is more costly than primary care with similar outcomes.                                                                                                                                                                                                                                                                                                                                                                                                                                                                                                                                                                      | WHO Global TB Report series data [1] |
| TB spending accounted for by external sources (% of total TB spending, excluding private spending) | + or -                 | Development assistance and external funding for TB could improve efficiency with health systems support, such as higher quality and lower drug prices via cheaper procurement lines and technical support for strengthening surveillance and TB response. External funding for TB has played a major role [1] in effectively complementing government budgets. However, given that external TB funding often complements government budgets to address resource gaps, higher levels of external funding also reflect under-resourced health systems with lower overall capacity. Aid dependent countries face challenges: limited predictability of donor funds, disconnect between pledges and disbursement timings, donor conditionalities. Aid dependency also might also provoke fragmentation and limited use of aid modalities for broader government support and pooled sector funding. | WHO Global TB Report series data [1] |
| Average of six World Governance Indicators                                                         | +                      | Zeng and colleagues included several World Bank governance indicators in their efficiency analysis of HIV spending.[21] Good governance is expected to be associated with improved efficiency.[22] For this analysis, scores for each of the six World Bank governance indicators (Voice and Accountability, Political Stability and Absence of Violence, Government Effectiveness, Regulatory Quality, Rule of Law, and Control of Corruption) were highly correlated and therefore combined to generate an average as done by Jordi and colleagues in their efficiency analysis of spending on UHC.[22]                                                                                                                                                                                                                                                                                      | World Bank [2]                       |
| Population total                                                                                   | +                      | As population increases, economies of scale could improve overall efficiency.                                                                                                                                                                                                                                                                                                                                                                                                                                                                                                                                                                                                                                                                                                                                                                                                                  | World Bank Open Database [3]         |
| Population per km2                                                                                 | + or -                 | More densely populated areas are less costly to reach. A higher population density suggests higher levels of urbanisation and increased likelihood of household access to health facilities. However, higher                                                                                                                                                                                                                                                                                                                                                                                                                                                                                                                                                                                                                                                                                   | World Bank Open Database [3]         |

|                                                                       |        |                                                                                                                                                                                                                                                                                                                                                                                                                                                                                                                                                                                                                                                                                                                                               |                                                |
|-----------------------------------------------------------------------|--------|-----------------------------------------------------------------------------------------------------------------------------------------------------------------------------------------------------------------------------------------------------------------------------------------------------------------------------------------------------------------------------------------------------------------------------------------------------------------------------------------------------------------------------------------------------------------------------------------------------------------------------------------------------------------------------------------------------------------------------------------------|------------------------------------------------|
| Rural population (% of total population)                              | -      | <p>population density may also reflect crowding and an increased probability of TB transmission.</p> <p>Rural areas tend to have a lower density of health workers and fewer health facilities that receive less funding than in urban areas and are further away from catchment populations. These can result in lower treatment coverage and poorer TB care. Efficiency is therefore expected to decrease as rurality increases.</p>                                                                                                                                                                                                                                                                                                        | World Bank Open Database [3]                   |
| Current health expenditure (% of GDP)                                 | +      | <p>The percentage of GDP allocated to health can reflect government commitment to health. Governments that prioritise and focus on health are more likely to achieve high levels of efficiency.</p>                                                                                                                                                                                                                                                                                                                                                                                                                                                                                                                                           | World Bank Open Database [3]                   |
| Current health expenditure per capita, PPP (current international \$) | +      | <p>Higher levels of per capita spending on health indicates better resourced health systems that can adopt more efficient practices with resources available for investments in health infrastructure and technology. CHE per capita was also significantly correlated with Gross National Income (GNI) per capita expressed in international dollars (<math>0.81, p&lt;0.001</math>). A higher GNI per capita suggests higher levels of development and living standards.</p>                                                                                                                                                                                                                                                                | World Bank Open Database [3]                   |
| External health expenditure (% of CHE)                                | -      | <p>Higher levels of external health spending mean a greater overall dependence of health systems on development assistance, indicating lower capacity to provide services. In addition, external health spending can also compete with existing national priorities and objectives. The latter could lead to fragmentation in the health system and result in higher levels of inefficiency.</p>                                                                                                                                                                                                                                                                                                                                              | World Bank Open Database [3]                   |
| Out-of-pocket expenditure (% of CHE)                                  | -      | <p>Higher proportions of overall health spending comprised of OOP, indicate underdeveloped health financing structures. The latter are not only associated with financial barriers to accessing care, but also the quality and availability of health services. As the most regressive form of health financing, higher proportions of OOP spending are expected to result in lower efficiency.</p>                                                                                                                                                                                                                                                                                                                                           | World Bank Open Database [3]                   |
| UHC service coverage index                                            | +      | <p>A higher UHC service coverage index, reflects progress toward UHC through a greater coverage of and access to essential healthcare services at a national level. Efficiency scores are therefore expected to increase as the UHC index increases, given that progress toward UHC will likely be associated with better outcomes of TB care and efficient national planning, implementation and provision of care. The UHC service coverage index was also significantly correlated both with the Human Development Index (<math>\rho=0.85, p&lt;0.001</math>) and Gross National Income per capita in international dollars (<math>\rho=0.69, p&lt;0.001</math>), which were therefore not included as separate independent variables.</p> | WHO Global Health Observatory [4]              |
| TB incidence per 100k population                                      | + or - | <p>High incidence of TB can be an indicator of poor outcomes, such as low treatment coverage (if the number of missing cases is large), which would result in lower efficiency scores. However, other social and environmental factors such as poverty are significant drivers of TB incidence. Higher TB incidence could allow for economies of scale, thus lowering costs and resulting in higher efficiency scores if programmatic outcomes are not poor. For example, Zeng and colleagues found a significant positive association between HIV prevalence and the efficiency of HIV spending.[21]</p>                                                                                                                                     | WHO Global Health Observatory [4]              |
| MDR-TB incidence per 100k population                                  | -      | <p>Efficiency scores are expected to decrease as MDR-TB incidence increases given that higher rates of drug-resistance may be indicators of poor diagnosis and treatment outcomes. In addition, diagnosis and treatment outcomes for MDR-TB tend to be inferior and costlier compared with care for DS-TB.</p>                                                                                                                                                                                                                                                                                                                                                                                                                                | WHO Global Health Observatory [4]              |
| HIV prevalence (adults 15-49)                                         | -      | <p>Higher HIV prevalence increases population susceptibility to TB and therefore the likelihood of high HIV-TB comorbidity. HIV-TB comorbidity requires integrated approaches to the management of care and disease control. Integrated approaches to comorbidity management are often lacking or recently implemented, leading to poorer outcomes, and as such efficiency is expected to decrease as HIV prevalence increases.</p>                                                                                                                                                                                                                                                                                                           | Joint United Nations Programme on HIV/AIDS [5] |

|                                                                               |        |                                                                                                                                                                                                                                                                                                                                                                                                                                                                                                                                                                                                                                                                                                                                                                 |                                   |
|-------------------------------------------------------------------------------|--------|-----------------------------------------------------------------------------------------------------------------------------------------------------------------------------------------------------------------------------------------------------------------------------------------------------------------------------------------------------------------------------------------------------------------------------------------------------------------------------------------------------------------------------------------------------------------------------------------------------------------------------------------------------------------------------------------------------------------------------------------------------------------|-----------------------------------|
| Population living in slums (% of urban population)                            | -      |                                                                                                                                                                                                                                                                                                                                                                                                                                                                                                                                                                                                                                                                                                                                                                 | UN SDG database [6]               |
| Diabetes prevalence (% of population aged >= 18 years)                        | + or - | These are the “SDG indicators beyond SDG 3 that are associated with TB incidence” included in the WHO TB report 2020.[1] Each of these six indicators affects TB incidence and consequently the denominator of the treatment coverage variable used as an output in the main model. The six SDG indicators (population living in slums, diabetes prevalence, alcohol use disorders, GINI index, population living in poverty and prevalence of undernourishment) are therefore expected to have a negative association with the overall efficiency of TB spending. However, a positive association may be observed with diabetes prevalence or the GINI index as both may increase with GDP and countries with higher GDP may have higher levels of efficiency. | WHO Global Health Observatory [4] |
| Alcohol use disorders, 12-month prevalence (% of population aged >= 15 years) | -      |                                                                                                                                                                                                                                                                                                                                                                                                                                                                                                                                                                                                                                                                                                                                                                 | WHO Global Health Observatory [4] |
| GINI index (0=perfect equality, 100=perfect inequality)                       | + or - |                                                                                                                                                                                                                                                                                                                                                                                                                                                                                                                                                                                                                                                                                                                                                                 | World Bank Open Database [3]      |
| Population living below the international poverty line (% of population)      | -      |                                                                                                                                                                                                                                                                                                                                                                                                                                                                                                                                                                                                                                                                                                                                                                 | UN SDG database [6]               |
| Prevalence of undernourishment (% of population)                              | -      |                                                                                                                                                                                                                                                                                                                                                                                                                                                                                                                                                                                                                                                                                                                                                                 | World Bank Open Database [3]      |
|                                                                               | -      |                                                                                                                                                                                                                                                                                                                                                                                                                                                                                                                                                                                                                                                                                                                                                                 |                                   |

Note: GDP: Gross Domestic Product, CHE: Current Health Expenditure, UHC: Universal Health Coverage

[1] World Health Organisation. WHO estimates published in Global TB Report series. World Health Organisation; 2020.

[2] World Bank. Worldwide Governance Indicators [Internet]. The World Bank. 2020 [Accessed: 20 October 2020]. Available from: <https://info.worldbank.org/governance/wgi/>.

[3] World Bank. World Bank Open Data [Internet]. World Bank. 2020 [Accessed: 20 October 2020]. Available from: <https://data.worldbank.org/>.

[4] World Health Organisation. Global Health Observatory Data [Internet]. World Health Organisation. 2020 [Accessed: 20 October 2020]. Available from: [apps.who.int/gho/data/](https://apps.who.int/gho/data/).

[5] UNAIDS. AIDInfo [Internet]. UNAIDS. 2020 [Accessed: 20 October 2020]. Available from: <https://aidsinfo.unaids.org/>

[6] United Nations. Global SDG Indicators Database [Internet]. United Nations. 2020 [Accessed: 20 October 2020]. Available from: <https://unstats.un.org/sdgs/indicators/database/>.

**Table S2. Missing data by year and country for SDG independent variables**

| <b>Variable</b>                                                                                | <b>Country</b> | <b>Year</b> | <b>Imputation method</b>                                                                                             | <b>Included in final model</b> | <b>Reason for exclusion</b>                       |
|------------------------------------------------------------------------------------------------|----------------|-------------|----------------------------------------------------------------------------------------------------------------------|--------------------------------|---------------------------------------------------|
| Access to clean fuels and technologies for cooking (% of population)                           | 2·48%          | 31·8%       | Ordinary least squares                                                                                               | No                             | Highly correlated with UHC index (0·819, p<0·001) |
| Population living in slums (% of urban population)                                             | 17·4%          | 80·1%       | Ordinary least squares                                                                                               | Yes                            | n/a                                               |
| Smoking prevalence (% of population aged >= 15 years)                                          | 28·9%          | 64·4%       | n/a                                                                                                                  | No                             | Data missing for too many countries               |
| Diabetes prevalence (% of population aged >= 18 years)                                         | 1·65%          | 50·7%       | Ordinary least squares                                                                                               | Yes                            | n/a                                               |
| Population covered by social protection floors/systems (% of population)                       | 39·7%          | 87·3%       | n/a                                                                                                                  | No                             | Data missing for too many countries               |
| Alcohol use disorders, 12 month prevalence (% of population aged >= 15 years)                  | 2·5%           | 90·2%       | Assumed fixed over time (i.e. applied 2016 values to all years)                                                      | Yes                            | n/a                                               |
| GINI index (0=perfect equality, 100=perfect inequality)                                        | 17·4%          | 72·0%       | Ordinary least squares                                                                                               | Yes                            | n/a                                               |
| Population living below the international poverty line (% of population)                       | 17·4%          | 72·0%       | Ordinary least squares                                                                                               | Yes                            | n/a                                               |
| Prevalence of undernourishment (% of population)                                               | 14·9%          | 32·0%       | Ordinary least squares                                                                                               | Yes                            | n/a                                               |
| UHC index of essential service coverage (based on 14 tracer indicators including TB treatment) | 3·31%          | 80·8%       | Assumed fixed over time (i.e. applied 2015 and 2017 values to years before and after, along with average in between) | Yes                            | n/a                                               |
| Greater than 10% of total household expenditure or income on health (% of population)          | 41·4%          | 85·8%       | n/a                                                                                                                  | No                             | Data missing for too many countries               |
| Greater than 25% of total household expenditure or income on health (% of population)          | 41·4%          | 85·8%       | n/a                                                                                                                  | No                             | Data missing for too many countries               |

**Table S3. Multicollinearity test, variance inflation factor (VIF) for included independent variables**

| <b>Variable (n=25)</b>                                                                             | <b>VIF</b>  | <b>SQRT VIF</b> | <b>Tolerance</b> | <b>R-Squared</b> |
|----------------------------------------------------------------------------------------------------|-------------|-----------------|------------------|------------------|
| Typical number of visits to a health facility after diagnosis for DS-TB treatment                  | 1.57        | 1.25            | 0.64             | 0.36             |
| Typical number of visits to a health facility after diagnosis for MDR-TB treatment                 | 1.56        | 1.25            | 0.64             | 0.36             |
| Estimated percentage of DS-TB cases that are hospitalised                                          | 2.47        | 1.57            | 0.40             | 0.60             |
| Estimated percentage of MDR-TB cases that are hospitalised                                         | 1.49        | 1.22            | 0.67             | 0.33             |
| Estimated average duration of stay for DS-TB cases if they are hospitalised                        | 2.32        | 1.52            | 0.43             | 0.57             |
| Estimated average duration of stay for MDR cases if they are hospitalised                          | 1.77        | 1.33            | 0.56             | 0.44             |
| Governance indicator                                                                               | 2.73        | 1.65            | 0.37             | 0.63             |
| Current health expenditure per capita, PPP (current international \$)                              | 3.84        | 1.96            | 0.26             | 0.74             |
| Current health expenditure (% of GDP)                                                              | 1.90        | 1.38            | 0.53             | 0.47             |
| External health expenditure (% of CHE)                                                             | 3.35        | 1.83            | 0.30             | 0.70             |
| Out-of-pocket expenditure (% of CHE)                                                               | 2.47        | 1.57            | 0.40             | 0.60             |
| Population total (log)                                                                             | 2.47        | 1.57            | 0.40             | 0.60             |
| Population per km2                                                                                 | 1.19        | 1.09            | 0.84             | 0.16             |
| Rural population (% of total population)                                                           | 2.14        | 1.46            | 0.47             | 0.53             |
| TB spending accounted for by external sources (% of total TB spending, excluding private spending) | 2.02        | 1.42            | 0.49             | 0.51             |
| TB incidence per 100k                                                                              | 2.19        | 1.48            | 0.46             | 0.54             |
| MDR-TB incidence per 100k                                                                          | 1.98        | 1.41            | 0.50             | 0.50             |
| UHC service coverage index                                                                         | 5.23        | 2.29            | 0.19             | 0.81             |
| Population living in slums (% of urban population)                                                 | 3.11        | 1.76            | 0.32             | 0.68             |
| Diabetes prevalence (% of population aged >= 18 years)                                             | 2.11        | 1.45            | 0.47             | 0.53             |
| Alcohol use disorders, 12 month prevalence (% of population aged >= 15 years)                      | 1.63        | 1.27            | 0.62             | 0.38             |
| GINI index (0=perfect equality, 100=perfect inequality)                                            | 1.98        | 1.41            | 0.51             | 0.49             |
| Population living below the international poverty line (% of population)                           | 4.54        | 2.13            | 0.22             | 0.78             |
| Prevalence of undernourishment (% of population)                                                   | 2.71        | 1.65            | 0.37             | 0.63             |
| HIV prevalence (adults 15-49)                                                                      | 3.09        | 1.76            | 0.32             | 0.68             |
| <b>Mean VIF</b>                                                                                    | <b>2.48</b> |                 |                  |                  |

**Figure S1a. Scatter plot of 1209 bias-corrected efficiency scores against the original DEA efficiency scores**

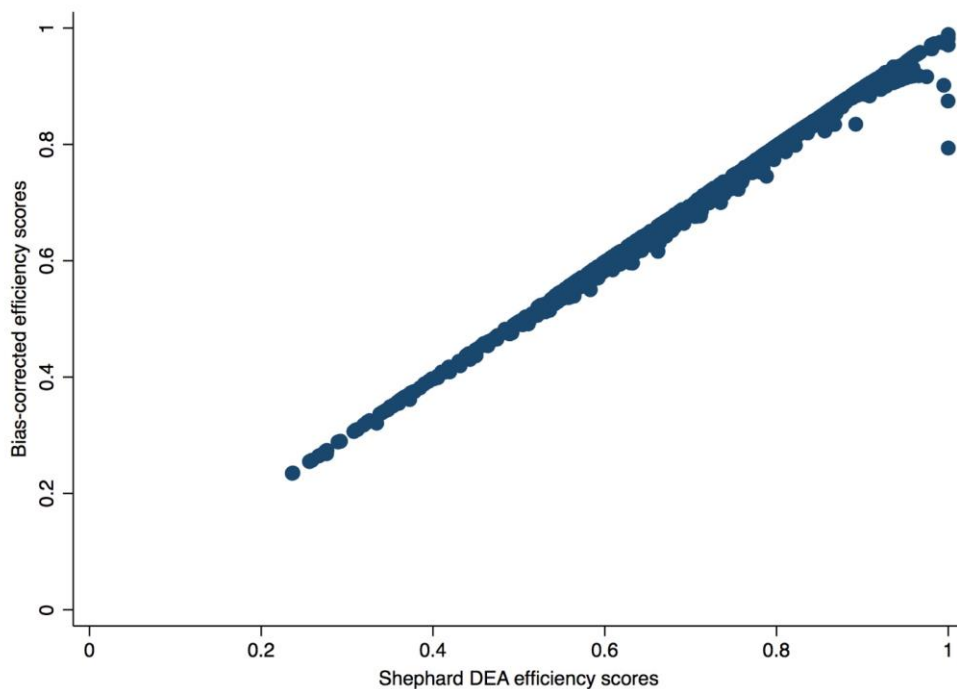

The correlation coefficient between the original Shepard DEA efficiency scores and the bias-corrected efficiency scores is 0.998 ( $p < 0.001$ ) for 1209 observations.

**Figure S1b. Scatter plot of 1209 DEA bias-corrected efficiency scores against the main SFA efficiency scores**

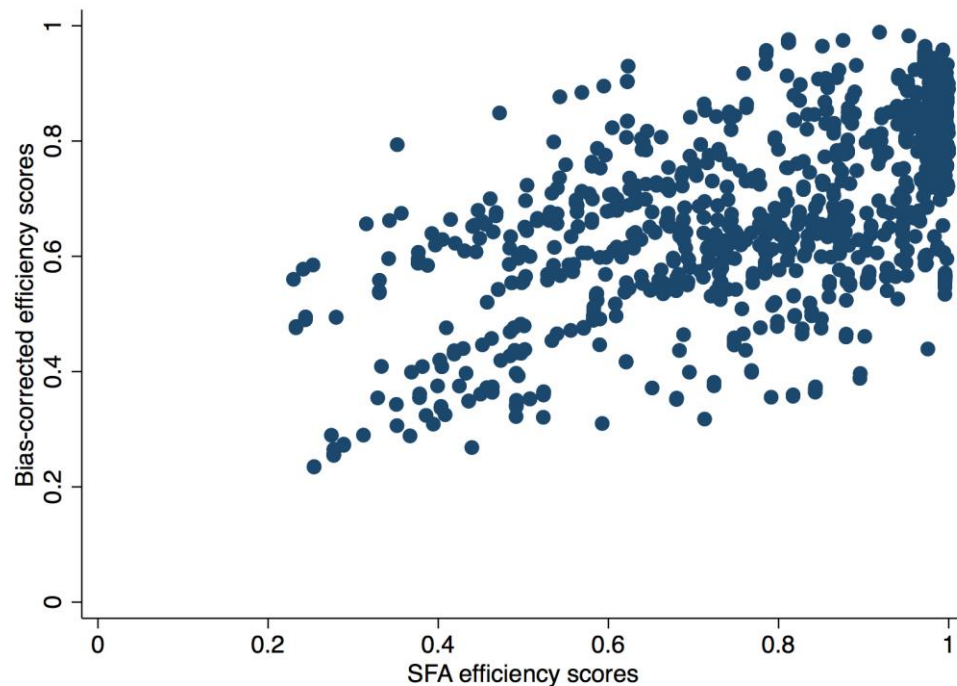

The correlation coefficient between the DEA bias-corrected efficiency scores and main SFA efficiency scores is 0.6584 ( $p < 0.001$ ) for 1209 observations.



Figure S2a. Graph of average DEA bias-corrected efficiency score by World Bank income group over time: 2010-2019

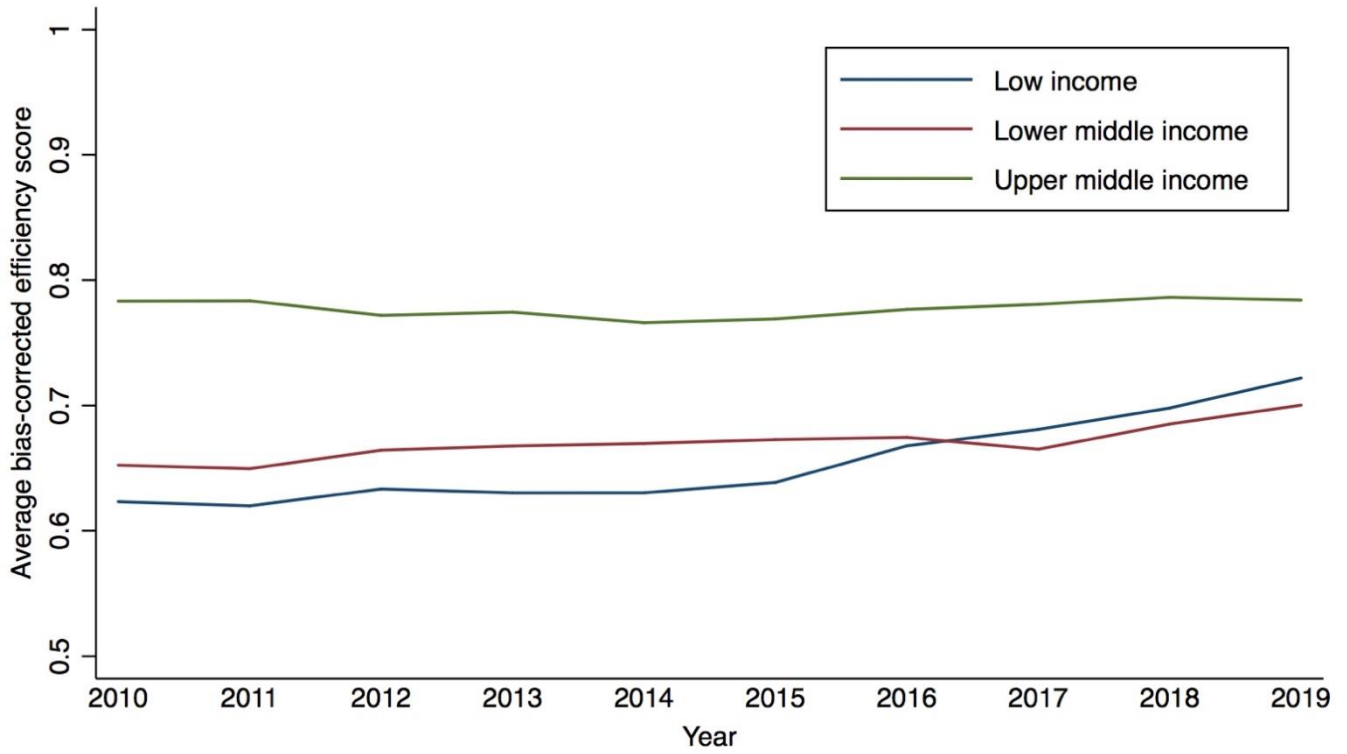

Figure S2b. Graph of average SFA efficiency score by World Bank income group over time: 2010-2019

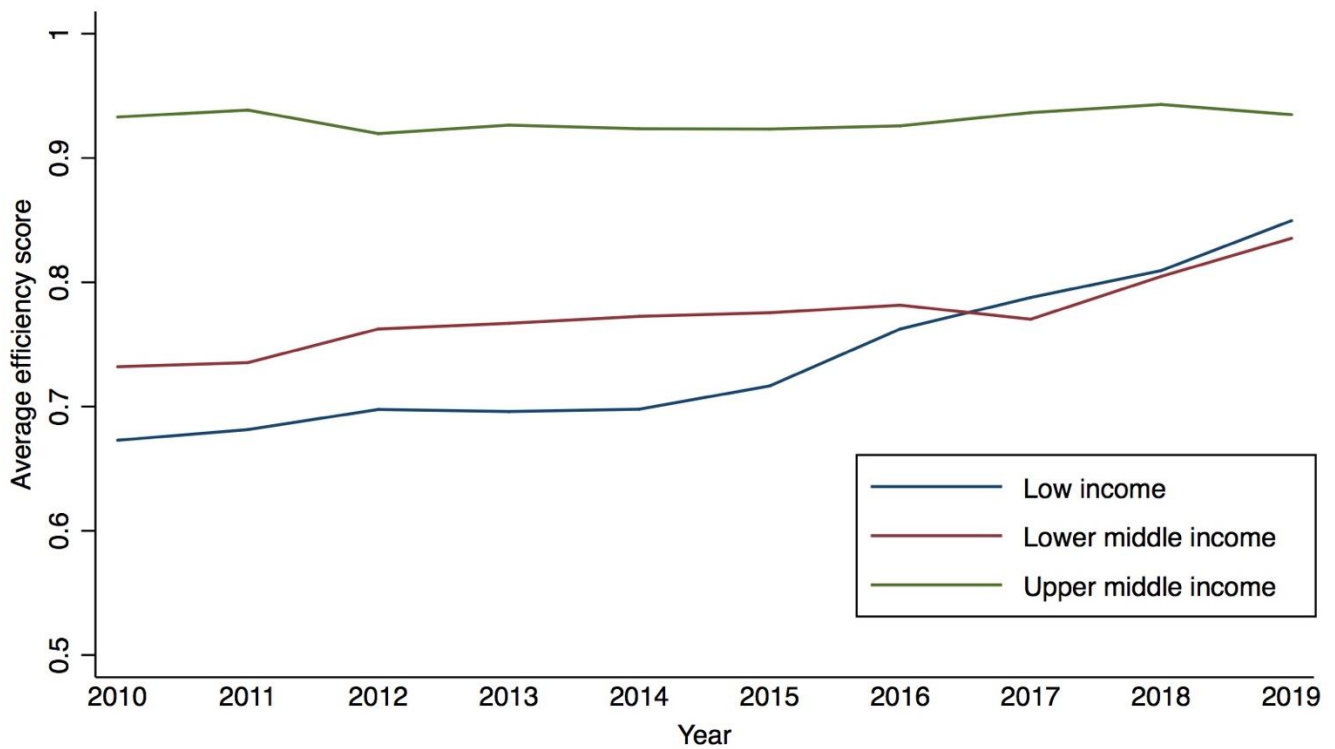

Figure S2c. Graph of average DEA bias-corrected efficiency score by WHO region over time: 2010-2019

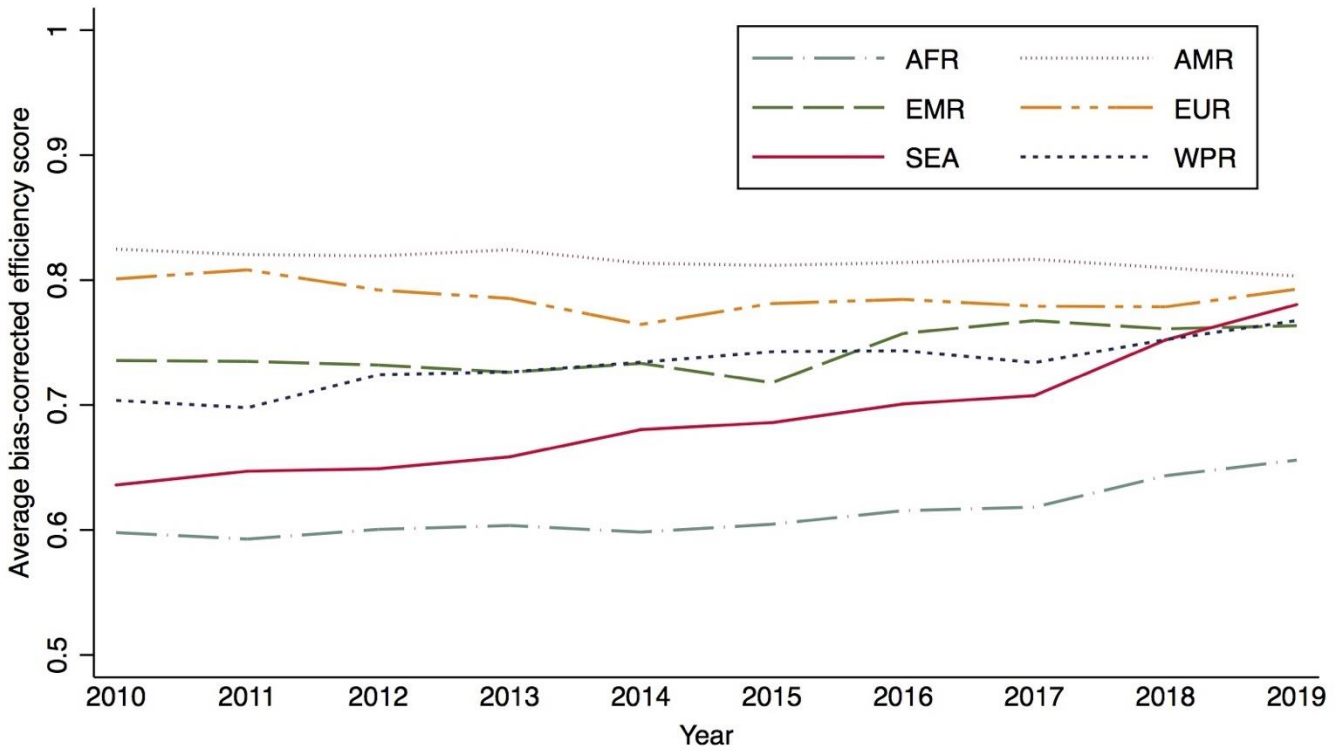

Figure S2d. Graph of average SFA efficiency score by WHO region over time: 2010-2019

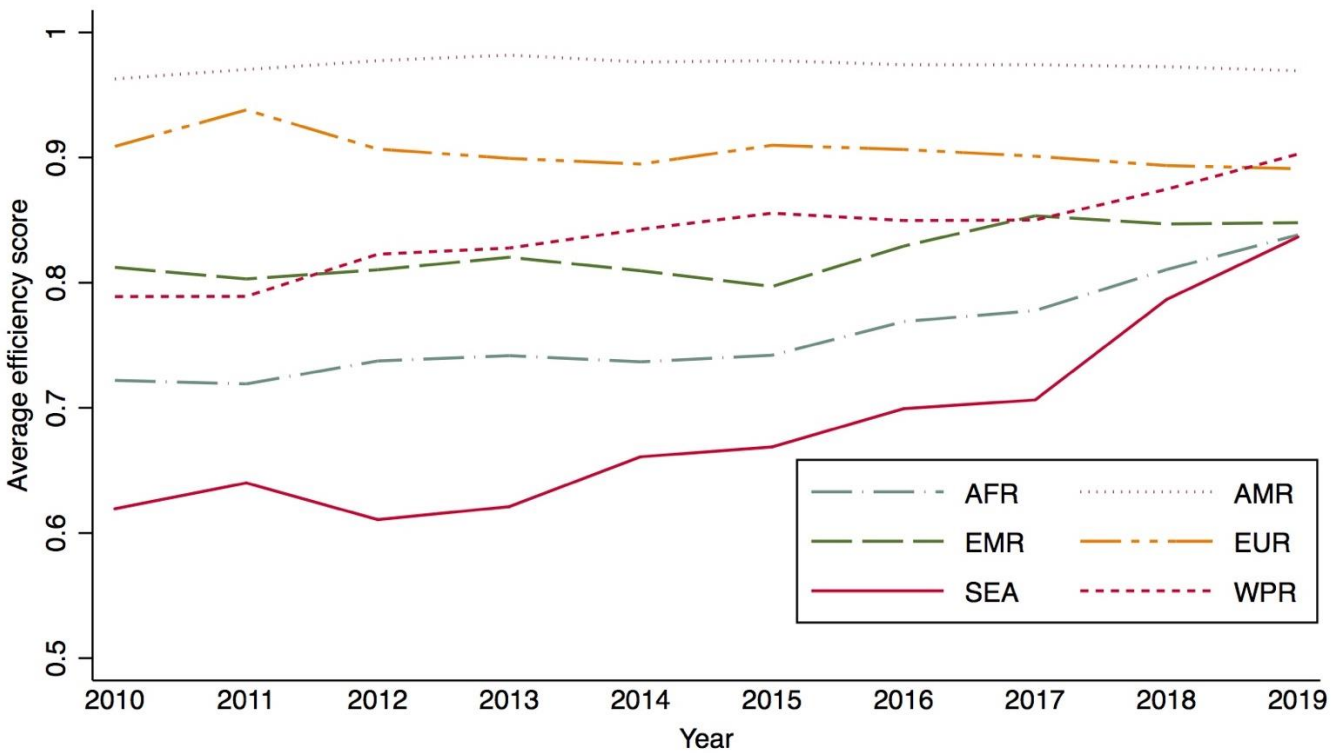

Figure S3. Graph of country rankings by model, relative to main DEA model results

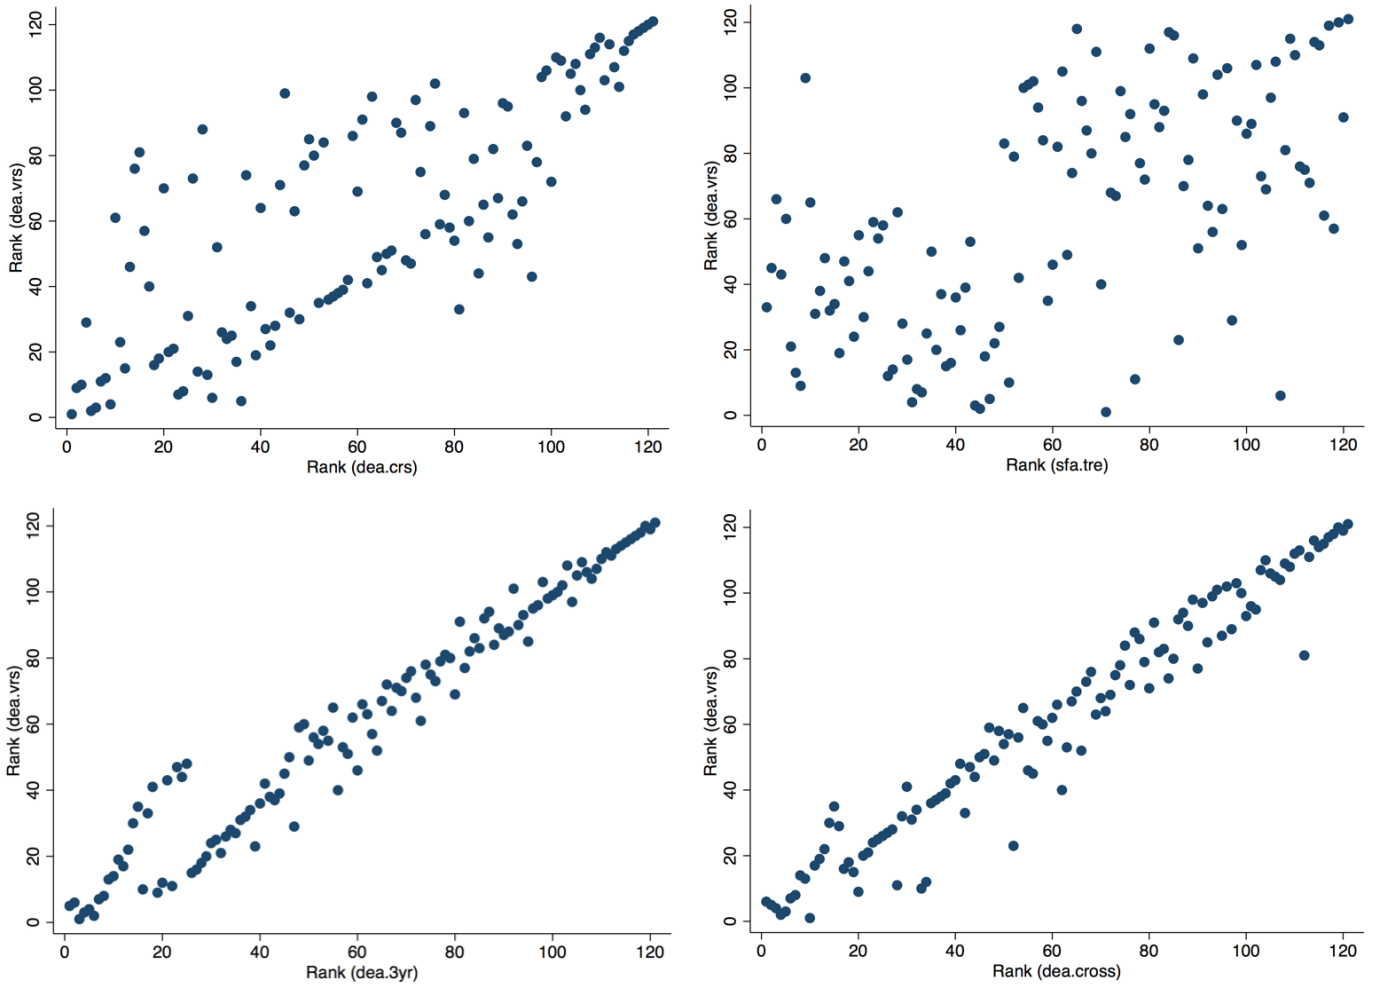

Note: dea.vrs = main DEA model, sfa.tre = SFA model, dea.3yr = 3-year lagged investment DEA model, dea.cross = cross-sectional DEA model using 10 year average for all variables.

**Table S4. Full results with DEA (variable and constant returns to scale) scores, bias estimates and bias-corrected efficiency scores, scale efficiency and SFA efficiency scores**

| Country        | iso3 | Year | WHO Region | WB Income Group | DEA Score (VRS) | Bias estimate (VRS) | Bias-corrected DEA score (VRS) | SFA efficiency score | DEA Score (CRS) | Bias estimate (CRS) | Bias-corrected DEA score (CRS) | Scale efficiency (CRS/VRS) |
|----------------|------|------|------------|-----------------|-----------------|---------------------|--------------------------------|----------------------|-----------------|---------------------|--------------------------------|----------------------------|
| Afghanistan    | AFG  | 2010 | EMR        | LIC             | 57.55           | 1.03                | 56.52                          | 50.27                | 49.67           | 3.21                | 46.46                          | 82.20                      |
| Afghanistan    | AFG  | 2011 | EMR        | LIC             | 55.46           | 1.23                | 54.23                          | 47.05                | 48.52           | 3.14                | 45.39                          | 83.70                      |
| Afghanistan    | AFG  | 2012 | EMR        | LIC             | 55.35           | 1.07                | 54.28                          | 47.05                | 47.97           | 3.10                | 44.87                          | 82.66                      |
| Afghanistan    | AFG  | 2013 | EMR        | LIC             | 56.26           | 0.83                | 55.43                          | 48.65                | 47.98           | 3.10                | 44.87                          | 80.95                      |
| Afghanistan    | AFG  | 2014 | EMR        | LIC             | 56.14           | 0.74                | 55.40                          | 48.64                | 47.48           | 3.07                | 44.41                          | 80.16                      |
| Afghanistan    | AFG  | 2015 | EMR        | LIC             | 61.17           | 0.57                | 60.60                          | 56.95                | 50.30           | 3.25                | 47.05                          | 77.65                      |
| Afghanistan    | AFG  | 2016 | EMR        | LIC             | 70.21           | 0.69                | 69.52                          | 71.31                | 58.04           | 3.75                | 54.29                          | 78.09                      |
| Afghanistan    | AFG  | 2017 | EMR        | LIC             | 76.65           | 1.27                | 75.38                          | 80.94                | 65.82           | 4.25                | 61.57                          | 81.68                      |
| Afghanistan    | AFG  | 2018 | EMR        | LIC             | 77.86           | 1.40                | 76.47                          | 82.92                | 67.19           | 4.34                | 62.85                          | 82.19                      |
| Afghanistan    | AFG  | 2019 | EMR        | LIC             | 82.17           | 1.23                | 80.94                          | 91.02                | 70.16           | 4.53                | 65.62                          | 81.08                      |
| Angola         | AGO  | 2010 | AFR        | LMIC            | 55.89           | 0.60                | 55.29                          | 64.02                | 46.59           | 3.01                | 43.58                          | 78.83                      |
| Angola         | AGO  | 2011 | AFR        | LMIC            | 56.38           | 0.49                | 55.89                          | 65.92                | 45.73           | 2.96                | 42.77                          | 76.53                      |
| Angola         | AGO  | 2012 | AFR        | LMIC            | 59.98           | 0.55                | 59.43                          | 71.78                | 49.16           | 3.18                | 45.98                          | 77.37                      |
| Angola         | AGO  | 2013 | AFR        | LMIC            | 67.25           | 0.82                | 66.43                          | 83.98                | 56.56           | 3.66                | 52.91                          | 79.64                      |
| Angola         | AGO  | 2014 | AFR        | LMIC            | 59.36           | 0.53                | 58.82                          | 71.77                | 47.62           | 3.08                | 44.54                          | 75.72                      |
| Angola         | AGO  | 2015 | AFR        | LMIC            | 65.06           | 0.82                | 64.24                          | 79.85                | 54.85           | 3.55                | 51.31                          | 79.87                      |
| Angola         | AGO  | 2016 | AFR        | LMIC            | 62.51           | 0.58                | 61.93                          | 77.78                | 49.96           | 3.23                | 46.73                          | 75.46                      |
| Angola         | AGO  | 2017 | AFR        | LMIC            | 55.24           | 0.49                | 54.75                          | 65.90                | 42.83           | 2.77                | 40.07                          | 73.18                      |
| Angola         | AGO  | 2018 | AFR        | LMIC            | 66.18           | 0.65                | 65.54                          | 86.03                | 51.73           | 3.34                | 48.39                          | 73.83                      |
| Angola         | AGO  | 2019 | AFR        | LMIC            | 74.12           | 0.99                | 73.13                          | 96.78                | 62.74           | 4.06                | 58.68                          | 80.25                      |
| Argentina      | ARG  | 2010 | AMR        | UMIC            | 86.36           | 0.28                | 86.07                          | 99.09                | 59.89           | 3.87                | 56.02                          | 65.09                      |
| Argentina      | ARG  | 2011 | AMR        | UMIC            | 85.23           | 0.32                | 84.91                          | 99.07                | 59.06           | 3.82                | 55.25                          | 65.06                      |
| Argentina      | ARG  | 2012 | AMR        | UMIC            | 84.82           | 0.34                | 84.49                          | 99.07                | 58.79           | 3.80                | 54.99                          | 65.09                      |
| Argentina      | ARG  | 2013 | AMR        | UMIC            | 88.16           | 0.26                | 87.90                          | 99.12                | 61.46           | 3.97                | 57.49                          | 65.40                      |
| Argentina      | ARG  | 2014 | AMR        | UMIC            | 82.10           | 0.54                | 81.56                          | 99.05                | 57.17           | 3.70                | 53.48                          | 65.57                      |
| Argentina      | ARG  | 2015 | AMR        | UMIC            | 79.82           | 1.08                | 78.73                          | 99.06                | 56.05           | 3.62                | 52.43                          | 66.59                      |
| Argentina      | ARG  | 2016 | AMR        | UMIC            | 83.90           | 0.39                | 83.51                          | 99.04                | 58.20           | 3.76                | 54.44                          | 65.18                      |
| Argentina      | ARG  | 2017 | AMR        | UMIC            | 82.25           | 0.52                | 81.72                          | 99.06                | 57.25           | 3.70                | 53.55                          | 65.53                      |
| Argentina      | ARG  | 2018 | AMR        | UMIC            | 88.72           | 0.26                | 88.45                          | 99.13                | 62.02           | 4.01                | 58.01                          | 65.59                      |
| Argentina      | ARG  | 2019 | AMR        | UMIC            | 90.51           | 0.30                | 90.21                          | 99.14                | 64.20           | 4.15                | 60.05                          | 66.57                      |
| Armenia        | ARM  | 2010 | EUR        | UMIC            | 74.95           | 0.58                | 74.37                          | 98.75                | 52.29           | 3.38                | 48.91                          | 65.77                      |
| Armenia        | ARM  | 2011 | EUR        | UMIC            | 73.33           | 1.02                | 72.31                          | 98.74                | 51.51           | 3.33                | 48.18                          | 66.63                      |
| Armenia        | ARM  | 2012 | EUR        | UMIC            | 74.71           | 0.63                | 74.08                          | 98.75                | 52.17           | 3.37                | 48.79                          | 65.87                      |
| Armenia        | ARM  | 2013 | EUR        | UMIC            | 73.61           | 0.92                | 72.69                          | 98.74                | 51.64           | 3.34                | 48.30                          | 66.45                      |
| Armenia        | ARM  | 2014 | EUR        | UMIC            | 72.73           | 0.52                | 72.21                          | 98.69                | 49.17           | 3.18                | 45.99                          | 63.69                      |
| Armenia        | ARM  | 2015 | EUR        | UMIC            | 72.73           | 0.53                | 72.20                          | 98.70                | 49.26           | 3.18                | 46.08                          | 63.82                      |
| Armenia        | ARM  | 2016 | EUR        | UMIC            | 72.73           | 0.66                | 72.06                          | 98.71                | 49.99           | 3.23                | 46.76                          | 64.88                      |
| Armenia        | ARM  | 2017 | EUR        | UMIC            | 72.73           | 0.81                | 71.92                          | 98.72                | 50.49           | 3.26                | 47.22                          | 65.66                      |
| Armenia        | ARM  | 2018 | EUR        | UMIC            | 72.73           | 0.97                | 71.76                          | 98.73                | 50.91           | 3.29                | 47.62                          | 66.36                      |
| Armenia        | ARM  | 2019 | EUR        | UMIC            | 83.38           | 0.29                | 83.10                          | 98.87                | 59.26           | 3.83                | 55.43                          | 66.71                      |
| American Samoa | ASM  | 2010 | WPR        | UMIC            | 79.09           | 0.39                | 78.70                          | 99.81                | 50.61           | 3.27                | 47.34                          | 60.15                      |
| American Samoa | ASM  | 2011 | WPR        | UMIC            | 79.09           | 0.33                | 78.77                          | 99.75                | 47.46           | 3.07                | 44.39                          | 56.36                      |

|                |     |      |     |      |       |      |       |       |       |      |       |       |
|----------------|-----|------|-----|------|-------|------|-------|-------|-------|------|-------|-------|
| American Samoa | ASM | 2012 | WPR | UMIC | 79.09 | 0.33 | 78.77 | 99.75 | 47.50 | 3.07 | 44.43 | 56.41 |
| American Samoa | ASM | 2013 | WPR | UMIC | 79.09 | 0.33 | 78.76 | 99.76 | 47.57 | 3.07 | 44.49 | 56.49 |
| American Samoa | ASM | 2014 | WPR | UMIC | 79.09 | 0.33 | 78.76 | 99.76 | 47.67 | 3.08 | 44.59 | 56.62 |
| American Samoa | ASM | 2015 | WPR | UMIC | 79.09 | 0.40 | 78.69 | 99.82 | 51.24 | 3.31 | 47.93 | 60.91 |
| American Samoa | ASM | 2016 | WPR | UMIC | 79.09 | 0.40 | 78.69 | 99.82 | 51.24 | 3.31 | 47.93 | 60.91 |
| American Samoa | ASM | 2017 | WPR | UMIC | 79.28 | 1.30 | 77.98 | 99.87 | 55.81 | 3.61 | 52.20 | 66.94 |
| American Samoa | ASM | 2018 | WPR | UMIC | 79.09 | 0.31 | 78.78 | 99.58 | 41.18 | 2.66 | 38.52 | 48.90 |
| American Samoa | ASM | 2019 | WPR | UMIC | 79.09 | 0.31 | 78.78 | 99.68 | 44.55 | 2.88 | 41.67 | 52.89 |
| Azerbaijan     | AZE | 2010 | EUR | UMIC | 81.78 | 0.24 | 81.54 | 97.94 | 57.25 | 3.70 | 53.55 | 65.67 |
| Azerbaijan     | AZE | 2011 | EUR | UMIC | 82.42 | 0.25 | 82.17 | 97.95 | 57.98 | 3.75 | 54.24 | 66.00 |
| Azerbaijan     | AZE | 2012 | EUR | UMIC | 80.88 | 0.24 | 80.64 | 97.93 | 56.34 | 3.64 | 52.70 | 65.35 |
| Azerbaijan     | AZE | 2013 | EUR | UMIC | 81.79 | 0.24 | 81.55 | 97.94 | 57.26 | 3.70 | 53.56 | 65.68 |
| Azerbaijan     | AZE | 2014 | EUR | UMIC | 74.30 | 0.72 | 73.58 | 97.86 | 51.97 | 3.36 | 48.61 | 66.06 |
| Azerbaijan     | AZE | 2015 | EUR | UMIC | 80.01 | 0.25 | 79.76 | 97.91 | 55.56 | 3.59 | 51.97 | 65.16 |
| Azerbaijan     | AZE | 2016 | EUR | UMIC | 82.27 | 0.25 | 82.02 | 97.95 | 57.80 | 3.74 | 54.06 | 65.92 |
| Azerbaijan     | AZE | 2017 | EUR | UMIC | 81.84 | 0.24 | 81.59 | 97.94 | 57.31 | 3.70 | 53.60 | 65.70 |
| Azerbaijan     | AZE | 2018 | EUR | UMIC | 77.19 | 0.35 | 76.83 | 97.88 | 53.54 | 3.46 | 50.08 | 65.18 |
| Azerbaijan     | AZE | 2019 | EUR | UMIC | 80.84 | 0.24 | 80.60 | 97.93 | 56.30 | 3.64 | 52.66 | 65.34 |
| Burundi        | BDI | 2010 | AFR | LIC  | 69.80 | 1.99 | 67.81 | 94.50 | 62.90 | 4.07 | 58.84 | 86.77 |
| Burundi        | BDI | 2011 | AFR | LIC  | 63.31 | 2.07 | 61.24 | 79.26 | 59.22 | 3.83 | 55.39 | 90.46 |
| Burundi        | BDI | 2012 | AFR | LIC  | 62.23 | 0.57 | 61.66 | 83.47 | 51.07 | 3.30 | 47.76 | 77.47 |
| Burundi        | BDI | 2013 | AFR | LIC  | 68.05 | 0.68 | 67.36 | 94.46 | 56.40 | 3.65 | 52.75 | 78.31 |
| Burundi        | BDI | 2014 | AFR | LIC  | 65.15 | 0.88 | 64.27 | 87.83 | 55.20 | 3.57 | 51.63 | 80.33 |
| Burundi        | BDI | 2015 | AFR | LIC  | 62.43 | 0.62 | 61.81 | 83.48 | 51.65 | 3.34 | 48.32 | 78.16 |
| Burundi        | BDI | 2016 | AFR | LIC  | 68.63 | 1.00 | 67.62 | 94.47 | 58.48 | 3.78 | 54.70 | 80.89 |
| Burundi        | BDI | 2017 | AFR | LIC  | 70.79 | 0.97 | 69.82 | 98.97 | 60.05 | 3.88 | 56.17 | 80.45 |
| Burundi        | BDI | 2018 | AFR | LIC  | 65.74 | 1.62 | 64.13 | 87.85 | 57.98 | 3.75 | 54.23 | 84.57 |
| Burundi        | BDI | 2019 | AFR | LIC  | 61.54 | 0.69 | 60.85 | 81.34 | 51.46 | 3.33 | 48.14 | 79.11 |
| Benin          | BEN | 2010 | AFR | LMIC | 66.42 | 0.58 | 65.83 | 83.87 | 54.02 | 3.49 | 50.53 | 76.75 |
| Benin          | BEN | 2011 | AFR | LMIC | 70.87 | 0.46 | 70.41 | 97.02 | 53.21 | 3.44 | 49.77 | 70.69 |
| Benin          | BEN | 2012 | AFR | LMIC | 66.75 | 0.47 | 66.28 | 88.15 | 50.55 | 3.27 | 47.29 | 71.34 |
| Benin          | BEN | 2013 | AFR | LMIC | 64.52 | 0.44 | 64.08 | 83.83 | 48.66 | 3.15 | 45.51 | 71.02 |
| Benin          | BEN | 2014 | AFR | LMIC | 65.18 | 0.37 | 64.81 | 85.97 | 48.29 | 3.12 | 45.17 | 69.69 |
| Benin          | BEN | 2015 | AFR | LMIC | 68.03 | 0.53 | 67.50 | 90.35 | 52.06 | 3.36 | 48.69 | 72.14 |
| Benin          | BEN | 2016 | AFR | LMIC | 64.50 | 0.29 | 64.21 | 85.95 | 46.74 | 3.02 | 43.72 | 68.09 |
| Benin          | BEN | 2017 | AFR | LMIC | 58.21 | 0.26 | 57.95 | 73.33 | 42.25 | 2.73 | 39.52 | 68.20 |
| Benin          | BEN | 2018 | AFR | LMIC | 66.86 | 0.50 | 66.37 | 88.16 | 50.93 | 3.29 | 47.64 | 71.78 |
| Benin          | BEN | 2019 | AFR | LMIC | 70.59 | 0.74 | 69.85 | 94.80 | 55.46 | 3.58 | 51.88 | 74.26 |
| Burkina Faso   | BFA | 2010 | AFR | LIC  | 55.80 | 0.23 | 55.57 | 73.25 | 40.17 | 2.60 | 37.57 | 67.61 |
| Burkina Faso   | BFA | 2011 | AFR | LIC  | 62.61 | 0.48 | 62.13 | 83.41 | 47.86 | 3.09 | 44.76 | 72.05 |
| Burkina Faso   | BFA | 2012 | AFR | LIC  | 63.54 | 0.63 | 62.91 | 81.40 | 52.55 | 3.40 | 49.15 | 78.13 |
| Burkina Faso   | BFA | 2013 | AFR | LIC  | 64.13 | 0.56 | 63.57 | 83.45 | 52.02 | 3.36 | 48.66 | 76.55 |
| Burkina Faso   | BFA | 2014 | AFR | LIC  | 65.47 | 0.59 | 64.89 | 85.53 | 53.55 | 3.46 | 50.09 | 77.19 |
| Burkina Faso   | BFA | 2015 | AFR | LIC  | 71.26 | 2.71 | 68.55 | 87.71 | 68.82 | 4.45 | 64.37 | 93.90 |
| Burkina Faso   | BFA | 2016 | AFR | LIC  | 67.37 | 0.89 | 66.48 | 87.64 | 56.99 | 3.68 | 53.30 | 80.18 |
| Burkina Faso   | BFA | 2017 | AFR | LIC  | 66.97 | 1.81 | 65.16 | 85.57 | 59.54 | 3.85 | 55.69 | 85.46 |
| Burkina Faso   | BFA | 2018 | AFR | LIC  | 70.90 | 1.05 | 69.85 | 94.00 | 60.50 | 3.91 | 56.59 | 81.02 |
| Burkina Faso   | BFA | 2019 | AFR | LIC  | 56.09 | 0.50 | 55.59 | 69.36 | 45.05 | 2.91 | 42.14 | 75.80 |

|                        |     |      |     |      |       |      |       |       |       |      |       |        |
|------------------------|-----|------|-----|------|-------|------|-------|-------|-------|------|-------|--------|
| Bangladesh             | BGD | 2010 | SEA | LMIC | 55.78 | 2.10 | 53.68 | 33.08 | 53.76 | 3.47 | 50.28 | 93.68  |
| Bangladesh             | BGD | 2011 | SEA | LMIC | 56.43 | 2.51 | 53.92 | 33.08 | 56.62 | 3.66 | 52.96 | 98.21  |
| Bangladesh             | BGD | 2012 | SEA | LMIC | 60.91 | 2.48 | 58.43 | 38.75 | 59.91 | 3.87 | 56.03 | 95.90  |
| Bangladesh             | BGD | 2013 | SEA | LMIC | 66.37 | 3.25 | 63.12 | 44.87 | 68.14 | 4.40 | 63.74 | 100.97 |
| Bangladesh             | BGD | 2014 | SEA | LMIC | 67.13 | 2.89 | 64.23 | 46.46 | 66.90 | 4.32 | 62.58 | 97.42  |
| Bangladesh             | BGD | 2015 | SEA | LMIC | 68.13 | 1.89 | 66.24 | 53.06 | 60.71 | 3.92 | 56.78 | 85.72  |
| Bangladesh             | BGD | 2016 | SEA | LMIC | 72.66 | 1.98 | 70.68 | 60.13 | 64.64 | 4.18 | 60.46 | 85.55  |
| Bangladesh             | BGD | 2017 | SEA | LMIC | 79.69 | 2.31 | 77.38 | 69.58 | 72.67 | 4.70 | 67.97 | 87.84  |
| Bangladesh             | BGD | 2018 | SEA | LMIC | 86.19 | 2.46 | 83.73 | 81.78 | 78.08 | 5.05 | 73.03 | 87.22  |
| Bangladesh             | BGD | 2019 | SEA | LMIC | 92.16 | 2.67 | 89.49 | 94.91 | 82.57 | 5.34 | 77.23 | 86.30  |
| Bulgaria               | BGR | 2010 | EUR | UMIC | 72.73 | 0.64 | 72.09 | 99.88 | 49.87 | 3.22 | 46.64 | 64.70  |
| Bulgaria               | BGR | 2011 | EUR | UMIC | 72.73 | 0.62 | 72.11 | 99.88 | 49.77 | 3.22 | 46.55 | 64.56  |
| Bulgaria               | BGR | 2012 | EUR | UMIC | 72.73 | 0.52 | 72.21 | 99.87 | 49.16 | 3.18 | 45.99 | 63.69  |
| Bulgaria               | BGR | 2013 | EUR | UMIC | 72.73 | 0.61 | 72.12 | 99.88 | 49.72 | 3.21 | 46.50 | 64.48  |
| Bulgaria               | BGR | 2014 | EUR | UMIC | 72.73 | 0.42 | 72.31 | 99.86 | 48.08 | 3.11 | 44.97 | 62.19  |
| Bulgaria               | BGR | 2015 | EUR | UMIC | 72.73 | 0.47 | 72.26 | 99.87 | 48.71 | 3.15 | 45.56 | 63.06  |
| Bulgaria               | BGR | 2016 | EUR | UMIC | 72.73 | 0.45 | 72.28 | 99.86 | 48.51 | 3.14 | 45.38 | 62.78  |
| Bulgaria               | BGR | 2017 | EUR | UMIC | 72.73 | 0.40 | 72.33 | 99.86 | 47.85 | 3.09 | 44.76 | 61.89  |
| Bulgaria               | BGR | 2018 | EUR | UMIC | 72.73 | 0.38 | 72.35 | 99.85 | 47.36 | 3.06 | 44.30 | 61.23  |
| Bulgaria               | BGR | 2019 | EUR | UMIC | 72.73 | 0.39 | 72.34 | 99.85 | 47.64 | 3.08 | 44.56 | 61.60  |
| Bosnia and Herzegovina | BIH | 2010 | EUR | UMIC | 80.17 | 0.25 | 79.93 | 98.60 | 55.70 | 3.60 | 52.10 | 65.18  |
| Bosnia and Herzegovina | BIH | 2011 | EUR | UMIC | 72.73 | 0.70 | 72.03 | 98.51 | 50.13 | 3.24 | 46.89 | 65.10  |
| Bosnia and Herzegovina | BIH | 2012 | EUR | UMIC | 72.73 | 0.43 | 72.30 | 98.47 | 48.23 | 3.12 | 45.11 | 62.40  |
| Bosnia and Herzegovina | BIH | 2013 | EUR | UMIC | 72.73 | 0.41 | 72.32 | 98.47 | 47.93 | 3.10 | 44.83 | 61.99  |
| Bosnia and Herzegovina | BIH | 2014 | EUR | UMIC | 72.73 | 0.37 | 72.36 | 98.46 | 47.12 | 3.05 | 44.07 | 60.91  |
| Bosnia and Herzegovina | BIH | 2015 | EUR | UMIC | 72.73 | 0.38 | 72.35 | 98.46 | 47.28 | 3.06 | 44.23 | 61.13  |
| Bosnia and Herzegovina | BIH | 2016 | EUR | UMIC | 72.73 | 0.36 | 72.37 | 98.44 | 46.52 | 3.01 | 43.51 | 60.12  |
| Bosnia and Herzegovina | BIH | 2017 | EUR | UMIC | 72.73 | 0.38 | 72.34 | 98.46 | 47.50 | 3.07 | 44.43 | 61.41  |
| Bosnia and Herzegovina | BIH | 2018 | EUR | UMIC | 74.07 | 0.78 | 73.29 | 98.55 | 51.85 | 3.35 | 48.50 | 66.18  |
| Bosnia and Herzegovina | BIH | 2019 | EUR | UMIC | 73.52 | 0.95 | 72.57 | 98.55 | 51.60 | 3.34 | 48.26 | 66.51  |
| Belarus                | BLR | 2010 | EUR | UMIC | 72.73 | 0.35 | 72.38 | 97.33 | 46.35 | 3.00 | 43.35 | 59.90  |
| Belarus                | BLR | 2011 | EUR | UMIC | 72.73 | 0.36 | 72.36 | 97.34 | 46.89 | 3.03 | 43.86 | 60.61  |
| Belarus                | BLR | 2012 | EUR | UMIC | 72.73 | 0.36 | 72.36 | 97.34 | 46.90 | 3.03 | 43.87 | 60.62  |
| Belarus                | BLR | 2013 | EUR | UMIC | 72.73 | 0.36 | 72.37 | 97.34 | 46.60 | 3.01 | 43.59 | 60.23  |
| Belarus                | BLR | 2014 | EUR | UMIC | 72.73 | 0.34 | 72.38 | 97.33 | 45.96 | 2.97 | 42.99 | 59.39  |
| Belarus                | BLR | 2015 | EUR | UMIC | 72.73 | 0.37 | 72.36 | 97.35 | 47.02 | 3.04 | 43.98 | 60.78  |
| Belarus                | BLR | 2016 | EUR | UMIC | 78.31 | 0.29 | 78.02 | 97.47 | 54.27 | 3.51 | 50.76 | 65.07  |
| Belarus                | BLR | 2017 | EUR | UMIC | 80.44 | 0.24 | 80.20 | 97.50 | 55.93 | 3.62 | 52.32 | 65.24  |
| Belarus                | BLR | 2018 | EUR | UMIC | 80.97 | 0.24 | 80.73 | 97.50 | 56.42 | 3.65 | 52.78 | 65.37  |
| Belarus                | BLR | 2019 | EUR | UMIC | 72.73 | 0.31 | 72.41 | 97.29 | 44.45 | 2.87 | 41.58 | 57.42  |
| Belize                 | BLZ | 2010 | AMR | UMIC | 90.53 | 0.30 | 90.22 | 98.58 | 64.23 | 4.15 | 60.08 | 66.59  |
| Belize                 | BLZ | 2011 | AMR | UMIC | 93.88 | 0.71 | 93.17 | 98.68 | 71.67 | 4.63 | 67.04 | 71.95  |
| Belize                 | BLZ | 2012 | AMR | UMIC | 87.33 | 0.27 | 87.06 | 98.52 | 60.69 | 3.92 | 56.77 | 65.21  |
| Belize                 | BLZ | 2013 | AMR | UMIC | 90.61 | 0.31 | 90.30 | 98.58 | 64.35 | 4.16 | 60.19 | 66.65  |
| Belize                 | BLZ | 2014 | AMR | UMIC | 90.95 | 0.33 | 90.63 | 98.59 | 64.86 | 4.19 | 60.67 | 66.95  |
| Belize                 | BLZ | 2015 | AMR | UMIC | 90.44 | 0.30 | 90.14 | 98.58 | 64.11 | 4.14 | 59.96 | 66.52  |
| Belize                 | BLZ | 2016 | AMR | UMIC | 79.09 | 0.86 | 78.24 | 98.45 | 54.85 | 3.55 | 51.30 | 65.58  |
| Belize                 | BLZ | 2017 | AMR | UMIC | 81.00 | 0.74 | 80.26 | 98.46 | 56.61 | 3.66 | 52.95 | 65.98  |

|                                  |     |      |     |      |       |      |       |       |       |      |       |       |
|----------------------------------|-----|------|-----|------|-------|------|-------|-------|-------|------|-------|-------|
| Belize                           | BLZ | 2018 | AMR | UMIC | 83.85 | 0.39 | 83.46 | 98.49 | 58.17 | 3.76 | 54.41 | 65.19 |
| Belize                           | BLZ | 2019 | AMR | UMIC | 82.06 | 0.55 | 81.51 | 98.48 | 57.15 | 3.69 | 53.46 | 65.58 |
| Bolivia (Plurinational State of) | BOL | 2010 | AMR | LMIC | 68.11 | 0.62 | 67.49 | 93.08 | 54.58 | 3.53 | 51.05 | 75.64 |
| Bolivia (Plurinational State of) | BOL | 2011 | AMR | LMIC | 68.98 | 0.50 | 68.47 | 97.44 | 52.42 | 3.39 | 49.03 | 71.61 |
| Bolivia (Plurinational State of) | BOL | 2012 | AMR | LMIC | 68.00 | 0.52 | 67.48 | 95.23 | 51.95 | 3.36 | 48.59 | 72.01 |
| Bolivia (Plurinational State of) | BOL | 2013 | AMR | LMIC | 69.39 | 0.65 | 68.74 | 97.45 | 54.06 | 3.49 | 50.56 | 73.56 |
| Bolivia (Plurinational State of) | BOL | 2014 | AMR | LMIC | 67.87 | 0.49 | 67.38 | 95.23 | 51.49 | 3.33 | 48.17 | 71.49 |
| Bolivia (Plurinational State of) | BOL | 2015 | AMR | LMIC | 65.72 | 0.47 | 65.25 | 90.87 | 49.89 | 3.22 | 46.66 | 71.52 |
| Bolivia (Plurinational State of) | BOL | 2016 | AMR | LMIC | 65.84 | 0.50 | 65.33 | 90.87 | 50.30 | 3.25 | 47.05 | 72.01 |
| Bolivia (Plurinational State of) | BOL | 2017 | AMR | LMIC | 65.38 | 0.41 | 64.98 | 90.86 | 48.83 | 3.16 | 45.68 | 70.30 |
| Bolivia (Plurinational State of) | BOL | 2018 | AMR | LMIC | 65.26 | 0.27 | 64.99 | 93.00 | 46.96 | 3.04 | 43.92 | 67.58 |
| Bolivia (Plurinational State of) | BOL | 2019 | AMR | LMIC | 64.04 | 0.25 | 63.79 | 90.83 | 45.90 | 2.97 | 42.94 | 67.31 |
| Brazil                           | BRA | 2010 | AMR | UMIC | 93.15 | 0.56 | 92.59 | 98.31 | 69.37 | 4.48 | 64.89 | 70.08 |
| Brazil                           | BRA | 2011 | AMR | UMIC | 92.15 | 0.42 | 91.72 | 98.27 | 66.98 | 4.33 | 62.65 | 68.30 |
| Brazil                           | BRA | 2012 | AMR | UMIC | 92.89 | 0.52 | 92.37 | 98.30 | 68.68 | 4.44 | 64.24 | 69.54 |
| Brazil                           | BRA | 2013 | AMR | UMIC | 92.67 | 0.49 | 92.19 | 98.29 | 68.14 | 4.40 | 63.73 | 69.14 |
| Brazil                           | BRA | 2014 | AMR | UMIC | 92.68 | 0.49 | 92.19 | 98.29 | 68.16 | 4.41 | 63.75 | 69.15 |
| Brazil                           | BRA | 2015 | AMR | UMIC | 93.46 | 0.62 | 92.84 | 98.32 | 70.25 | 4.54 | 65.71 | 70.78 |
| Brazil                           | BRA | 2016 | AMR | UMIC | 93.94 | 0.73 | 93.21 | 98.35 | 71.88 | 4.65 | 67.23 | 72.13 |
| Brazil                           | BRA | 2017 | AMR | UMIC | 94.08 | 0.77 | 93.31 | 98.36 | 72.43 | 4.68 | 67.74 | 72.61 |
| Brazil                           | BRA | 2018 | AMR | UMIC | 94.84 | 0.99 | 93.85 | 98.40 | 75.13 | 4.86 | 70.27 | 74.88 |
| Brazil                           | BRA | 2019 | AMR | UMIC | 95.28 | 0.90 | 94.38 | 98.41 | 75.97 | 4.91 | 71.06 | 75.30 |
| Bhutan                           | BTN | 2010 | SEA | LMIC | 82.92 | 0.27 | 82.65 | 94.97 | 58.61 | 3.79 | 54.82 | 66.33 |
| Bhutan                           | BTN | 2011 | SEA | LMIC | 80.87 | 0.24 | 80.63 | 94.93 | 56.33 | 3.64 | 52.69 | 65.34 |
| Bhutan                           | BTN | 2012 | SEA | LMIC | 84.83 | 0.40 | 84.43 | 95.01 | 61.79 | 3.99 | 57.80 | 68.45 |
| Bhutan                           | BTN | 2013 | SEA | LMIC | 84.66 | 0.38 | 84.27 | 95.00 | 61.44 | 3.97 | 57.46 | 68.19 |
| Bhutan                           | BTN | 2014 | SEA | LMIC | 82.93 | 0.27 | 82.67 | 94.97 | 58.63 | 3.79 | 54.84 | 66.34 |
| Bhutan                           | BTN | 2015 | SEA | LMIC | 83.14 | 0.28 | 82.86 | 94.97 | 58.91 | 3.81 | 55.11 | 66.50 |
| Bhutan                           | BTN | 2016 | SEA | LMIC | 80.32 | 0.24 | 80.07 | 94.93 | 55.83 | 3.61 | 52.22 | 65.21 |
| Bhutan                           | BTN | 2017 | SEA | LMIC | 82.70 | 0.26 | 82.44 | 94.96 | 58.33 | 3.77 | 54.56 | 66.18 |
| Bhutan                           | BTN | 2018 | SEA | LMIC | 83.25 | 0.28 | 82.97 | 94.97 | 59.08 | 3.82 | 55.26 | 66.60 |
| Bhutan                           | BTN | 2019 | SEA | LMIC | 83.73 | 0.31 | 83.42 | 94.98 | 59.79 | 3.86 | 55.93 | 67.04 |
| Botswana                         | BWA | 2010 | AFR | UMIC | 66.56 | 0.25 | 66.30 | 72.83 | 46.12 | 2.98 | 43.14 | 65.07 |
| Botswana                         | BWA | 2011 | AFR | UMIC | 69.01 | 0.20 | 68.80 | 72.85 | 48.14 | 3.11 | 45.02 | 65.44 |
| Botswana                         | BWA | 2012 | AFR | UMIC | 74.89 | 0.23 | 74.66 | 87.45 | 51.99 | 3.36 | 48.63 | 65.14 |
| Botswana                         | BWA | 2013 | AFR | UMIC | 80.99 | 0.24 | 80.75 | 98.65 | 56.44 | 3.65 | 52.79 | 65.38 |
| Botswana                         | BWA | 2014 | AFR | UMIC | 73.37 | 0.28 | 73.09 | 87.44 | 50.85 | 3.29 | 47.56 | 65.07 |
| Botswana                         | BWA | 2015 | AFR | UMIC | 62.95 | 0.34 | 62.61 | 68.87 | 43.74 | 2.83 | 40.91 | 65.35 |
| Botswana                         | BWA | 2016 | AFR | UMIC | 78.53 | 0.23 | 78.30 | 91.87 | 54.91 | 3.55 | 51.36 | 65.59 |
| Botswana                         | BWA | 2017 | AFR | UMIC | 79.71 | 0.25 | 79.46 | 98.63 | 55.31 | 3.58 | 51.74 | 65.12 |
| Botswana                         | BWA | 2018 | AFR | UMIC | 78.83 | 0.31 | 78.52 | 87.51 | 56.61 | 3.66 | 52.95 | 67.44 |
| Botswana                         | BWA | 2019 | AFR | UMIC | 52.22 | 0.18 | 52.04 | 45.75 | 36.19 | 2.34 | 33.85 | 65.06 |
| Central African Republic         | CAF | 2010 | AFR | LIC  | 33.44 | 1.36 | 32.08 | 52.35 | 32.89 | 2.13 | 30.77 | 95.90 |
| Central African Republic         | CAF | 2011 | AFR | LIC  | 27.62 | 0.79 | 26.83 | 43.95 | 25.07 | 1.62 | 23.45 | 87.39 |
| Central African Republic         | CAF | 2012 | AFR | LIC  | 37.49 | 0.33 | 37.16 | 65.14 | 30.25 | 1.96 | 28.29 | 76.14 |
| Central African Republic         | CAF | 2013 | AFR | LIC  | 40.55 | 0.64 | 39.91 | 69.52 | 34.73 | 2.24 | 32.49 | 81.39 |
| Central African Republic         | CAF | 2014 | AFR | LIC  | 47.44 | 0.92 | 46.53 | 82.76 | 41.13 | 2.66 | 38.47 | 82.69 |

|                                           |     |      |     |      |        |      |       |       |       |      |       |       |
|-------------------------------------------|-----|------|-----|------|--------|------|-------|-------|-------|------|-------|-------|
| Central African Republic                  | CAF | 2015 | AFR | LIC  | 51.10  | 1.96 | 49.14 | 85.04 | 49.43 | 3.20 | 46.24 | 94.08 |
| Central African Republic                  | CAF | 2016 | AFR | LIC  | 48.93  | 1.51 | 47.42 | 82.79 | 45.24 | 2.92 | 42.31 | 89.22 |
| Central African Republic                  | CAF | 2017 | AFR | LIC  | 45.01  | 1.30 | 43.71 | 76.13 | 41.01 | 2.65 | 38.36 | 87.75 |
| Central African Republic                  | CAF | 2018 | AFR | LIC  | 48.74  | 1.20 | 47.54 | 85.00 | 42.99 | 2.78 | 40.21 | 84.58 |
| Central African Republic                  | CAF | 2019 | AFR | LIC  | 54.16  | 1.55 | 52.61 | 94.01 | 49.24 | 3.18 | 46.06 | 87.54 |
| China                                     | CHN | 2010 | WPR | UMIC | 100.00 | 2.91 | 97.09 | 81.21 | 89.48 | 5.78 | 83.70 | 86.21 |
| China                                     | CHN | 2011 | WPR | UMIC | 99.11  | 1.54 | 97.57 | 81.17 | 84.81 | 5.48 | 79.33 | 81.31 |
| China                                     | CHN | 2012 | WPR | UMIC | 99.07  | 1.50 | 97.57 | 81.17 | 84.67 | 5.47 | 79.20 | 81.17 |
| China                                     | CHN | 2013 | WPR | UMIC | 98.02  | 0.95 | 97.08 | 81.14 | 80.92 | 5.23 | 75.69 | 77.97 |
| China                                     | CHN | 2014 | WPR | UMIC | 98.19  | 0.99 | 97.20 | 81.14 | 81.43 | 5.26 | 76.17 | 78.37 |
| China                                     | CHN | 2015 | WPR | UMIC | 98.42  | 1.08 | 97.34 | 81.15 | 82.21 | 5.31 | 76.89 | 78.99 |
| China                                     | CHN | 2016 | WPR | UMIC | 96.60  | 0.87 | 95.72 | 78.57 | 79.10 | 5.11 | 73.99 | 77.29 |
| China                                     | CHN | 2017 | WPR | UMIC | 95.93  | 0.84 | 95.09 | 78.55 | 77.40 | 5.00 | 72.40 | 76.14 |
| China                                     | CHN | 2018 | WPR | UMIC | 100.00 | 1.12 | 98.88 | 91.87 | 78.91 | 5.10 | 73.81 | 74.65 |
| China                                     | CHN | 2019 | WPR | UMIC | 94.15  | 0.80 | 93.35 | 78.50 | 72.71 | 4.70 | 68.01 | 72.86 |
| Cote d'Ivoire                             | CIV | 2010 | AFR | LMIC | 63.27  | 1.24 | 62.03 | 74.16 | 54.90 | 3.55 | 51.35 | 82.79 |
| Cote d'Ivoire                             | CIV | 2011 | AFR | LMIC | 63.38  | 0.59 | 62.79 | 76.14 | 52.07 | 3.37 | 48.70 | 77.57 |
| Cote d'Ivoire                             | CIV | 2012 | AFR | LMIC | 73.14  | 2.57 | 70.57 | 86.50 | 69.35 | 4.48 | 64.87 | 91.93 |
| Cote d'Ivoire                             | CIV | 2013 | AFR | LMIC | 73.62  | 0.74 | 72.88 | 94.96 | 61.00 | 3.94 | 57.06 | 78.29 |
| Cote d'Ivoire                             | CIV | 2014 | AFR | LMIC | 69.51  | 0.86 | 68.65 | 86.43 | 58.50 | 3.78 | 54.72 | 79.70 |
| Cote d'Ivoire                             | CIV | 2015 | AFR | LMIC | 70.74  | 2.10 | 68.64 | 84.39 | 64.88 | 4.19 | 60.69 | 88.42 |
| Cote d'Ivoire                             | CIV | 2016 | AFR | LMIC | 64.38  | 0.66 | 63.73 | 80.18 | 51.07 | 3.30 | 47.77 | 74.96 |
| Cote d'Ivoire                             | CIV | 2017 | AFR | LMIC | 63.11  | 0.69 | 62.42 | 78.14 | 49.87 | 3.22 | 46.65 | 74.73 |
| Cote d'Ivoire                             | CIV | 2018 | AFR | LMIC | 65.62  | 0.61 | 65.00 | 80.20 | 53.95 | 3.49 | 50.46 | 77.63 |
| Cote d'Ivoire                             | CIV | 2019 | AFR | LMIC | 66.10  | 0.58 | 65.51 | 82.24 | 53.24 | 3.44 | 49.80 | 76.01 |
| Cameroon                                  | CMR | 2010 | AFR | LMIC | 53.59  | 2.10 | 51.48 | 79.29 | 52.17 | 3.37 | 48.79 | 94.78 |
| Cameroon                                  | CMR | 2011 | AFR | LMIC | 53.44  | 1.55 | 51.89 | 83.69 | 47.85 | 3.09 | 44.75 | 86.25 |
| Cameroon                                  | CMR | 2012 | AFR | LMIC | 54.54  | 1.57 | 52.97 | 85.92 | 48.75 | 3.15 | 45.60 | 86.10 |
| Cameroon                                  | CMR | 2013 | AFR | LMIC | 56.04  | 0.68 | 55.36 | 90.39 | 47.13 | 3.05 | 44.09 | 79.64 |
| Cameroon                                  | CMR | 2014 | AFR | LMIC | 60.97  | 2.00 | 58.97 | 94.98 | 57.03 | 3.69 | 53.34 | 90.46 |
| Cameroon                                  | CMR | 2015 | AFR | LMIC | 62.17  | 2.05 | 60.12 | 97.27 | 58.22 | 3.76 | 54.46 | 90.58 |
| Cameroon                                  | CMR | 2016 | AFR | LMIC | 59.79  | 1.05 | 58.74 | 97.23 | 51.54 | 3.33 | 48.21 | 82.07 |
| Cameroon                                  | CMR | 2017 | AFR | LMIC | 57.69  | 1.23 | 56.46 | 92.67 | 50.32 | 3.25 | 47.07 | 83.37 |
| Cameroon                                  | CMR | 2018 | AFR | LMIC | 57.87  | 1.70 | 56.17 | 90.43 | 52.92 | 3.42 | 49.50 | 88.13 |
| Cameroon                                  | CMR | 2019 | AFR | LMIC | 60.22  | 1.75 | 58.48 | 97.24 | 53.86 | 3.48 | 50.38 | 86.16 |
| Cameroon Democratic Republic of the Congo | COD | 2010 | AFR | LIC  | 61.27  | 1.61 | 59.66 | 69.32 | 54.32 | 3.51 | 50.81 | 85.17 |
| Democratic Republic of the Congo          | COD | 2011 | AFR | LIC  | 57.08  | 1.63 | 55.44 | 62.11 | 51.30 | 3.32 | 47.99 | 86.56 |
| Democratic Republic of the Congo          | COD | 2012 | AFR | LIC  | 55.06  | 1.57 | 53.49 | 58.59 | 49.76 | 3.22 | 46.55 | 87.02 |
| Democratic Republic of the Congo          | COD | 2013 | AFR | LIC  | 54.20  | 1.02 | 53.18 | 58.58 | 46.92 | 3.03 | 43.88 | 82.52 |
| Democratic Republic of the Congo          | COD | 2014 | AFR | LIC  | 54.24  | 1.08 | 53.16 | 58.58 | 47.10 | 3.04 | 44.06 | 82.87 |
| Democratic Republic of the Congo          | COD | 2015 | AFR | LIC  | 53.52  | 0.53 | 52.99 | 58.56 | 44.31 | 2.86 | 41.45 | 78.22 |
| Democratic Republic of the Congo          | COD | 2016 | AFR | LIC  | 57.53  | 1.00 | 56.53 | 63.87 | 49.56 | 3.20 | 46.36 | 82.02 |
| Democratic Republic of the Congo          | COD | 2017 | AFR | LIC  | 66.35  | 2.03 | 64.32 | 74.91 | 61.23 | 3.96 | 57.27 | 89.05 |
| Democratic Republic of the Congo          | COD | 2018 | AFR | LIC  | 73.92  | 2.44 | 71.48 | 86.43 | 69.26 | 4.48 | 64.79 | 90.64 |
| Democratic Republic of the Congo          | COD | 2019 | AFR | LIC  | 75.10  | 2.48 | 72.61 | 88.39 | 70.37 | 4.55 | 65.82 | 90.64 |
| Congo                                     | COG | 2010 | AFR | LMIC | 69.60  | 0.91 | 68.69 | 87.99 | 58.82 | 3.80 | 55.02 | 80.11 |
| Congo                                     | COG | 2011 | AFR | LMIC | 71.67  | 0.63 | 71.04 | 94.42 | 57.82 | 3.74 | 54.08 | 76.13 |



|            |     |      |     |      |       |      |       |       |       |      |       |        |
|------------|-----|------|-----|------|-------|------|-------|-------|-------|------|-------|--------|
| Congo      | COG | 2012 | AFR | LMIC | 68.12 | 0.21 | 67.90 | 96.49 | 47.98 | 3.10 | 44.88 | 66.09  |
| Congo      | COG | 2013 | AFR | LMIC | 63.59 | 0.22 | 63.37 | 85.76 | 45.20 | 2.92 | 42.28 | 66.72  |
| Congo      | COG | 2014 | AFR | LMIC | 63.34 | 1.35 | 61.99 | 75.57 | 55.27 | 3.57 | 51.70 | 83.39  |
| Congo      | COG | 2015 | AFR | LMIC | 66.20 | 4.58 | 61.62 | 71.67 | 76.46 | 4.94 | 71.51 | 116.05 |
| Congo      | COG | 2016 | AFR | LMIC | 65.10 | 2.38 | 62.72 | 73.60 | 62.26 | 4.02 | 58.24 | 92.85  |
| Congo      | COG | 2017 | AFR | LMIC | 61.29 | 2.14 | 59.16 | 67.67 | 58.02 | 3.75 | 54.27 | 91.73  |
| Congo      | COG | 2018 | AFR | LMIC | 63.48 | 2.14 | 61.34 | 71.60 | 59.72 | 3.86 | 55.86 | 91.07  |
| Congo      | COG | 2019 | AFR | LMIC | 64.09 | 0.68 | 63.41 | 81.66 | 50.40 | 3.26 | 47.14 | 74.35  |
| Colombia   | COL | 2010 | AMR | UMIC | 82.64 | 0.26 | 82.38 | 97.71 | 58.25 | 3.76 | 54.48 | 66.14  |
| Colombia   | COL | 2011 | AMR | UMIC | 81.90 | 0.24 | 81.66 | 97.70 | 57.38 | 3.71 | 53.67 | 65.73  |
| Colombia   | COL | 2012 | AMR | UMIC | 81.30 | 0.24 | 81.06 | 97.69 | 56.75 | 3.67 | 53.08 | 65.48  |
| Colombia   | COL | 2013 | AMR | UMIC | 81.39 | 0.24 | 81.15 | 97.70 | 56.84 | 3.67 | 53.16 | 65.51  |
| Colombia   | COL | 2014 | AMR | UMIC | 77.95 | 0.31 | 77.63 | 97.66 | 54.02 | 3.49 | 50.53 | 65.09  |
| Colombia   | COL | 2015 | AMR | UMIC | 81.02 | 0.24 | 80.78 | 97.69 | 56.47 | 3.65 | 52.82 | 65.39  |
| Colombia   | COL | 2016 | AMR | UMIC | 81.26 | 0.24 | 81.02 | 97.69 | 56.70 | 3.67 | 53.04 | 65.47  |
| Colombia   | COL | 2017 | AMR | UMIC | 80.87 | 0.24 | 80.63 | 97.68 | 56.33 | 3.64 | 52.69 | 65.34  |
| Colombia   | COL | 2018 | AMR | UMIC | 81.10 | 0.24 | 80.86 | 97.69 | 56.55 | 3.66 | 52.89 | 65.41  |
| Colombia   | COL | 2019 | AMR | UMIC | 77.78 | 0.32 | 77.46 | 97.64 | 53.92 | 3.48 | 50.43 | 65.10  |
| Comoros    | COM | 2010 | AFR | LMIC | 46.08 | 0.23 | 45.85 | 74.79 | 31.98 | 2.07 | 29.92 | 65.24  |
| Comoros    | COM | 2011 | AFR | LMIC | 44.97 | 0.35 | 44.62 | 74.78 | 31.37 | 2.03 | 29.35 | 65.77  |
| Comoros    | COM | 2012 | AFR | LMIC | 45.63 | 0.26 | 45.36 | 74.79 | 31.72 | 2.05 | 29.67 | 65.41  |
| Comoros    | COM | 2013 | AFR | LMIC | 45.17 | 0.32 | 44.86 | 74.78 | 31.48 | 2.03 | 29.44 | 65.64  |
| Comoros    | COM | 2014 | AFR | LMIC | 54.28 | 0.23 | 54.04 | 92.76 | 37.63 | 2.43 | 35.20 | 65.13  |
| Comoros    | COM | 2015 | AFR | LMIC | 56.85 | 0.18 | 56.67 | 95.10 | 39.45 | 2.55 | 36.90 | 65.12  |
| Comoros    | COM | 2016 | AFR | LMIC | 59.76 | 0.18 | 59.58 | 99.79 | 41.65 | 2.69 | 38.96 | 65.39  |
| Comoros    | COM | 2017 | AFR | LMIC | 43.84 | 0.18 | 43.67 | 68.35 | 30.39 | 1.96 | 28.42 | 65.09  |
| Comoros    | COM | 2018 | AFR | LMIC | 41.80 | 0.13 | 41.66 | 62.08 | 29.00 | 1.87 | 27.13 | 65.11  |
| Comoros    | COM | 2019 | AFR | LMIC | 41.88 | 0.13 | 41.75 | 62.08 | 29.07 | 1.88 | 27.19 | 65.12  |
| Cabo Verde | CPV | 2010 | AFR | LMIC | 90.09 | 1.39 | 88.70 | 98.68 | 77.06 | 4.98 | 72.08 | 81.26  |
| Cabo Verde | CPV | 2011 | AFR | LMIC | 90.04 | 1.34 | 88.69 | 98.67 | 76.84 | 4.97 | 71.88 | 81.04  |
| Cabo Verde | CPV | 2012 | AFR | LMIC | 90.46 | 1.88 | 88.58 | 98.69 | 78.79 | 5.09 | 73.70 | 83.20  |
| Cabo Verde | CPV | 2013 | AFR | LMIC | 89.45 | 0.97 | 88.48 | 98.66 | 74.65 | 4.82 | 69.82 | 78.92  |
| Cabo Verde | CPV | 2014 | AFR | LMIC | 86.93 | 0.95 | 85.98 | 98.60 | 68.49 | 4.43 | 64.06 | 74.51  |
| Cabo Verde | CPV | 2015 | AFR | LMIC | 88.15 | 0.78 | 87.37 | 98.62 | 71.03 | 4.59 | 66.44 | 76.04  |
| Cabo Verde | CPV | 2016 | AFR | LMIC | 87.89 | 0.80 | 87.10 | 98.62 | 70.45 | 4.55 | 65.90 | 75.66  |
| Cabo Verde | CPV | 2017 | AFR | LMIC | 86.87 | 0.90 | 85.97 | 98.60 | 68.17 | 4.41 | 63.76 | 74.17  |
| Cabo Verde | CPV | 2018 | AFR | LMIC | 86.54 | 0.72 | 85.82 | 98.58 | 66.71 | 4.31 | 62.40 | 72.71  |
| Cabo Verde | CPV | 2019 | AFR | LMIC | 86.53 | 0.72 | 85.81 | 98.58 | 66.69 | 4.31 | 62.38 | 72.69  |
| Cuba       | CUB | 2010 | AMR | UMIC | 79.09 | 0.31 | 78.78 | 99.88 | 44.28 | 2.86 | 41.42 | 52.58  |
| Cuba       | CUB | 2011 | AMR | UMIC | 79.09 | 0.31 | 78.78 | 99.89 | 44.80 | 2.90 | 41.91 | 53.20  |
| Cuba       | CUB | 2012 | AMR | UMIC | 79.09 | 0.31 | 78.78 | 99.88 | 44.94 | 2.91 | 42.04 | 53.36  |
| Cuba       | CUB | 2013 | AMR | UMIC | 79.09 | 0.32 | 78.78 | 99.90 | 45.82 | 2.96 | 42.86 | 54.41  |
| Cuba       | CUB | 2014 | AMR | UMIC | 79.09 | 0.32 | 78.77 | 99.95 | 47.33 | 3.06 | 44.27 | 56.20  |
| Cuba       | CUB | 2015 | AMR | UMIC | 79.09 | 0.32 | 78.77 | 99.96 | 47.25 | 3.05 | 44.19 | 56.10  |
| Cuba       | CUB | 2016 | AMR | UMIC | 79.09 | 0.32 | 78.77 | 99.93 | 47.03 | 3.04 | 43.99 | 55.85  |
| Cuba       | CUB | 2017 | AMR | UMIC | 90.25 | 0.29 | 89.96 | 99.96 | 63.84 | 4.13 | 59.72 | 66.38  |
| Cuba       | CUB | 2018 | AMR | UMIC | 89.31 | 0.27 | 89.05 | 99.97 | 62.68 | 4.05 | 58.63 | 65.84  |
| Cuba       | CUB | 2019 | AMR | UMIC | 89.30 | 0.27 | 89.03 | 99.97 | 62.66 | 4.05 | 58.61 | 65.83  |

|                    |     |      |     |      |       |      |       |       |       |      |       |       |
|--------------------|-----|------|-----|------|-------|------|-------|-------|-------|------|-------|-------|
| Djibouti           | DJI | 2010 | EMR | LMIC | 94.48 | 3.37 | 91.11 | 94.10 | 89.85 | 5.81 | 84.04 | 92.24 |
| Djibouti           | DJI | 2011 | EMR | LMIC | 94.44 | 3.35 | 91.09 | 94.10 | 89.71 | 5.80 | 83.92 | 92.12 |
| Djibouti           | DJI | 2012 | EMR | LMIC | 95.02 | 3.61 | 91.40 | 94.12 | 91.77 | 5.93 | 85.83 | 93.91 |
| Djibouti           | DJI | 2013 | EMR | LMIC | 93.96 | 3.14 | 90.82 | 94.09 | 88.23 | 5.70 | 82.53 | 90.87 |
| Djibouti           | DJI | 2014 | EMR | LMIC | 86.98 | 0.97 | 86.01 | 93.94 | 68.66 | 4.44 | 64.23 | 74.67 |
| Djibouti           | DJI | 2015 | EMR | LMIC | 86.62 | 0.76 | 85.86 | 93.93 | 67.06 | 4.33 | 62.72 | 73.05 |
| Djibouti           | DJI | 2016 | EMR | LMIC | 87.02 | 0.96 | 86.06 | 93.94 | 68.73 | 4.44 | 64.29 | 74.70 |
| Djibouti           | DJI | 2017 | EMR | LMIC | 85.46 | 0.49 | 84.98 | 93.88 | 63.27 | 4.09 | 59.18 | 69.64 |
| Djibouti           | DJI | 2018 | EMR | LMIC | 86.87 | 0.90 | 85.97 | 93.94 | 68.17 | 4.41 | 63.76 | 74.17 |
| Djibouti           | DJI | 2019 | EMR | LMIC | 85.48 | 0.49 | 84.99 | 93.88 | 63.31 | 4.09 | 59.21 | 69.67 |
| Dominican Republic | DOM | 2010 | AMR | UMIC | 82.70 | 0.26 | 82.44 | 98.22 | 58.33 | 3.77 | 54.56 | 66.18 |
| Dominican Republic | DOM | 2011 | AMR | UMIC | 79.76 | 0.25 | 79.51 | 98.18 | 55.35 | 3.58 | 51.78 | 65.12 |
| Dominican Republic | DOM | 2012 | AMR | UMIC | 78.50 | 0.29 | 78.21 | 98.16 | 54.40 | 3.52 | 50.88 | 65.06 |
| Dominican Republic | DOM | 2013 | AMR | UMIC | 79.90 | 0.25 | 79.65 | 98.18 | 55.47 | 3.59 | 51.89 | 65.14 |
| Dominican Republic | DOM | 2014 | AMR | UMIC | 76.90 | 0.37 | 76.53 | 98.14 | 53.36 | 3.45 | 49.92 | 65.22 |
| Dominican Republic | DOM | 2015 | AMR | UMIC | 75.59 | 0.49 | 75.11 | 98.13 | 52.62 | 3.40 | 49.22 | 65.54 |
| Dominican Republic | DOM | 2016 | AMR | UMIC | 77.63 | 0.33 | 77.30 | 98.15 | 53.81 | 3.48 | 50.34 | 65.12 |
| Dominican Republic | DOM | 2017 | AMR | UMIC | 75.73 | 0.47 | 75.26 | 98.13 | 52.70 | 3.41 | 49.29 | 65.50 |
| Dominican Republic | DOM | 2018 | AMR | UMIC | 73.21 | 1.06 | 72.15 | 98.11 | 51.46 | 3.33 | 48.13 | 66.71 |
| Dominican Republic | DOM | 2019 | AMR | UMIC | 73.64 | 0.91 | 72.73 | 98.12 | 51.65 | 3.34 | 48.31 | 66.43 |
| Ecuador            | ECU | 2010 | AMR | UMIC | 83.85 | 0.32 | 83.53 | 98.39 | 59.98 | 3.88 | 56.10 | 67.17 |
| Ecuador            | ECU | 2011 | AMR | UMIC | 81.90 | 0.24 | 81.65 | 98.35 | 57.38 | 3.71 | 53.67 | 65.73 |
| Ecuador            | ECU | 2012 | AMR | UMIC | 83.04 | 0.27 | 82.77 | 98.37 | 58.78 | 3.80 | 54.98 | 66.43 |
| Ecuador            | ECU | 2013 | AMR | UMIC | 84.06 | 0.33 | 83.73 | 98.40 | 60.34 | 3.90 | 56.44 | 67.41 |
| Ecuador            | ECU | 2014 | AMR | UMIC | 83.61 | 0.30 | 83.31 | 98.39 | 59.60 | 3.85 | 55.75 | 66.92 |
| Ecuador            | ECU | 2015 | AMR | UMIC | 82.58 | 0.26 | 82.33 | 98.37 | 58.18 | 3.76 | 54.42 | 66.10 |
| Ecuador            | ECU | 2016 | AMR | UMIC | 82.85 | 0.26 | 82.59 | 98.38 | 58.52 | 3.78 | 54.74 | 66.28 |
| Ecuador            | ECU | 2017 | AMR | UMIC | 82.39 | 0.25 | 82.14 | 98.37 | 57.94 | 3.75 | 54.20 | 65.99 |
| Ecuador            | ECU | 2018 | AMR | UMIC | 82.95 | 0.27 | 82.69 | 98.38 | 58.66 | 3.79 | 54.87 | 66.36 |
| Ecuador            | ECU | 2019 | AMR | UMIC | 81.90 | 0.24 | 81.65 | 98.36 | 57.37 | 3.71 | 53.67 | 65.73 |
| Eritrea            | ERI | 2010 | AFR | LIC  | 65.22 | 0.38 | 64.84 | 94.58 | 48.39 | 3.13 | 45.26 | 69.80 |
| Eritrea            | ERI | 2011 | AFR | LIC  | 62.66 | 0.19 | 62.48 | 94.53 | 44.00 | 2.84 | 41.15 | 65.87 |
| Eritrea            | ERI | 2012 | AFR | LIC  | 64.42 | 0.28 | 64.14 | 94.56 | 46.58 | 3.01 | 43.57 | 67.93 |
| Eritrea            | ERI | 2013 | AFR | LIC  | 64.78 | 0.32 | 64.46 | 94.56 | 47.32 | 3.06 | 44.26 | 68.66 |
| Eritrea            | ERI | 2014 | AFR | LIC  | 65.15 | 0.37 | 64.78 | 94.57 | 48.19 | 3.12 | 45.08 | 69.58 |
| Eritrea            | ERI | 2015 | AFR | LIC  | 65.15 | 0.37 | 64.78 | 94.57 | 48.19 | 3.12 | 45.08 | 69.58 |
| Eritrea            | ERI | 2016 | AFR | LIC  | 65.40 | 0.41 | 64.99 | 94.58 | 48.89 | 3.16 | 45.73 | 70.36 |
| Eritrea            | ERI | 2017 | AFR | LIC  | 66.00 | 0.56 | 65.44 | 94.60 | 50.93 | 3.29 | 47.64 | 72.79 |
| Eritrea            | ERI | 2018 | AFR | LIC  | 66.26 | 0.70 | 65.56 | 94.61 | 52.09 | 3.37 | 48.72 | 74.33 |
| Eritrea            | ERI | 2019 | AFR | LIC  | 66.20 | 0.66 | 65.54 | 94.61 | 51.81 | 3.35 | 48.46 | 73.94 |
| Ethiopia           | ETH | 2010 | AFR | LIC  | 73.51 | 0.71 | 72.80 | 65.66 | 60.68 | 3.92 | 56.76 | 77.96 |
| Ethiopia           | ETH | 2011 | AFR | LIC  | 76.70 | 0.71 | 75.99 | 70.12 | 62.98 | 4.07 | 58.91 | 77.52 |
| Ethiopia           | ETH | 2012 | AFR | LIC  | 72.96 | 0.64 | 72.32 | 65.65 | 59.17 | 3.82 | 55.35 | 76.52 |
| Ethiopia           | ETH | 2013 | AFR | LIC  | 68.40 | 0.60 | 67.80 | 59.85 | 55.24 | 3.57 | 51.67 | 76.21 |
| Ethiopia           | ETH | 2014 | AFR | LIC  | 64.09 | 0.68 | 63.41 | 55.61 | 50.39 | 3.26 | 47.13 | 74.33 |
| Ethiopia           | ETH | 2015 | AFR | LIC  | 76.90 | 0.70 | 76.21 | 71.62 | 61.64 | 3.98 | 57.65 | 75.65 |
| Ethiopia           | ETH | 2016 | AFR | LIC  | 74.55 | 0.69 | 73.86 | 68.61 | 59.55 | 3.85 | 55.70 | 75.41 |

|                                  |     |      |     |      |       |      |       |       |       |      |       |       |
|----------------------------------|-----|------|-----|------|-------|------|-------|-------|-------|------|-------|-------|
| Ethiopia                         | ETH | 2017 | AFR | LIC  | 72.82 | 0.81 | 72.01 | 67.12 | 57.43 | 3.71 | 53.71 | 74.59 |
| Ethiopia                         | ETH | 2018 | AFR | LIC  | 75.85 | 0.68 | 75.17 | 70.11 | 60.86 | 3.93 | 56.92 | 75.73 |
| Ethiopia                         | ETH | 2019 | AFR | LIC  | 78.29 | 0.69 | 77.60 | 73.14 | 63.17 | 4.08 | 59.09 | 76.14 |
| Fiji                             | FJI | 2010 | WPR | UMIC | 72.73 | 0.52 | 72.21 | 98.93 | 49.17 | 3.18 | 45.99 | 63.69 |
| Fiji                             | FJI | 2011 | WPR | UMIC | 72.73 | 0.34 | 72.39 | 98.86 | 45.66 | 2.95 | 42.71 | 59.00 |
| Fiji                             | FJI | 2012 | WPR | UMIC | 72.73 | 0.41 | 72.31 | 98.91 | 48.03 | 3.10 | 44.92 | 62.12 |
| Fiji                             | FJI | 2013 | WPR | UMIC | 72.73 | 0.36 | 72.37 | 98.88 | 46.70 | 3.02 | 43.68 | 60.36 |
| Fiji                             | FJI | 2014 | WPR | UMIC | 72.73 | 0.41 | 72.32 | 98.91 | 47.92 | 3.10 | 44.82 | 61.98 |
| Fiji                             | FJI | 2015 | WPR | UMIC | 72.73 | 0.56 | 72.17 | 98.94 | 49.43 | 3.20 | 46.24 | 64.07 |
| Fiji                             | FJI | 2016 | WPR | UMIC | 72.73 | 0.74 | 71.98 | 98.96 | 50.30 | 3.25 | 47.05 | 65.36 |
| Fiji                             | FJI | 2017 | WPR | UMIC | 72.73 | 1.02 | 71.71 | 98.97 | 50.99 | 3.30 | 47.69 | 66.51 |
| Fiji                             | FJI | 2018 | WPR | UMIC | 79.68 | 0.25 | 79.43 | 99.05 | 55.29 | 3.57 | 51.72 | 65.11 |
| Fiji                             | FJI | 2019 | WPR | UMIC | 83.01 | 0.27 | 82.74 | 99.10 | 58.74 | 3.80 | 54.95 | 66.40 |
| Micronesia (Federated States of) | FSM | 2010 | WPR | LMIC | 90.83 | 2.49 | 88.34 | 99.74 | 80.85 | 5.23 | 75.63 | 85.61 |
| Micronesia (Federated States of) | FSM | 2011 | WPR | LMIC | 80.31 | 0.24 | 80.07 | 99.47 | 55.82 | 3.61 | 52.21 | 65.21 |
| Micronesia (Federated States of) | FSM | 2012 | WPR | LMIC | 93.61 | 3.00 | 90.61 | 99.78 | 87.22 | 5.64 | 81.58 | 90.04 |
| Micronesia (Federated States of) | FSM | 2013 | WPR | LMIC | 85.55 | 0.50 | 85.05 | 99.58 | 63.49 | 4.10 | 59.39 | 69.83 |
| Micronesia (Federated States of) | FSM | 2014 | WPR | LMIC | 84.66 | 0.38 | 84.28 | 99.55 | 61.45 | 3.97 | 57.48 | 68.20 |
| Micronesia (Federated States of) | FSM | 2015 | WPR | LMIC | 82.38 | 0.25 | 82.13 | 99.50 | 57.93 | 3.74 | 54.19 | 65.98 |
| Micronesia (Federated States of) | FSM | 2016 | WPR | LMIC | 83.35 | 0.29 | 83.06 | 99.52 | 59.21 | 3.83 | 55.38 | 66.68 |
| Micronesia (Federated States of) | FSM | 2017 | WPR | LMIC | 75.82 | 0.46 | 75.36 | 99.41 | 52.75 | 3.41 | 49.34 | 65.47 |
| Micronesia (Federated States of) | FSM | 2018 | WPR | LMIC | 81.46 | 0.24 | 81.22 | 99.48 | 56.91 | 3.68 | 53.23 | 65.54 |
| Micronesia (Federated States of) | FSM | 2019 | WPR | LMIC | 72.73 | 1.18 | 71.55 | 99.38 | 51.16 | 3.31 | 47.86 | 66.88 |
| Gabon                            | GAB | 2010 | AFR | UMIC | 46.89 | 0.48 | 46.41 | 68.84 | 38.95 | 2.52 | 36.43 | 78.50 |
| Gabon                            | GAB | 2011 | AFR | UMIC | 52.59 | 0.59 | 52.00 | 79.58 | 43.98 | 2.84 | 41.13 | 79.11 |
| Gabon                            | GAB | 2012 | AFR | UMIC | 55.85 | 0.53 | 55.32 | 88.39 | 44.53 | 2.88 | 41.65 | 75.29 |
| Gabon                            | GAB | 2013 | AFR | UMIC | 56.31 | 0.49 | 55.81 | 90.61 | 43.60 | 2.82 | 40.78 | 73.07 |
| Gabon                            | GAB | 2014 | AFR | UMIC | 59.16 | 0.41 | 58.75 | 97.39 | 44.66 | 2.89 | 41.77 | 71.10 |
| Gabon                            | GAB | 2015 | AFR | UMIC | 60.77 | 0.53 | 60.23 | 97.43 | 49.22 | 3.18 | 46.04 | 76.43 |
| Gabon                            | GAB | 2016 | AFR | UMIC | 57.85 | 0.55 | 57.31 | 90.65 | 47.61 | 3.08 | 44.53 | 77.70 |
| Gabon                            | GAB | 2017 | AFR | UMIC | 54.02 | 0.81 | 53.22 | 81.78 | 46.12 | 2.98 | 43.14 | 81.06 |
| Gabon                            | GAB | 2018 | AFR | UMIC | 55.53 | 0.60 | 54.93 | 88.38 | 43.92 | 2.84 | 41.08 | 74.78 |
| Gabon                            | GAB | 2019 | AFR | UMIC | 53.72 | 0.61 | 53.11 | 81.77 | 44.95 | 2.91 | 42.04 | 79.16 |
| Georgia                          | GEO | 2010 | EUR | UMIC | 92.67 | 0.28 | 92.38 | 96.03 | 65.16 | 4.21 | 60.95 | 65.97 |
| Georgia                          | GEO | 2011 | EUR | UMIC | 93.63 | 0.28 | 93.34 | 98.99 | 65.80 | 4.25 | 61.55 | 65.94 |
| Georgia                          | GEO | 2012 | EUR | UMIC | 84.22 | 0.25 | 83.97 | 74.36 | 59.13 | 3.82 | 55.30 | 65.86 |
| Georgia                          | GEO | 2013 | EUR | UMIC | 72.09 | 0.25 | 71.84 | 54.00 | 49.97 | 3.23 | 46.74 | 65.06 |
| Georgia                          | GEO | 2014 | EUR | UMIC | 70.45 | 0.51 | 69.94 | 58.13 | 49.12 | 3.17 | 45.94 | 65.69 |
| Georgia                          | GEO | 2015 | EUR | UMIC | 75.79 | 0.38 | 75.42 | 67.06 | 52.61 | 3.40 | 49.21 | 65.25 |
| Georgia                          | GEO | 2016 | EUR | UMIC | 77.90 | 0.37 | 77.53 | 71.83 | 54.05 | 3.49 | 50.56 | 65.22 |
| Georgia                          | GEO | 2017 | EUR | UMIC | 69.14 | 1.18 | 67.96 | 60.26 | 48.70 | 3.15 | 45.56 | 67.03 |
| Georgia                          | GEO | 2018 | EUR | UMIC | 66.69 | 1.02 | 65.67 | 53.96 | 46.90 | 3.03 | 43.87 | 66.81 |
| Georgia                          | GEO | 2019 | EUR | UMIC | 67.99 | 0.61 | 67.38 | 53.97 | 47.51 | 3.07 | 44.44 | 65.96 |
| Ghana                            | GHA | 2010 | AFR | LMIC | 34.39 | 0.23 | 34.16 | 49.18 | 25.90 | 1.67 | 24.23 | 70.91 |
| Ghana                            | GHA | 2011 | AFR | LMIC | 36.87 | 0.35 | 36.52 | 52.39 | 28.75 | 1.86 | 26.89 | 73.64 |
| Ghana                            | GHA | 2012 | AFR | LMIC | 35.55 | 0.26 | 35.29 | 50.78 | 26.97 | 1.74 | 25.23 | 71.49 |
| Ghana                            | GHA | 2013 | AFR | LMIC | 36.12 | 0.18 | 35.94 | 52.37 | 26.40 | 1.71 | 24.69 | 68.71 |

|                   |     |      |     |      |       |      |       |       |       |      |       |       |
|-------------------|-----|------|-----|------|-------|------|-------|-------|-------|------|-------|-------|
| Ghana             | GHA | 2014 | AFR | LMIC | 35.49 | 0.24 | 35.24 | 50.78 | 26.77 | 1.73 | 25.04 | 71.04 |
| Ghana             | GHA | 2015 | AFR | LMIC | 35.34 | 0.31 | 35.03 | 49.19 | 28.60 | 1.85 | 26.75 | 76.36 |
| Ghana             | GHA | 2016 | AFR | LMIC | 32.31 | 0.10 | 32.21 | 49.15 | 22.49 | 1.45 | 21.04 | 65.32 |
| Ghana             | GHA | 2017 | AFR | LMIC | 34.10 | 0.18 | 33.92 | 49.17 | 25.10 | 1.62 | 23.48 | 69.21 |
| Ghana             | GHA | 2018 | AFR | LMIC | 34.77 | 0.38 | 34.39 | 49.19 | 27.38 | 1.77 | 25.61 | 74.46 |
| Ghana             | GHA | 2019 | AFR | LMIC | 36.72 | 0.29 | 36.43 | 52.39 | 28.12 | 1.82 | 26.31 | 72.20 |
| Guinea            | GIN | 2010 | AFR | LIC  | 64.84 | 0.70 | 64.14 | 63.17 | 54.09 | 3.50 | 50.59 | 78.88 |
| Guinea            | GIN | 2011 | AFR | LIC  | 67.79 | 1.32 | 66.46 | 66.99 | 58.80 | 3.80 | 55.00 | 82.76 |
| Guinea            | GIN | 2012 | AFR | LIC  | 69.53 | 2.05 | 67.47 | 67.02 | 63.70 | 4.12 | 59.58 | 88.31 |
| Guinea            | GIN | 2013 | AFR | LIC  | 70.78 | 3.10 | 67.69 | 65.14 | 70.79 | 4.58 | 66.21 | 97.82 |
| Guinea            | GIN | 2014 | AFR | LIC  | 67.61 | 1.09 | 66.52 | 66.99 | 57.98 | 3.75 | 54.23 | 81.53 |
| Guinea            | GIN | 2015 | AFR | LIC  | 67.72 | 1.24 | 66.49 | 66.99 | 58.50 | 3.78 | 54.72 | 82.30 |
| Guinea            | GIN | 2016 | AFR | LIC  | 70.46 | 2.05 | 68.41 | 68.96 | 64.25 | 4.15 | 60.10 | 87.85 |
| Guinea            | GIN | 2017 | AFR | LIC  | 75.25 | 2.21 | 73.03 | 76.94 | 68.84 | 4.45 | 64.39 | 88.16 |
| Guinea            | GIN | 2018 | AFR | LIC  | 75.96 | 2.41 | 73.55 | 76.95 | 70.59 | 4.56 | 66.03 | 89.77 |
| Guinea            | GIN | 2019 | AFR | LIC  | 85.85 | 2.91 | 82.93 | 94.00 | 80.82 | 5.22 | 75.60 | 91.15 |
| Guinea-Bissau     | GNB | 2010 | AFR | LIC  | 44.32 | 0.39 | 43.93 | 97.55 | 36.11 | 2.33 | 33.78 | 76.90 |
| Guinea-Bissau     | GNB | 2011 | AFR | LIC  | 40.00 | 0.33 | 39.68 | 89.60 | 30.77 | 1.99 | 28.78 | 72.54 |
| Guinea-Bissau     | GNB | 2012 | AFR | LIC  | 35.94 | 0.38 | 35.56 | 79.13 | 28.43 | 1.84 | 26.59 | 74.80 |
| Guinea-Bissau     | GNB | 2013 | AFR | LIC  | 36.57 | 0.13 | 36.44 | 84.31 | 26.06 | 1.68 | 24.37 | 66.89 |
| Guinea-Bissau     | GNB | 2014 | AFR | LIC  | 38.99 | 0.16 | 38.83 | 89.56 | 28.11 | 1.82 | 26.29 | 67.71 |
| Guinea-Bissau     | GNB | 2015 | AFR | LIC  | 35.89 | 0.15 | 35.73 | 81.70 | 25.93 | 1.68 | 24.26 | 67.88 |
| Guinea-Bissau     | GNB | 2016 | AFR | LIC  | 37.61 | 0.25 | 37.36 | 84.34 | 28.29 | 1.83 | 26.46 | 70.84 |
| Guinea-Bissau     | GNB | 2017 | AFR | LIC  | 36.15 | 0.18 | 35.97 | 81.71 | 26.47 | 1.71 | 24.76 | 68.84 |
| Guinea-Bissau     | GNB | 2018 | AFR | LIC  | 31.93 | 0.16 | 31.77 | 71.31 | 23.45 | 1.52 | 21.93 | 69.03 |
| Guinea-Bissau     | GNB | 2019 | AFR | LIC  | 37.21 | 0.19 | 37.03 | 84.32 | 27.25 | 1.76 | 25.49 | 68.84 |
| Equatorial Guinea | GNQ | 2010 | AFR | UMIC | 60.91 | 0.24 | 60.67 | 99.42 | 33.00 | 2.13 | 30.87 | 50.88 |
| Equatorial Guinea | GNQ | 2011 | AFR | UMIC | 60.00 | 0.24 | 59.76 | 97.17 | 33.26 | 2.15 | 31.11 | 52.05 |
| Equatorial Guinea | GNQ | 2012 | AFR | UMIC | 59.09 | 0.23 | 58.86 | 94.93 | 32.73 | 2.12 | 30.62 | 52.02 |
| Equatorial Guinea | GNQ | 2013 | AFR | UMIC | 59.09 | 0.23 | 58.86 | 94.93 | 33.09 | 2.14 | 30.95 | 52.59 |
| Equatorial Guinea | GNQ | 2014 | AFR | UMIC | 58.18 | 0.23 | 57.95 | 92.74 | 34.02 | 2.20 | 31.82 | 54.91 |
| Equatorial Guinea | GNQ | 2015 | AFR | UMIC | 58.18 | 0.31 | 57.87 | 92.83 | 38.10 | 2.46 | 35.64 | 61.58 |
| Equatorial Guinea | GNQ | 2016 | AFR | UMIC | 61.42 | 0.39 | 61.02 | 95.13 | 42.76 | 2.76 | 39.99 | 65.54 |
| Equatorial Guinea | GNQ | 2017 | AFR | UMIC | 57.27 | 0.29 | 56.98 | 90.60 | 37.09 | 2.40 | 34.69 | 60.88 |
| Equatorial Guinea | GNQ | 2018 | AFR | UMIC | 51.53 | 0.64 | 50.89 | 75.69 | 36.15 | 2.34 | 33.81 | 66.44 |
| Equatorial Guinea | GNQ | 2019 | AFR | UMIC | 57.27 | 0.44 | 56.84 | 90.64 | 38.92 | 2.52 | 36.41 | 64.06 |
| Guatemala         | GTM | 2010 | AMR | UMIC | 87.74 | 0.81 | 86.93 | 97.69 | 70.13 | 4.53 | 65.60 | 75.46 |
| Guatemala         | GTM | 2011 | AMR | UMIC | 80.41 | 0.24 | 80.17 | 97.50 | 55.91 | 3.61 | 52.29 | 65.23 |
| Guatemala         | GTM | 2012 | AMR | UMIC | 86.33 | 0.65 | 85.67 | 97.64 | 65.91 | 4.26 | 61.65 | 71.96 |
| Guatemala         | GTM | 2013 | AMR | UMIC | 83.87 | 0.32 | 83.55 | 97.57 | 60.01 | 3.88 | 56.13 | 67.18 |
| Guatemala         | GTM | 2014 | AMR | UMIC | 78.58 | 0.28 | 78.30 | 97.48 | 54.46 | 3.52 | 50.94 | 65.06 |
| Guatemala         | GTM | 2015 | AMR | UMIC | 84.04 | 0.33 | 83.71 | 97.57 | 60.31 | 3.90 | 56.41 | 67.38 |
| Guatemala         | GTM | 2016 | AMR | UMIC | 84.67 | 0.38 | 84.28 | 97.59 | 61.45 | 3.97 | 57.48 | 68.20 |
| Guatemala         | GTM | 2017 | AMR | UMIC | 84.02 | 0.33 | 83.69 | 97.57 | 60.26 | 3.89 | 56.36 | 67.35 |
| Guatemala         | GTM | 2018 | AMR | UMIC | 83.03 | 0.27 | 82.76 | 97.55 | 58.76 | 3.80 | 54.96 | 66.41 |
| Guatemala         | GTM | 2019 | AMR | UMIC | 82.30 | 0.25 | 82.05 | 97.53 | 57.84 | 3.74 | 54.10 | 65.94 |
| Guyana            | GUY | 2010 | AMR | UMIC | 84.89 | 0.41 | 84.48 | 98.24 | 61.91 | 4.00 | 57.91 | 68.55 |
| Guyana            | GUY | 2011 | AMR | UMIC | 85.21 | 0.45 | 84.76 | 98.25 | 62.64 | 4.05 | 58.59 | 69.12 |

|           |     |      |     |      |       |      |       |       |       |      |       |       |
|-----------|-----|------|-----|------|-------|------|-------|-------|-------|------|-------|-------|
| Guyana    | GUY | 2012 | AMR | UMIC | 83.75 | 0.31 | 83.44 | 98.21 | 59.82 | 3.87 | 55.96 | 67.06 |
| Guyana    | GUY | 2013 | AMR | UMIC | 83.54 | 0.30 | 83.24 | 98.21 | 59.50 | 3.85 | 55.65 | 66.85 |
| Guyana    | GUY | 2014 | AMR | UMIC | 84.56 | 0.37 | 84.18 | 98.23 | 61.24 | 3.96 | 57.28 | 68.04 |
| Guyana    | GUY | 2015 | AMR | UMIC | 83.21 | 0.28 | 82.94 | 98.20 | 59.02 | 3.81 | 55.21 | 66.56 |
| Guyana    | GUY | 2016 | AMR | UMIC | 83.16 | 0.28 | 82.88 | 98.20 | 58.94 | 3.81 | 55.13 | 66.52 |
| Guyana    | GUY | 2017 | AMR | UMIC | 83.04 | 0.27 | 82.77 | 98.20 | 58.78 | 3.80 | 54.98 | 66.43 |
| Guyana    | GUY | 2018 | AMR | UMIC | 82.42 | 0.25 | 82.16 | 98.19 | 57.98 | 3.75 | 54.23 | 66.00 |
| Guyana    | GUY | 2019 | AMR | UMIC | 82.34 | 0.25 | 82.09 | 98.19 | 57.88 | 3.74 | 54.14 | 65.96 |
| Honduras  | HND | 2010 | AMR | LMIC | 85.02 | 0.42 | 84.60 | 99.00 | 62.21 | 4.02 | 58.19 | 68.78 |
| Honduras  | HND | 2011 | AMR | LMIC | 84.61 | 0.38 | 84.23 | 98.99 | 61.35 | 3.97 | 57.38 | 68.12 |
| Honduras  | HND | 2012 | AMR | LMIC | 84.87 | 0.40 | 84.46 | 99.00 | 61.87 | 4.00 | 57.87 | 68.52 |
| Honduras  | HND | 2013 | AMR | LMIC | 85.68 | 0.52 | 85.16 | 99.02 | 63.86 | 4.13 | 59.73 | 70.14 |
| Honduras  | HND | 2014 | AMR | LMIC | 83.22 | 0.28 | 82.94 | 98.96 | 59.03 | 3.82 | 55.21 | 66.57 |
| Honduras  | HND | 2015 | AMR | LMIC | 84.03 | 0.33 | 83.70 | 98.98 | 60.28 | 3.90 | 56.39 | 67.37 |
| Honduras  | HND | 2016 | AMR | LMIC | 83.39 | 0.29 | 83.10 | 98.96 | 59.27 | 3.83 | 55.44 | 66.71 |
| Honduras  | HND | 2017 | AMR | LMIC | 82.24 | 0.25 | 81.99 | 98.94 | 57.77 | 3.73 | 54.04 | 65.90 |
| Honduras  | HND | 2018 | AMR | LMIC | 83.90 | 0.32 | 83.58 | 98.97 | 60.06 | 3.88 | 56.18 | 67.22 |
| Honduras  | HND | 2019 | AMR | LMIC | 79.97 | 0.25 | 79.72 | 98.91 | 55.53 | 3.59 | 51.94 | 65.15 |
| Haiti     | HTI | 2010 | AMR | LIC  | 72.14 | 2.20 | 69.94 | 61.02 | 66.52 | 4.30 | 62.22 | 88.97 |
| Haiti     | HTI | 2011 | AMR | LIC  | 73.82 | 0.75 | 73.07 | 72.21 | 57.87 | 3.74 | 54.13 | 74.08 |
| Haiti     | HTI | 2012 | AMR | LIC  | 83.76 | 0.74 | 83.03 | 88.62 | 67.53 | 4.36 | 63.16 | 76.07 |
| Haiti     | HTI | 2013 | AMR | LIC  | 86.93 | 0.77 | 86.16 | 95.15 | 69.88 | 4.52 | 65.36 | 75.86 |
| Haiti     | HTI | 2014 | AMR | LIC  | 84.17 | 1.09 | 83.08 | 86.52 | 71.11 | 4.60 | 66.51 | 80.05 |
| Haiti     | HTI | 2015 | AMR | LIC  | 85.75 | 0.77 | 84.98 | 92.95 | 68.82 | 4.45 | 64.37 | 75.75 |
| Haiti     | HTI | 2016 | AMR | LIC  | 82.94 | 0.73 | 82.21 | 86.49 | 67.31 | 4.35 | 62.96 | 76.58 |
| Haiti     | HTI | 2017 | AMR | LIC  | 82.13 | 0.78 | 81.35 | 86.48 | 65.49 | 4.23 | 61.26 | 75.29 |
| Haiti     | HTI | 2018 | AMR | LIC  | 76.71 | 0.71 | 76.00 | 74.21 | 63.01 | 4.07 | 58.94 | 77.55 |
| Haiti     | HTI | 2019 | AMR | LIC  | 73.81 | 0.74 | 73.07 | 72.21 | 57.80 | 3.74 | 54.07 | 74.00 |
| Indonesia | IDN | 2010 | SEA | UMIC | 40.55 | 0.63 | 39.91 | 36.86 | 34.71 | 2.24 | 32.46 | 81.33 |
| Indonesia | IDN | 2011 | SEA | UMIC | 43.06 | 1.04 | 42.02 | 40.18 | 37.90 | 2.45 | 35.45 | 84.37 |
| Indonesia | IDN | 2012 | SEA | UMIC | 44.14 | 0.99 | 43.16 | 41.87 | 38.65 | 2.50 | 36.15 | 83.76 |
| Indonesia | IDN | 2013 | SEA | UMIC | 44.91 | 1.28 | 43.63 | 41.88 | 40.79 | 2.64 | 38.15 | 87.45 |
| Indonesia | IDN | 2014 | SEA | UMIC | 43.09 | 1.09 | 42.00 | 40.18 | 38.07 | 2.46 | 35.61 | 84.78 |
| Indonesia | IDN | 2015 | SEA | UMIC | 44.31 | 1.27 | 43.04 | 41.88 | 39.59 | 2.56 | 37.03 | 86.03 |
| Indonesia | IDN | 2016 | SEA | UMIC | 48.21 | 0.60 | 47.62 | 48.91 | 40.60 | 2.62 | 37.97 | 79.75 |
| Indonesia | IDN | 2017 | SEA | UMIC | 58.53 | 0.88 | 57.65 | 66.20 | 49.99 | 3.23 | 46.76 | 81.10 |
| Indonesia | IDN | 2018 | SEA | UMIC | 75.65 | 1.42 | 74.23 | 99.11 | 65.46 | 4.23 | 61.22 | 82.48 |
| Indonesia | IDN | 2019 | SEA | UMIC | 75.95 | 1.88 | 74.07 | 99.12 | 67.02 | 4.33 | 62.69 | 84.63 |
| India     | IND | 2010 | SEA | LMIC | 51.00 | 1.51 | 49.49 | 24.40 | 46.75 | 3.02 | 43.73 | 88.35 |
| India     | IND | 2011 | SEA | LMIC | 50.44 | 1.44 | 49.00 | 24.39 | 45.56 | 2.94 | 42.61 | 86.96 |
| India     | IND | 2012 | SEA | LMIC | 49.22 | 1.41 | 47.82 | 23.29 | 44.38 | 2.87 | 41.52 | 86.82 |
| India     | IND | 2013 | SEA | LMIC | 48.65 | 1.06 | 47.60 | 23.28 | 42.50 | 2.75 | 39.75 | 83.52 |
| India     | IND | 2014 | SEA | LMIC | 63.42 | 1.46 | 61.95 | 39.66 | 55.64 | 3.60 | 52.05 | 84.01 |
| India     | IND | 2015 | SEA | LMIC | 65.88 | 0.68 | 65.19 | 44.04 | 54.74 | 3.54 | 51.21 | 78.54 |
| India     | IND | 2016 | SEA | LMIC | 70.42 | 0.76 | 69.66 | 50.26 | 58.70 | 3.79 | 54.91 | 78.82 |
| India     | IND | 2017 | SEA | LMIC | 66.15 | 0.58 | 65.57 | 45.54 | 53.35 | 3.45 | 49.91 | 76.11 |
| India     | IND | 2018 | SEA | LMIC | 79.40 | 0.87 | 78.53 | 63.96 | 66.28 | 4.28 | 62.00 | 78.95 |
| India     | IND | 2019 | SEA | LMIC | 92.16 | 1.28 | 90.88 | 85.53 | 78.24 | 5.06 | 73.18 | 80.52 |

|                            |     |      |     |      |        |      |       |       |       |      |       |       |
|----------------------------|-----|------|-----|------|--------|------|-------|-------|-------|------|-------|-------|
| Iran (Islamic Republic of) | IRN | 2010 | EMR | UMIC | 87.76  | 0.81 | 86.95 | 99.82 | 70.17 | 4.54 | 65.64 | 75.49 |
| Iran (Islamic Republic of) | IRN | 2011 | EMR | UMIC | 90.14  | 1.44 | 88.69 | 99.86 | 77.27 | 4.99 | 72.27 | 81.49 |
| Iran (Islamic Republic of) | IRN | 2012 | EMR | UMIC | 77.65  | 0.33 | 77.33 | 99.63 | 53.83 | 3.48 | 50.35 | 65.12 |
| Iran (Islamic Republic of) | IRN | 2013 | EMR | UMIC | 78.74  | 0.28 | 78.47 | 99.64 | 54.58 | 3.53 | 51.05 | 65.06 |
| Iran (Islamic Republic of) | IRN | 2014 | EMR | UMIC | 83.65  | 0.30 | 83.35 | 99.72 | 59.66 | 3.86 | 55.81 | 66.96 |
| Iran (Islamic Republic of) | IRN | 2015 | EMR | UMIC | 84.85  | 0.40 | 84.45 | 99.75 | 61.84 | 4.00 | 57.85 | 68.50 |
| Iran (Islamic Republic of) | IRN | 2016 | EMR | UMIC | 84.67  | 0.38 | 84.29 | 99.74 | 61.46 | 3.97 | 57.49 | 68.21 |
| Iran (Islamic Republic of) | IRN | 2017 | EMR | UMIC | 84.83  | 0.40 | 84.43 | 99.75 | 61.80 | 3.99 | 57.80 | 68.46 |
| Iran (Islamic Republic of) | IRN | 2018 | EMR | UMIC | 85.47  | 0.49 | 84.98 | 99.77 | 63.27 | 4.09 | 59.18 | 69.64 |
| Iran (Islamic Republic of) | IRN | 2019 | EMR | UMIC | 87.62  | 0.83 | 86.79 | 99.83 | 69.87 | 4.52 | 65.36 | 75.31 |
| Iraq                       | IRQ | 2010 | EMR | UMIC | 72.44  | 0.22 | 72.22 | 98.12 | 50.38 | 3.26 | 47.12 | 65.25 |
| Iraq                       | IRQ | 2011 | EMR | UMIC | 64.36  | 0.19 | 64.16 | 80.53 | 44.75 | 2.89 | 41.86 | 65.24 |
| Iraq                       | IRQ | 2012 | EMR | UMIC | 60.00  | 0.21 | 59.78 | 74.28 | 41.58 | 2.69 | 38.89 | 65.06 |
| Iraq                       | IRQ | 2013 | EMR | UMIC | 57.09  | 0.20 | 56.89 | 68.25 | 39.57 | 2.56 | 37.01 | 65.06 |
| Iraq                       | IRQ | 2014 | EMR | UMIC | 54.63  | 0.18 | 54.45 | 62.44 | 37.89 | 2.45 | 35.44 | 65.09 |
| Iraq                       | IRQ | 2015 | EMR | UMIC | 52.53  | 0.17 | 52.35 | 58.68 | 36.42 | 2.35 | 34.07 | 65.08 |
| Iraq                       | IRQ | 2016 | EMR | UMIC | 45.90  | 0.14 | 45.75 | 46.27 | 31.86 | 2.06 | 29.80 | 65.13 |
| Iraq                       | IRQ | 2017 | EMR | UMIC | 48.38  | 0.14 | 48.24 | 49.70 | 33.67 | 2.18 | 31.49 | 65.28 |
| Iraq                       | IRQ | 2018 | EMR | UMIC | 44.14  | 0.13 | 44.00 | 42.94 | 30.67 | 1.98 | 28.69 | 65.20 |
| Iraq                       | IRQ | 2019 | EMR | UMIC | 41.00  | 0.13 | 40.88 | 38.14 | 28.47 | 1.84 | 26.63 | 65.16 |
| Jordan                     | JOR | 2010 | EMR | UMIC | 72.73  | 1.11 | 71.61 | 98.84 | 51.10 | 3.30 | 47.80 | 66.75 |
| Jordan                     | JOR | 2011 | EMR | UMIC | 72.73  | 1.07 | 71.65 | 98.84 | 51.06 | 3.30 | 47.76 | 66.65 |
| Jordan                     | JOR | 2012 | EMR | UMIC | 72.73  | 0.98 | 71.75 | 98.84 | 50.92 | 3.29 | 47.63 | 66.39 |
| Jordan                     | JOR | 2013 | EMR | UMIC | 72.73  | 0.98 | 71.75 | 98.84 | 50.93 | 3.29 | 47.64 | 66.39 |
| Jordan                     | JOR | 2014 | EMR | UMIC | 73.84  | 0.84 | 73.00 | 98.86 | 51.75 | 3.34 | 48.40 | 66.30 |
| Jordan                     | JOR | 2015 | EMR | UMIC | 75.37  | 0.51 | 74.85 | 98.87 | 52.51 | 3.39 | 49.11 | 65.61 |
| Jordan                     | JOR | 2016 | EMR | UMIC | 75.43  | 0.51 | 74.92 | 98.87 | 52.54 | 3.40 | 49.14 | 65.59 |
| Jordan                     | JOR | 2017 | EMR | UMIC | 78.21  | 0.30 | 77.91 | 98.89 | 54.20 | 3.50 | 50.70 | 65.07 |
| Jordan                     | JOR | 2018 | EMR | UMIC | 75.84  | 0.46 | 75.38 | 98.87 | 52.76 | 3.41 | 49.35 | 65.47 |
| Jordan                     | JOR | 2019 | EMR | UMIC | 73.92  | 0.82 | 73.09 | 98.85 | 51.78 | 3.35 | 48.44 | 66.26 |
| Kazakhstan                 | KAZ | 2010 | EUR | UMIC | 93.72  | 0.72 | 93.00 | 62.32 | 65.38 | 4.23 | 61.15 | 65.76 |
| Kazakhstan                 | KAZ | 2011 | EUR | UMIC | 100.00 | 1.75 | 98.25 | 95.31 | 70.46 | 4.55 | 65.91 | 67.08 |
| Kazakhstan                 | KAZ | 2012 | EUR | UMIC | 80.00  | 0.63 | 79.37 | 35.18 | 54.50 | 3.52 | 50.98 | 64.23 |
| Kazakhstan                 | KAZ | 2013 | EUR | UMIC | 90.91  | 0.53 | 90.38 | 62.21 | 60.27 | 3.90 | 56.38 | 62.38 |
| Kazakhstan                 | KAZ | 2014 | EUR | UMIC | 88.18  | 0.52 | 87.67 | 54.30 | 58.43 | 3.78 | 54.66 | 62.35 |
| Kazakhstan                 | KAZ | 2015 | EUR | UMIC | 90.00  | 0.47 | 89.53 | 59.46 | 58.57 | 3.79 | 54.78 | 61.19 |
| Kazakhstan                 | KAZ | 2016 | EUR | UMIC | 85.45  | 0.59 | 84.87 | 47.21 | 57.55 | 3.72 | 53.83 | 63.43 |
| Kazakhstan                 | KAZ | 2017 | EUR | UMIC | 90.91  | 0.61 | 90.30 | 62.23 | 61.07 | 3.95 | 57.12 | 63.25 |
| Kazakhstan                 | KAZ | 2018 | EUR | UMIC | 90.91  | 0.60 | 90.31 | 62.23 | 61.02 | 3.94 | 57.07 | 63.20 |
| Kazakhstan                 | KAZ | 2019 | EUR | UMIC | 89.09  | 0.66 | 88.43 | 56.88 | 60.40 | 3.90 | 56.50 | 63.89 |
| Kenya                      | KEN | 2010 | AFR | LMIC | 53.07  | 1.86 | 51.21 | 58.29 | 50.29 | 3.25 | 47.04 | 91.85 |
| Kenya                      | KEN | 2011 | AFR | LMIC | 51.23  | 1.48 | 49.75 | 58.27 | 45.93 | 2.97 | 42.96 | 86.35 |
| Kenya                      | KEN | 2012 | AFR | LMIC | 52.16  | 1.54 | 50.62 | 58.27 | 47.81 | 3.09 | 44.72 | 88.35 |
| Kenya                      | KEN | 2013 | AFR | LMIC | 51.09  | 1.41 | 49.69 | 58.26 | 45.49 | 2.94 | 42.55 | 85.64 |
| Kenya                      | KEN | 2014 | AFR | LMIC | 50.35  | 0.57 | 49.79 | 58.24 | 42.11 | 2.72 | 39.39 | 79.12 |
| Kenya                      | KEN | 2015 | AFR | LMIC | 49.71  | 0.43 | 49.27 | 58.23 | 40.25 | 2.60 | 37.64 | 76.40 |
| Kenya                      | KEN | 2016 | AFR | LMIC | 49.36  | 0.46 | 48.91 | 58.23 | 39.47 | 2.55 | 36.92 | 75.48 |

|                                  |     |      |     |      |       |      |       |       |       |      |       |       |
|----------------------------------|-----|------|-----|------|-------|------|-------|-------|-------|------|-------|-------|
| Kenya                            | KEN | 2017 | AFR | LMIC | 57.99 | 0.58 | 57.41 | 70.81 | 48.03 | 3.10 | 44.92 | 78.24 |
| Kenya                            | KEN | 2018 | AFR | LMIC | 70.37 | 0.74 | 69.63 | 91.77 | 58.53 | 3.78 | 54.75 | 78.63 |
| Kenya                            | KEN | 2019 | AFR | LMIC | 65.10 | 0.64 | 64.46 | 85.88 | 50.89 | 3.29 | 47.60 | 73.84 |
| Kyrgyzstan                       | KGZ | 2010 | EUR | LMIC | 85.60 | 0.30 | 85.29 | 95.09 | 59.33 | 3.83 | 55.49 | 65.06 |
| Kyrgyzstan                       | KGZ | 2011 | EUR | LMIC | 86.13 | 0.29 | 85.85 | 95.09 | 59.72 | 3.86 | 55.86 | 65.07 |
| Kyrgyzstan                       | KGZ | 2012 | EUR | LMIC | 81.05 | 0.73 | 80.32 | 95.04 | 56.63 | 3.66 | 52.97 | 65.95 |
| Kyrgyzstan                       | KGZ | 2013 | EUR | LMIC | 81.75 | 0.59 | 81.16 | 95.05 | 56.99 | 3.68 | 53.30 | 65.68 |
| Kyrgyzstan                       | KGZ | 2014 | EUR | LMIC | 80.64 | 0.83 | 79.82 | 95.04 | 56.44 | 3.65 | 52.79 | 66.14 |
| Kyrgyzstan                       | KGZ | 2015 | EUR | LMIC | 82.47 | 0.50 | 81.98 | 95.06 | 57.37 | 3.71 | 53.67 | 65.46 |
| Kyrgyzstan                       | KGZ | 2016 | EUR | LMIC | 83.96 | 0.38 | 83.58 | 95.07 | 58.24 | 3.76 | 54.47 | 65.17 |
| Kyrgyzstan                       | KGZ | 2017 | EUR | LMIC | 81.12 | 0.71 | 80.41 | 95.04 | 56.67 | 3.66 | 53.01 | 65.92 |
| Kyrgyzstan                       | KGZ | 2018 | EUR | LMIC | 89.02 | 0.27 | 88.75 | 95.13 | 62.35 | 4.03 | 58.32 | 65.71 |
| Kyrgyzstan                       | KGZ | 2019 | EUR | LMIC | 90.66 | 0.31 | 90.35 | 95.16 | 64.43 | 4.16 | 60.26 | 66.70 |
| Cambodia                         | KHM | 2010 | WPR | LMIC | 70.40 | 0.63 | 69.78 | 56.20 | 54.59 | 3.53 | 51.06 | 73.18 |
| Cambodia                         | KHM | 2011 | WPR | LMIC | 67.20 | 0.62 | 66.58 | 51.66 | 52.26 | 3.38 | 48.88 | 73.42 |
| Cambodia                         | KHM | 2012 | WPR | LMIC | 71.51 | 0.65 | 70.86 | 57.76 | 55.52 | 3.59 | 51.93 | 73.29 |
| Cambodia                         | KHM | 2013 | WPR | LMIC | 68.29 | 0.63 | 67.66 | 53.16 | 53.13 | 3.43 | 49.70 | 73.45 |
| Cambodia                         | KHM | 2014 | WPR | LMIC | 80.09 | 0.68 | 79.41 | 70.85 | 61.88 | 4.00 | 57.88 | 72.90 |
| Cambodia                         | KHM | 2015 | WPR | LMIC | 66.62 | 0.45 | 66.17 | 51.64 | 50.12 | 3.24 | 46.88 | 70.84 |
| Cambodia                         | KHM | 2016 | WPR | LMIC | 65.50 | 0.43 | 65.07 | 50.17 | 49.18 | 3.18 | 46.00 | 70.69 |
| Cambodia                         | KHM | 2017 | WPR | LMIC | 69.79 | 0.46 | 69.33 | 56.19 | 52.38 | 3.39 | 49.00 | 70.67 |
| Cambodia                         | KHM | 2018 | WPR | LMIC | 61.17 | 0.39 | 60.77 | 44.44 | 45.83 | 2.96 | 42.87 | 70.54 |
| Cambodia                         | KHM | 2019 | WPR | LMIC | 67.68 | 0.45 | 67.23 | 53.14 | 50.89 | 3.29 | 47.60 | 70.80 |
| Kiribati                         | KIR | 2010 | WPR | LMIC | 84.22 | 0.35 | 83.88 | 97.98 | 60.62 | 3.92 | 56.70 | 67.60 |
| Kiribati                         | KIR | 2011 | WPR | LMIC | 82.95 | 0.27 | 82.69 | 97.96 | 58.66 | 3.79 | 54.87 | 66.36 |
| Kiribati                         | KIR | 2012 | WPR | LMIC | 83.45 | 0.29 | 83.16 | 97.96 | 59.36 | 3.84 | 55.52 | 66.77 |
| Kiribati                         | KIR | 2013 | WPR | LMIC | 84.93 | 0.41 | 84.52 | 98.00 | 62.00 | 4.01 | 58.00 | 68.62 |
| Kiribati                         | KIR | 2014 | WPR | LMIC | 82.03 | 0.25 | 81.78 | 97.94 | 57.52 | 3.72 | 53.81 | 65.79 |
| Kiribati                         | KIR | 2015 | WPR | LMIC | 90.40 | 1.80 | 88.61 | 98.14 | 78.52 | 5.08 | 73.44 | 82.89 |
| Kiribati                         | KIR | 2016 | WPR | LMIC | 89.31 | 0.92 | 88.39 | 98.11 | 74.19 | 4.80 | 69.40 | 78.51 |
| Kiribati                         | KIR | 2017 | WPR | LMIC | 83.25 | 0.28 | 82.97 | 97.96 | 59.07 | 3.82 | 55.25 | 66.59 |
| Kiribati                         | KIR | 2018 | WPR | LMIC | 84.43 | 0.36 | 84.07 | 97.99 | 61.00 | 3.94 | 57.05 | 67.87 |
| Kiribati                         | KIR | 2019 | WPR | LMIC | 85.36 | 0.47 | 84.89 | 98.01 | 63.00 | 4.07 | 58.93 | 69.42 |
| Lao People's Democratic Republic | LAO | 2010 | WPR | LMIC | 30.78 | 0.15 | 30.63 | 35.15 | 22.47 | 1.45 | 21.01 | 68.60 |
| Lao People's Democratic Republic | LAO | 2011 | WPR | LMIC | 34.15 | 0.19 | 33.96 | 40.33 | 25.23 | 1.63 | 23.60 | 69.47 |
| Lao People's Democratic Republic | LAO | 2012 | WPR | LMIC | 32.53 | 0.13 | 32.41 | 38.57 | 23.31 | 1.51 | 21.81 | 67.29 |
| Lao People's Democratic Republic | LAO | 2013 | WPR | LMIC | 33.80 | 0.15 | 33.66 | 40.32 | 24.46 | 1.58 | 22.88 | 67.97 |
| Lao People's Democratic Republic | LAO | 2014 | WPR | LMIC | 37.43 | 0.22 | 37.21 | 45.71 | 27.79 | 1.80 | 25.99 | 69.85 |
| Lao People's Democratic Republic | LAO | 2015 | WPR | LMIC | 39.50 | 0.22 | 39.28 | 49.40 | 29.19 | 1.89 | 27.30 | 69.51 |
| Lao People's Democratic Republic | LAO | 2016 | WPR | LMIC | 44.93 | 0.26 | 44.66 | 58.97 | 33.37 | 2.16 | 31.21 | 69.89 |
| Lao People's Democratic Republic | LAO | 2017 | WPR | LMIC | 52.92 | 0.41 | 52.50 | 73.15 | 40.52 | 2.62 | 37.90 | 72.18 |
| Lao People's Democratic Republic | LAO | 2018 | WPR | LMIC | 61.49 | 0.46 | 61.03 | 90.34 | 46.88 | 3.03 | 43.85 | 71.86 |
| Lao People's Democratic Republic | LAO | 2019 | WPR | LMIC | 65.86 | 0.51 | 65.35 | 99.32 | 50.40 | 3.26 | 47.14 | 72.13 |
| Lebanon                          | LBN | 2010 | EMR | UMIC | 89.41 | 0.27 | 89.14 | 98.40 | 62.79 | 4.06 | 58.73 | 65.89 |
| Lebanon                          | LBN | 2011 | EMR | UMIC | 89.86 | 0.28 | 89.58 | 98.41 | 63.34 | 4.09 | 59.24 | 66.13 |
| Lebanon                          | LBN | 2012 | EMR | UMIC | 89.61 | 0.27 | 89.33 | 98.41 | 63.03 | 4.07 | 58.95 | 65.99 |
| Lebanon                          | LBN | 2013 | EMR | UMIC | 79.09 | 0.61 | 78.48 | 98.25 | 53.79 | 3.48 | 50.31 | 64.11 |

|             |     |      |     |      |       |      |       |       |       |      |       |       |
|-------------|-----|------|-----|------|-------|------|-------|-------|-------|------|-------|-------|
| Lebanon     | LBN | 2014 | EMR | UMIC | 83.12 | 0.44 | 82.68 | 98.32 | 57.73 | 3.73 | 54.00 | 65.32 |
| Lebanon     | LBN | 2015 | EMR | UMIC | 81.98 | 0.56 | 81.43 | 98.31 | 57.11 | 3.69 | 53.42 | 65.60 |
| Lebanon     | LBN | 2016 | EMR | UMIC | 86.22 | 0.29 | 85.93 | 98.36 | 59.79 | 3.86 | 55.92 | 65.08 |
| Lebanon     | LBN | 2017 | EMR | UMIC | 85.76 | 0.30 | 85.46 | 98.37 | 59.44 | 3.84 | 55.60 | 65.06 |
| Lebanon     | LBN | 2018 | EMR | UMIC | 85.95 | 0.29 | 85.66 | 98.35 | 59.58 | 3.85 | 55.73 | 65.06 |
| Lebanon     | LBN | 2019 | EMR | UMIC | 87.41 | 0.26 | 87.15 | 98.37 | 60.77 | 3.93 | 56.84 | 65.22 |
| Liberia     | LBR | 2010 | AFR | LIC  | 64.95 | 0.75 | 64.19 | 69.11 | 54.45 | 3.52 | 50.93 | 79.34 |
| Liberia     | LBR | 2011 | AFR | LIC  | 74.84 | 1.89 | 72.95 | 85.26 | 66.14 | 4.28 | 61.87 | 84.81 |
| Liberia     | LBR | 2012 | AFR | LIC  | 70.16 | 0.65 | 69.51 | 81.05 | 56.04 | 3.62 | 52.42 | 75.41 |
| Liberia     | LBR | 2013 | AFR | LIC  | 67.84 | 2.64 | 65.19 | 67.25 | 65.91 | 4.26 | 61.65 | 94.57 |
| Liberia     | LBR | 2014 | AFR | LIC  | 41.95 | 1.05 | 40.90 | 33.32 | 37.04 | 2.39 | 34.65 | 84.72 |
| Liberia     | LBR | 2015 | AFR | LIC  | 49.19 | 1.59 | 47.60 | 40.95 | 45.93 | 2.97 | 42.96 | 90.25 |
| Liberia     | LBR | 2016 | AFR | LIC  | 58.56 | 1.90 | 56.66 | 54.35 | 54.67 | 3.53 | 51.13 | 90.24 |
| Liberia     | LBR | 2017 | AFR | LIC  | 57.35 | 0.49 | 56.87 | 59.66 | 44.28 | 2.86 | 41.42 | 72.84 |
| Liberia     | LBR | 2018 | AFR | LIC  | 61.71 | 1.90 | 59.82 | 59.74 | 56.99 | 3.68 | 53.31 | 89.11 |
| Liberia     | LBR | 2019 | AFR | LIC  | 60.80 | 0.93 | 59.87 | 61.55 | 51.99 | 3.36 | 48.63 | 81.23 |
| Saint Lucia | LCA | 2010 | AMR | UMIC | 79.09 | 0.94 | 78.15 | 99.08 | 55.06 | 3.56 | 51.50 | 65.90 |
| Saint Lucia | LCA | 2011 | AMR | UMIC | 79.09 | 0.75 | 78.34 | 99.07 | 54.48 | 3.52 | 50.96 | 65.05 |
| Saint Lucia | LCA | 2012 | AMR | UMIC | 79.09 | 0.87 | 78.22 | 99.07 | 54.90 | 3.55 | 51.35 | 65.65 |
| Saint Lucia | LCA | 2013 | AMR | UMIC | 79.09 | 0.55 | 78.54 | 99.04 | 53.37 | 3.45 | 49.92 | 63.57 |
| Saint Lucia | LCA | 2014 | AMR | UMIC | 79.09 | 0.44 | 78.65 | 99.02 | 52.15 | 3.37 | 48.78 | 62.02 |
| Saint Lucia | LCA | 2015 | AMR | UMIC | 79.09 | 0.80 | 78.29 | 99.07 | 54.67 | 3.53 | 51.14 | 65.32 |
| Saint Lucia | LCA | 2016 | AMR | UMIC | 79.09 | 0.42 | 78.67 | 99.01 | 51.65 | 3.34 | 48.31 | 61.40 |
| Saint Lucia | LCA | 2017 | AMR | UMIC | 79.09 | 0.44 | 78.65 | 99.02 | 52.12 | 3.37 | 48.75 | 61.98 |
| Saint Lucia | LCA | 2018 | AMR | UMIC | 79.09 | 0.44 | 78.65 | 99.02 | 52.12 | 3.37 | 48.75 | 61.99 |
| Saint Lucia | LCA | 2019 | AMR | UMIC | 79.09 | 0.61 | 78.48 | 99.05 | 53.80 | 3.48 | 50.33 | 64.13 |
| Sri Lanka   | LKA | 2010 | SEA | LMIC | 78.57 | 0.38 | 78.19 | 96.34 | 57.38 | 3.71 | 53.67 | 68.64 |
| Sri Lanka   | LKA | 2011 | SEA | LMIC | 79.91 | 0.42 | 79.49 | 98.63 | 58.79 | 3.80 | 54.99 | 69.18 |
| Sri Lanka   | LKA | 2012 | SEA | LMIC | 71.18 | 0.35 | 70.83 | 80.78 | 52.04 | 3.36 | 48.68 | 68.72 |
| Sri Lanka   | LKA | 2013 | SEA | LMIC | 72.44 | 0.38 | 72.06 | 82.93 | 53.27 | 3.44 | 49.83 | 69.15 |
| Sri Lanka   | LKA | 2014 | SEA | LMIC | 73.46 | 0.38 | 73.08 | 85.11 | 53.94 | 3.49 | 50.46 | 69.04 |
| Sri Lanka   | LKA | 2015 | SEA | LMIC | 71.90 | 0.32 | 71.58 | 82.92 | 52.11 | 3.37 | 48.74 | 68.09 |
| Sri Lanka   | LKA | 2016 | SEA | LMIC | 66.46 | 0.22 | 66.24 | 74.45 | 47.06 | 3.04 | 44.02 | 66.45 |
| Sri Lanka   | LKA | 2017 | SEA | LMIC | 63.74 | 0.23 | 63.51 | 68.38 | 45.42 | 2.94 | 42.49 | 66.90 |
| Sri Lanka   | LKA | 2018 | SEA | LMIC | 67.62 | 0.30 | 67.32 | 74.47 | 48.94 | 3.16 | 45.77 | 67.99 |
| Sri Lanka   | LKA | 2019 | SEA | LMIC | 65.06 | 0.35 | 64.71 | 68.41 | 47.97 | 3.10 | 44.87 | 69.35 |
| Lesotho     | LSO | 2010 | AFR | LMIC | 54.94 | 0.68 | 54.26 | 64.94 | 46.25 | 2.99 | 43.26 | 79.73 |
| Lesotho     | LSO | 2011 | AFR | LMIC | 59.76 | 1.71 | 58.06 | 69.59 | 54.14 | 3.50 | 50.64 | 87.23 |
| Lesotho     | LSO | 2012 | AFR | LMIC | 55.96 | 0.51 | 55.44 | 68.00 | 44.76 | 2.89 | 41.86 | 75.51 |
| Lesotho     | LSO | 2013 | AFR | LMIC | 56.09 | 0.71 | 55.38 | 66.48 | 47.30 | 3.06 | 44.24 | 79.89 |
| Lesotho     | LSO | 2014 | AFR | LMIC | 57.98 | 1.69 | 56.29 | 68.04 | 51.90 | 3.35 | 48.54 | 86.24 |
| Lesotho     | LSO | 2015 | AFR | LMIC | 55.96 | 2.19 | 53.77 | 61.93 | 54.44 | 3.52 | 50.92 | 94.72 |
| Lesotho     | LSO | 2016 | AFR | LMIC | 54.65 | 0.55 | 54.11 | 64.94 | 45.28 | 2.93 | 42.35 | 78.28 |
| Lesotho     | LSO | 2017 | AFR | LMIC | 53.89 | 0.39 | 53.50 | 66.44 | 40.97 | 2.65 | 38.32 | 71.63 |
| Lesotho     | LSO | 2018 | AFR | LMIC | 55.99 | 0.51 | 55.48 | 68.00 | 44.83 | 2.90 | 41.93 | 75.58 |
| Lesotho     | LSO | 2019 | AFR | LMIC | 54.33 | 0.29 | 54.04 | 67.97 | 39.95 | 2.58 | 37.37 | 69.14 |
| Morocco     | MAR | 2010 | EMR | LMIC | 96.44 | 0.86 | 95.59 | 97.25 | 78.68 | 5.09 | 73.59 | 76.99 |
| Morocco     | MAR | 2011 | EMR | LMIC | 94.54 | 1.04 | 93.50 | 97.22 | 74.51 | 4.82 | 69.70 | 74.54 |



|                     |     |      |     |      |       |      |       |       |       |      |       |        |
|---------------------|-----|------|-----|------|-------|------|-------|-------|-------|------|-------|--------|
| Morocco             | MAR | 2012 | EMR | LMIC | 94.41 | 0.94 | 93.48 | 97.21 | 73.88 | 4.78 | 69.11 | 73.93  |
| Morocco             | MAR | 2013 | EMR | LMIC | 94.12 | 0.79 | 93.33 | 97.20 | 72.59 | 4.69 | 67.89 | 72.75  |
| Morocco             | MAR | 2014 | EMR | LMIC | 94.18 | 0.81 | 93.37 | 97.20 | 72.84 | 4.71 | 68.14 | 72.98  |
| Morocco             | MAR | 2015 | EMR | LMIC | 94.60 | 1.05 | 93.55 | 97.22 | 74.69 | 4.83 | 69.86 | 74.68  |
| Morocco             | MAR | 2016 | EMR | LMIC | 95.54 | 0.87 | 94.67 | 97.23 | 76.52 | 4.95 | 71.58 | 75.61  |
| Morocco             | MAR | 2017 | EMR | LMIC | 94.74 | 1.02 | 93.72 | 97.22 | 74.93 | 4.84 | 70.09 | 74.79  |
| Morocco             | MAR | 2018 | EMR | LMIC | 95.19 | 0.92 | 94.27 | 97.23 | 75.80 | 4.90 | 70.90 | 75.21  |
| Morocco             | MAR | 2019 | EMR | LMIC | 94.47 | 0.98 | 93.49 | 97.21 | 74.14 | 4.79 | 69.35 | 74.18  |
| Republic of Moldova | MDA | 2010 | EUR | LMIC | 86.01 | 0.29 | 85.72 | 88.19 | 59.63 | 3.85 | 55.78 | 65.07  |
| Republic of Moldova | MDA | 2011 | EUR | LMIC | 85.29 | 0.32 | 84.98 | 88.18 | 59.11 | 3.82 | 55.29 | 65.06  |
| Republic of Moldova | MDA | 2012 | EUR | LMIC | 84.57 | 0.35 | 84.22 | 88.18 | 58.62 | 3.79 | 54.83 | 65.11  |
| Republic of Moldova | MDA | 2013 | EUR | LMIC | 84.30 | 0.36 | 83.94 | 88.17 | 58.45 | 3.78 | 54.67 | 65.13  |
| Republic of Moldova | MDA | 2014 | EUR | LMIC | 79.09 | 1.00 | 78.09 | 88.12 | 55.22 | 3.57 | 51.65 | 66.14  |
| Republic of Moldova | MDA | 2015 | EUR | LMIC | 80.95 | 0.75 | 80.20 | 88.14 | 56.58 | 3.66 | 52.93 | 66.00  |
| Republic of Moldova | MDA | 2016 | EUR | LMIC | 79.09 | 1.09 | 78.00 | 88.12 | 55.42 | 3.58 | 51.83 | 66.45  |
| Republic of Moldova | MDA | 2017 | EUR | LMIC | 79.09 | 0.73 | 78.37 | 88.10 | 54.38 | 3.51 | 50.86 | 64.90  |
| Republic of Moldova | MDA | 2018 | EUR | LMIC | 79.09 | 0.71 | 78.38 | 88.10 | 54.32 | 3.51 | 50.81 | 64.83  |
| Republic of Moldova | MDA | 2019 | EUR | LMIC | 79.09 | 0.81 | 78.29 | 88.11 | 54.70 | 3.54 | 51.16 | 65.35  |
| Madagascar          | MDG | 2010 | AFR | LIC  | 58.32 | 3.29 | 55.03 | 73.06 | 62.33 | 4.03 | 58.30 | 105.96 |
| Madagascar          | MDG | 2011 | AFR | LIC  | 56.32 | 0.89 | 55.44 | 76.97 | 48.24 | 3.12 | 45.12 | 81.40  |
| Madagascar          | MDG | 2012 | AFR | LIC  | 55.41 | 1.15 | 54.25 | 74.98 | 48.27 | 3.12 | 45.15 | 83.21  |
| Madagascar          | MDG | 2013 | AFR | LIC  | 59.22 | 2.18 | 57.04 | 77.02 | 56.75 | 3.67 | 53.08 | 93.06  |
| Madagascar          | MDG | 2014 | AFR | LIC  | 61.71 | 2.33 | 59.39 | 81.05 | 59.47 | 3.84 | 55.63 | 93.67  |
| Madagascar          | MDG | 2015 | AFR | LIC  | 61.73 | 2.33 | 59.40 | 81.05 | 59.54 | 3.85 | 55.69 | 93.76  |
| Madagascar          | MDG | 2016 | AFR | LIC  | 58.39 | 1.84 | 56.55 | 77.00 | 54.20 | 3.50 | 50.70 | 89.65  |
| Madagascar          | MDG | 2017 | AFR | LIC  | 62.57 | 2.22 | 60.35 | 83.08 | 59.45 | 3.84 | 55.61 | 92.14  |
| Madagascar          | MDG | 2018 | AFR | LIC  | 65.13 | 2.39 | 62.74 | 87.19 | 62.37 | 4.03 | 58.34 | 93.00  |
| Madagascar          | MDG | 2019 | AFR | LIC  | 70.51 | 2.89 | 67.61 | 95.55 | 69.47 | 4.49 | 64.98 | 96.11  |
| Maldives            | MDV | 2010 | SEA | UMIC | 72.73 | 0.29 | 72.44 | 99.68 | 41.47 | 2.68 | 38.79 | 53.55  |
| Maldives            | MDV | 2011 | SEA | UMIC | 73.50 | 0.96 | 72.55 | 99.85 | 51.59 | 3.33 | 48.26 | 66.52  |
| Maldives            | MDV | 2012 | SEA | UMIC | 81.72 | 0.24 | 81.47 | 99.90 | 57.18 | 3.70 | 53.48 | 65.64  |
| Maldives            | MDV | 2013 | SEA | UMIC | 82.67 | 0.26 | 82.41 | 99.91 | 58.29 | 3.77 | 54.52 | 66.16  |
| Maldives            | MDV | 2014 | SEA | UMIC | 78.93 | 0.27 | 78.66 | 99.89 | 54.71 | 3.54 | 51.17 | 65.06  |
| Maldives            | MDV | 2015 | SEA | UMIC | 82.19 | 0.25 | 81.94 | 99.91 | 57.71 | 3.73 | 53.98 | 65.87  |
| Maldives            | MDV | 2016 | SEA | UMIC | 81.63 | 0.24 | 81.39 | 99.96 | 57.09 | 3.69 | 53.40 | 65.61  |
| Maldives            | MDV | 2017 | SEA | UMIC | 78.81 | 0.28 | 78.53 | 99.96 | 54.62 | 3.53 | 51.09 | 65.06  |
| Maldives            | MDV | 2018 | SEA | UMIC | 78.36 | 0.29 | 78.07 | 99.97 | 54.31 | 3.51 | 50.80 | 65.07  |
| Maldives            | MDV | 2019 | SEA | UMIC | 78.29 | 0.30 | 78.00 | 99.98 | 54.26 | 3.51 | 50.75 | 65.07  |
| Mexico              | MEX | 2010 | AMR | UMIC | 82.50 | 0.25 | 82.25 | 99.21 | 58.08 | 3.75 | 54.33 | 66.05  |
| Mexico              | MEX | 2011 | AMR | UMIC | 82.75 | 0.26 | 82.49 | 99.22 | 58.40 | 3.77 | 54.62 | 66.22  |
| Mexico              | MEX | 2012 | AMR | UMIC | 82.53 | 0.25 | 82.27 | 99.21 | 58.12 | 3.76 | 54.36 | 66.07  |
| Mexico              | MEX | 2013 | AMR | UMIC | 81.90 | 0.24 | 81.65 | 99.20 | 57.38 | 3.71 | 53.67 | 65.73  |
| Mexico              | MEX | 2014 | AMR | UMIC | 80.64 | 0.24 | 80.40 | 99.18 | 56.11 | 3.63 | 52.49 | 65.28  |
| Mexico              | MEX | 2015 | AMR | UMIC | 82.32 | 0.25 | 82.06 | 99.21 | 57.86 | 3.74 | 54.12 | 65.94  |
| Mexico              | MEX | 2016 | AMR | UMIC | 82.84 | 0.26 | 82.58 | 99.22 | 58.51 | 3.78 | 54.73 | 66.28  |
| Mexico              | MEX | 2017 | AMR | UMIC | 82.72 | 0.26 | 82.46 | 99.22 | 58.36 | 3.77 | 54.59 | 66.19  |
| Mexico              | MEX | 2018 | AMR | UMIC | 83.02 | 0.27 | 82.75 | 99.22 | 58.75 | 3.80 | 54.95 | 66.41  |
| Mexico              | MEX | 2019 | AMR | UMIC | 82.75 | 0.26 | 82.49 | 99.22 | 58.40 | 3.77 | 54.62 | 66.22  |

|                  |     |      |     |      |       |      |       |       |       |      |       |        |
|------------------|-----|------|-----|------|-------|------|-------|-------|-------|------|-------|--------|
| Marshall Islands | MHL | 2010 | WPR | UMIC | 72.73 | 0.38 | 72.34 | 99.70 | 47.45 | 3.07 | 44.38 | 61.35  |
| Marshall Islands | MHL | 2011 | WPR | UMIC | 72.73 | 0.31 | 72.42 | 99.65 | 44.05 | 2.85 | 41.21 | 56.90  |
| Marshall Islands | MHL | 2012 | WPR | UMIC | 72.73 | 0.72 | 72.01 | 99.76 | 50.22 | 3.25 | 46.97 | 65.23  |
| Marshall Islands | MHL | 2013 | WPR | UMIC | 73.13 | 1.10 | 72.03 | 99.77 | 51.42 | 3.32 | 48.10 | 66.77  |
| Marshall Islands | MHL | 2014 | WPR | UMIC | 73.11 | 1.10 | 72.01 | 99.77 | 51.41 | 3.32 | 48.09 | 66.78  |
| Marshall Islands | MHL | 2015 | WPR | UMIC | 72.73 | 1.15 | 71.58 | 99.81 | 51.14 | 3.31 | 47.84 | 66.83  |
| Marshall Islands | MHL | 2016 | WPR | UMIC | 79.63 | 0.26 | 79.38 | 99.83 | 55.25 | 3.57 | 51.68 | 65.11  |
| Marshall Islands | MHL | 2017 | WPR | UMIC | 72.73 | 0.79 | 71.94 | 99.76 | 50.44 | 3.26 | 47.18 | 65.59  |
| Marshall Islands | MHL | 2018 | WPR | UMIC | 75.99 | 0.44 | 75.55 | 99.78 | 52.84 | 3.42 | 49.43 | 65.42  |
| Marshall Islands | MHL | 2019 | WPR | UMIC | 76.26 | 0.42 | 75.84 | 99.79 | 52.99 | 3.43 | 49.57 | 65.36  |
| North Macedonia  | MKD | 2010 | EUR | UMIC | 78.04 | 0.31 | 77.74 | 98.89 | 54.09 | 3.50 | 50.59 | 65.08  |
| North Macedonia  | MKD | 2011 | EUR | UMIC | 83.61 | 0.30 | 83.31 | 98.96 | 59.60 | 3.85 | 55.75 | 66.92  |
| North Macedonia  | MKD | 2012 | EUR | UMIC | 75.64 | 0.48 | 75.16 | 98.86 | 52.65 | 3.40 | 49.25 | 65.52  |
| North Macedonia  | MKD | 2013 | EUR | UMIC | 74.13 | 0.77 | 73.36 | 98.85 | 51.88 | 3.35 | 48.53 | 66.15  |
| North Macedonia  | MKD | 2014 | EUR | UMIC | 72.73 | 0.76 | 71.97 | 98.82 | 50.35 | 3.25 | 47.10 | 65.44  |
| North Macedonia  | MKD | 2015 | EUR | UMIC | 72.73 | 0.57 | 72.16 | 98.81 | 49.51 | 3.20 | 46.31 | 64.17  |
| North Macedonia  | MKD | 2016 | EUR | UMIC | 72.73 | 0.70 | 72.02 | 98.82 | 50.16 | 3.24 | 46.92 | 65.15  |
| North Macedonia  | MKD | 2017 | EUR | UMIC | 72.73 | 0.65 | 72.08 | 98.82 | 49.91 | 3.23 | 46.69 | 64.77  |
| North Macedonia  | MKD | 2018 | EUR | UMIC | 72.73 | 0.50 | 72.22 | 98.80 | 49.02 | 3.17 | 45.85 | 63.48  |
| North Macedonia  | MKD | 2019 | EUR | UMIC | 72.73 | 0.45 | 72.27 | 98.79 | 48.53 | 3.14 | 45.39 | 62.81  |
| Mali             | MLI | 2010 | AFR | LIC  | 66.23 | 2.40 | 63.83 | 72.58 | 63.22 | 4.09 | 59.13 | 92.64  |
| Mali             | MLI | 2011 | AFR | LIC  | 66.64 | 2.12 | 64.52 | 74.54 | 61.99 | 4.01 | 57.98 | 89.87  |
| Mali             | MLI | 2012 | AFR | LIC  | 64.66 | 1.87 | 62.79 | 72.56 | 58.93 | 3.81 | 55.12 | 87.80  |
| Mali             | MLI | 2013 | AFR | LIC  | 68.27 | 2.00 | 66.27 | 78.53 | 62.41 | 4.03 | 58.38 | 88.10  |
| Mali             | MLI | 2014 | AFR | LIC  | 70.17 | 2.24 | 67.93 | 80.56 | 65.31 | 4.22 | 61.09 | 89.93  |
| Mali             | MLI | 2015 | AFR | LIC  | 77.16 | 2.03 | 75.12 | 97.35 | 68.43 | 4.42 | 64.01 | 85.20  |
| Mali             | MLI | 2016 | AFR | LIC  | 72.38 | 0.37 | 72.00 | 97.23 | 53.12 | 3.43 | 49.69 | 69.00  |
| Mali             | MLI | 2017 | AFR | LIC  | 67.29 | 0.38 | 66.91 | 86.61 | 49.79 | 3.22 | 46.57 | 69.60  |
| Mali             | MLI | 2018 | AFR | LIC  | 73.04 | 0.48 | 72.56 | 97.25 | 54.90 | 3.55 | 51.35 | 70.77  |
| Mali             | MLI | 2019 | AFR | LIC  | 72.83 | 0.82 | 72.01 | 95.12 | 57.47 | 3.71 | 53.75 | 74.65  |
| Myanmar          | MMR | 2010 | SEA | LMIC | 63.23 | 3.63 | 59.60 | 34.17 | 67.98 | 4.39 | 63.59 | 106.69 |
| Myanmar          | MMR | 2011 | SEA | LMIC | 66.47 | 2.51 | 63.96 | 39.25 | 64.07 | 4.14 | 59.93 | 93.69  |
| Myanmar          | MMR | 2012 | SEA | LMIC | 73.50 | 3.49 | 70.00 | 46.11 | 74.90 | 4.84 | 70.06 | 100.08 |
| Myanmar          | MMR | 2013 | SEA | LMIC | 70.25 | 2.27 | 67.98 | 44.68 | 65.54 | 4.24 | 61.30 | 90.17  |
| Myanmar          | MMR | 2014 | SEA | LMIC | 74.68 | 2.34 | 72.34 | 50.44 | 69.22 | 4.47 | 64.75 | 89.50  |
| Myanmar          | MMR | 2015 | SEA | LMIC | 78.43 | 2.52 | 75.90 | 54.98 | 73.13 | 4.73 | 68.40 | 90.12  |
| Myanmar          | MMR | 2016 | SEA | LMIC | 78.61 | 1.05 | 77.56 | 59.65 | 66.54 | 4.30 | 62.24 | 80.24  |
| Myanmar          | MMR | 2017 | SEA | LMIC | 78.11 | 1.76 | 76.35 | 58.07 | 68.41 | 4.42 | 63.99 | 83.81  |
| Myanmar          | MMR | 2018 | SEA | LMIC | 85.97 | 1.84 | 84.13 | 69.63 | 75.03 | 4.85 | 70.18 | 83.42  |
| Myanmar          | MMR | 2019 | SEA | LMIC | 86.92 | 1.60 | 85.32 | 71.36 | 75.11 | 4.85 | 70.25 | 82.34  |
| Montenegro       | MNE | 2010 | EUR | UMIC | 79.09 | 0.80 | 78.29 | 99.04 | 54.68 | 3.53 | 51.15 | 65.33  |
| Montenegro       | MNE | 2011 | EUR | UMIC | 79.09 | 0.62 | 78.47 | 99.03 | 53.87 | 3.48 | 50.39 | 64.22  |
| Montenegro       | MNE | 2012 | EUR | UMIC | 79.09 | 0.91 | 78.18 | 99.05 | 54.99 | 3.55 | 51.44 | 65.79  |
| Montenegro       | MNE | 2013 | EUR | UMIC | 84.89 | 0.33 | 84.56 | 99.12 | 58.83 | 3.80 | 55.03 | 65.08  |
| Montenegro       | MNE | 2014 | EUR | UMIC | 79.09 | 0.52 | 78.57 | 99.01 | 53.07 | 3.43 | 49.64 | 63.18  |
| Montenegro       | MNE | 2015 | EUR | UMIC | 79.09 | 0.45 | 78.64 | 98.99 | 52.29 | 3.38 | 48.91 | 62.20  |
| Montenegro       | MNE | 2016 | EUR | UMIC | 79.09 | 0.70 | 78.39 | 99.03 | 54.28 | 3.51 | 50.77 | 64.77  |
| Montenegro       | MNE | 2017 | EUR | UMIC | 79.09 | 0.62 | 78.47 | 99.03 | 53.85 | 3.48 | 50.37 | 64.19  |

|            |     |      |     |      |       |      |       |       |       |      |       |       |
|------------|-----|------|-----|------|-------|------|-------|-------|-------|------|-------|-------|
| Montenegro | MNE | 2018 | EUR | UMIC | 79.09 | 0.69 | 78.40 | 99.03 | 54.22 | 3.50 | 50.72 | 64.69 |
| Montenegro | MNE | 2019 | EUR | UMIC | 79.09 | 0.68 | 78.41 | 99.03 | 54.18 | 3.50 | 50.68 | 64.64 |
| Mongolia   | MNG | 2010 | WPR | LMIC | 39.86 | 0.15 | 39.71 | 49.16 | 28.55 | 1.85 | 26.71 | 67.25 |
| Mongolia   | MNG | 2011 | WPR | LMIC | 37.49 | 0.13 | 37.36 | 46.36 | 26.62 | 1.72 | 24.90 | 66.64 |
| Mongolia   | MNG | 2012 | WPR | LMIC | 35.01 | 0.11 | 34.90 | 43.58 | 24.62 | 1.59 | 23.03 | 65.97 |
| Mongolia   | MNG | 2013 | WPR | LMIC | 36.20 | 0.11 | 36.09 | 44.97 | 25.55 | 1.65 | 23.90 | 66.21 |
| Mongolia   | MNG | 2014 | WPR | LMIC | 36.52 | 0.11 | 36.41 | 46.35 | 25.47 | 1.65 | 23.82 | 65.43 |
| Mongolia   | MNG | 2015 | WPR | LMIC | 36.72 | 0.11 | 36.61 | 46.35 | 25.68 | 1.66 | 24.02 | 65.60 |
| Mongolia   | MNG | 2016 | WPR | LMIC | 34.98 | 0.11 | 34.88 | 43.58 | 24.59 | 1.59 | 23.00 | 65.94 |
| Mongolia   | MNG | 2017 | WPR | LMIC | 32.62 | 0.10 | 32.52 | 40.81 | 22.80 | 1.47 | 21.33 | 65.58 |
| Mongolia   | MNG | 2018 | WPR | LMIC | 28.94 | 0.09 | 28.85 | 36.68 | 20.09 | 1.30 | 18.79 | 65.13 |
| Mongolia   | MNG | 2019 | WPR | LMIC | 30.99 | 0.10 | 30.89 | 39.42 | 21.52 | 1.39 | 20.12 | 65.15 |
| Mozambique | MOZ | 2010 | AFR | LIC  | 59.48 | 1.70 | 57.78 | 24.13 | 53.58 | 3.46 | 50.12 | 86.74 |
| Mozambique | MOZ | 2011 | AFR | LIC  | 56.51 | 0.50 | 56.01 | 22.99 | 46.05 | 2.98 | 43.07 | 76.90 |
| Mozambique | MOZ | 2012 | AFR | LIC  | 60.20 | 1.71 | 58.50 | 25.28 | 53.74 | 3.47 | 50.26 | 85.92 |
| Mozambique | MOZ | 2013 | AFR | LIC  | 67.78 | 2.15 | 65.63 | 31.55 | 63.00 | 4.07 | 58.93 | 89.78 |
| Mozambique | MOZ | 2014 | AFR | LIC  | 68.22 | 0.75 | 67.47 | 35.66 | 56.98 | 3.68 | 53.30 | 78.99 |
| Mozambique | MOZ | 2015 | AFR | LIC  | 68.15 | 1.93 | 66.22 | 34.27 | 60.83 | 3.93 | 56.90 | 85.92 |
| Mozambique | MOZ | 2016 | AFR | LIC  | 82.20 | 2.35 | 79.85 | 53.58 | 73.90 | 4.78 | 69.12 | 86.57 |
| Mozambique | MOZ | 2017 | AFR | LIC  | 94.13 | 2.40 | 91.73 | 75.90 | 83.25 | 5.38 | 77.86 | 84.88 |
| Mozambique | MOZ | 2018 | AFR | LIC  | 97.93 | 1.47 | 96.46 | 85.15 | 83.61 | 5.40 | 78.21 | 81.08 |
| Mozambique | MOZ | 2019 | AFR | LIC  | 99.43 | 1.96 | 97.47 | 87.58 | 86.31 | 5.58 | 80.73 | 82.82 |
| Mauritania | MRT | 2010 | AFR | LMIC | 57.51 | 0.50 | 57.01 | 73.02 | 46.69 | 3.02 | 43.67 | 76.61 |
| Mauritania | MRT | 2011 | AFR | LMIC | 44.10 | 0.92 | 43.18 | 49.73 | 38.42 | 2.48 | 35.94 | 83.22 |
| Mauritania | MRT | 2012 | AFR | LMIC | 64.55 | 0.61 | 63.93 | 84.51 | 53.15 | 3.44 | 49.72 | 77.77 |
| Mauritania | MRT | 2013 | AFR | LMIC | 56.99 | 0.61 | 56.38 | 71.16 | 47.48 | 3.07 | 44.41 | 78.77 |
| Mauritania | MRT | 2014 | AFR | LMIC | 61.22 | 0.58 | 60.64 | 78.71 | 50.45 | 3.26 | 47.19 | 77.82 |
| Mauritania | MRT | 2015 | AFR | LMIC | 55.55 | 0.51 | 55.04 | 69.30 | 45.56 | 2.94 | 42.61 | 77.42 |
| Mauritania | MRT | 2016 | AFR | LMIC | 62.18 | 0.56 | 61.61 | 80.63 | 50.91 | 3.29 | 47.62 | 77.29 |
| Mauritania | MRT | 2017 | AFR | LMIC | 64.97 | 0.57 | 64.40 | 86.45 | 52.29 | 3.38 | 48.91 | 75.95 |
| Mauritania | MRT | 2018 | AFR | LMIC | 66.24 | 0.87 | 65.37 | 86.47 | 56.01 | 3.62 | 52.39 | 80.14 |
| Mauritania | MRT | 2019 | AFR | LMIC | 68.45 | 0.60 | 67.85 | 92.38 | 55.36 | 3.58 | 51.78 | 76.32 |
| Malawi     | MWI | 2010 | AFR | LIC  | 48.79 | 1.28 | 47.51 | 57.10 | 43.24 | 2.80 | 40.45 | 85.14 |
| Malawi     | MWI | 2011 | AFR | LIC  | 46.39 | 1.00 | 45.38 | 53.36 | 40.51 | 2.62 | 37.89 | 83.49 |
| Malawi     | MWI | 2012 | AFR | LIC  | 51.12 | 1.47 | 49.66 | 60.91 | 45.68 | 2.95 | 42.73 | 86.04 |
| Malawi     | MWI | 2013 | AFR | LIC  | 48.41 | 0.74 | 47.68 | 57.09 | 41.39 | 2.68 | 38.71 | 81.19 |
| Malawi     | MWI | 2014 | AFR | LIC  | 50.58 | 1.44 | 49.14 | 59.00 | 45.84 | 2.96 | 42.88 | 87.26 |
| Malawi     | MWI | 2015 | AFR | LIC  | 55.68 | 1.66 | 54.03 | 66.77 | 51.11 | 3.30 | 47.81 | 88.48 |
| Malawi     | MWI | 2016 | AFR | LIC  | 54.21 | 0.27 | 53.94 | 72.66 | 39.68 | 2.56 | 37.12 | 68.81 |
| Malawi     | MWI | 2017 | AFR | LIC  | 61.20 | 0.26 | 60.94 | 87.22 | 44.21 | 2.86 | 41.35 | 67.85 |
| Malawi     | MWI | 2018 | AFR | LIC  | 60.59 | 0.51 | 60.08 | 83.02 | 46.74 | 3.02 | 43.72 | 72.77 |
| Malawi     | MWI | 2019 | AFR | LIC  | 67.36 | 0.72 | 66.63 | 95.94 | 53.00 | 3.43 | 49.58 | 74.40 |
| Malaysia   | MYS | 2010 | WPR | UMIC | 90.89 | 0.32 | 90.56 | 98.30 | 64.76 | 4.19 | 60.58 | 66.89 |
| Malaysia   | MYS | 2011 | WPR | UMIC | 90.23 | 0.29 | 89.93 | 98.29 | 63.81 | 4.12 | 59.69 | 66.37 |
| Malaysia   | MYS | 2012 | WPR | UMIC | 89.83 | 0.28 | 89.56 | 98.28 | 63.30 | 4.09 | 59.21 | 66.12 |
| Malaysia   | MYS | 2013 | WPR | UMIC | 91.35 | 0.36 | 91.00 | 98.31 | 65.51 | 4.23 | 61.27 | 67.33 |
| Malaysia   | MYS | 2014 | WPR | UMIC | 85.77 | 0.30 | 85.47 | 98.22 | 59.45 | 3.84 | 55.61 | 65.06 |
| Malaysia   | MYS | 2015 | WPR | UMIC | 86.37 | 0.28 | 86.09 | 98.23 | 59.90 | 3.87 | 56.03 | 65.09 |

|           |     |      |     |      |       |      |       |       |       |      |       |        |
|-----------|-----|------|-----|------|-------|------|-------|-------|-------|------|-------|--------|
| Malaysia  | MYS | 2016 | WPR | UMIC | 89.21 | 0.27 | 88.94 | 98.27 | 62.56 | 4.04 | 58.51 | 65.79  |
| Malaysia  | MYS | 2017 | WPR | UMIC | 89.20 | 0.27 | 88.93 | 98.27 | 62.55 | 4.04 | 58.51 | 65.79  |
| Malaysia  | MYS | 2018 | WPR | UMIC | 90.60 | 0.31 | 90.29 | 98.30 | 64.34 | 4.16 | 60.18 | 66.65  |
| Malaysia  | MYS | 2019 | WPR | UMIC | 90.76 | 0.32 | 90.44 | 98.30 | 64.56 | 4.17 | 60.39 | 66.77  |
| Namibia   | NAM | 2010 | AFR | UMIC | 60.62 | 0.18 | 60.44 | 87.18 | 42.22 | 2.73 | 39.49 | 65.33  |
| Namibia   | NAM | 2011 | AFR | UMIC | 63.07 | 0.20 | 62.87 | 89.40 | 44.49 | 2.88 | 41.62 | 66.19  |
| Namibia   | NAM | 2012 | AFR | UMIC | 57.95 | 0.26 | 57.68 | 87.15 | 40.19 | 2.60 | 37.59 | 65.17  |
| Namibia   | NAM | 2013 | AFR | UMIC | 61.59 | 0.19 | 61.40 | 87.20 | 43.22 | 2.79 | 40.42 | 65.84  |
| Namibia   | NAM | 2014 | AFR | UMIC | 60.13 | 0.18 | 59.95 | 85.01 | 42.02 | 2.72 | 39.31 | 65.57  |
| Namibia   | NAM | 2015 | AFR | UMIC | 63.67 | 0.24 | 63.44 | 98.32 | 44.13 | 2.85 | 41.28 | 65.06  |
| Namibia   | NAM | 2016 | AFR | UMIC | 60.81 | 0.22 | 60.59 | 91.58 | 42.14 | 2.72 | 39.42 | 65.06  |
| Namibia   | NAM | 2017 | AFR | UMIC | 57.27 | 0.80 | 56.47 | 93.77 | 40.15 | 2.60 | 37.55 | 66.50  |
| Namibia   | NAM | 2018 | AFR | UMIC | 60.01 | 0.21 | 59.80 | 89.36 | 41.59 | 2.69 | 38.90 | 65.06  |
| Namibia   | NAM | 2019 | AFR | UMIC | 63.66 | 0.21 | 63.46 | 96.07 | 44.17 | 2.85 | 41.31 | 65.10  |
| Niger     | NER | 2010 | AFR | LIC  | 63.04 | 1.98 | 61.06 | 73.07 | 58.49 | 3.78 | 54.71 | 89.59  |
| Niger     | NER | 2011 | AFR | LIC  | 66.68 | 2.62 | 64.06 | 76.79 | 64.90 | 4.20 | 60.71 | 94.76  |
| Niger     | NER | 2012 | AFR | LIC  | 71.14 | 3.44 | 67.71 | 82.46 | 72.80 | 4.71 | 68.09 | 100.57 |
| Niger     | NER | 2013 | AFR | LIC  | 70.96 | 2.57 | 68.39 | 84.33 | 67.72 | 4.38 | 63.34 | 92.62  |
| Niger     | NER | 2014 | AFR | LIC  | 65.62 | 1.88 | 63.75 | 78.63 | 59.58 | 3.85 | 55.73 | 87.42  |
| Niger     | NER | 2015 | AFR | LIC  | 64.30 | 2.52 | 61.78 | 73.09 | 62.58 | 4.05 | 58.54 | 94.75  |
| Niger     | NER | 2016 | AFR | LIC  | 61.81 | 2.37 | 59.44 | 69.44 | 59.82 | 3.87 | 55.95 | 94.14  |
| Niger     | NER | 2017 | AFR | LIC  | 63.11 | 2.00 | 61.11 | 73.08 | 58.67 | 3.79 | 54.88 | 89.81  |
| Niger     | NER | 2018 | AFR | LIC  | 60.19 | 0.58 | 59.61 | 74.85 | 47.94 | 3.10 | 44.85 | 75.23  |
| Niger     | NER | 2019 | AFR | LIC  | 68.59 | 2.08 | 66.51 | 82.41 | 63.17 | 4.08 | 59.08 | 88.83  |
| Nigeria   | NGA | 2010 | AFR | LMIC | 26.82 | 0.29 | 26.53 | 27.74 | 22.34 | 1.44 | 20.89 | 78.75  |
| Nigeria   | NGA | 2011 | AFR | LMIC | 26.67 | 0.25 | 26.43 | 27.74 | 21.89 | 1.41 | 20.48 | 77.48  |
| Nigeria   | NGA | 2012 | AFR | LMIC | 27.65 | 0.24 | 27.41 | 28.89 | 22.45 | 1.45 | 21.00 | 76.61  |
| Nigeria   | NGA | 2013 | AFR | LMIC | 27.46 | 0.25 | 27.21 | 28.89 | 22.01 | 1.42 | 20.59 | 75.65  |
| Nigeria   | NGA | 2014 | AFR | LMIC | 23.69 | 0.17 | 23.52 | 25.41 | 17.95 | 1.16 | 16.79 | 71.39  |
| Nigeria   | NGA | 2015 | AFR | LMIC | 23.61 | 0.15 | 23.46 | 25.40 | 17.70 | 1.14 | 16.56 | 70.58  |
| Nigeria   | NGA | 2016 | AFR | LMIC | 25.61 | 0.14 | 25.47 | 27.72 | 18.92 | 1.22 | 17.69 | 69.46  |
| Nigeria   | NGA | 2017 | AFR | LMIC | 25.69 | 0.15 | 25.54 | 27.72 | 19.12 | 1.24 | 17.89 | 70.04  |
| Nigeria   | NGA | 2018 | AFR | LMIC | 25.92 | 0.20 | 25.72 | 27.73 | 19.87 | 1.28 | 18.59 | 72.26  |
| Nigeria   | NGA | 2019 | AFR | LMIC | 29.23 | 0.25 | 28.98 | 31.21 | 22.62 | 1.46 | 21.15 | 73.00  |
| Nicaragua | NIC | 2010 | AMR | LMIC | 86.95 | 0.97 | 85.98 | 99.27 | 68.58 | 4.43 | 64.15 | 74.61  |
| Nicaragua | NIC | 2011 | AMR | LMIC | 87.72 | 0.81 | 86.91 | 99.29 | 70.09 | 4.53 | 65.56 | 75.44  |
| Nicaragua | NIC | 2012 | AMR | LMIC | 86.79 | 0.84 | 85.95 | 99.27 | 67.80 | 4.38 | 63.42 | 73.79  |
| Nicaragua | NIC | 2013 | AMR | LMIC | 82.87 | 0.26 | 82.61 | 99.15 | 58.55 | 3.78 | 54.77 | 66.30  |
| Nicaragua | NIC | 2014 | AMR | LMIC | 82.42 | 0.25 | 82.17 | 99.15 | 57.99 | 3.75 | 54.24 | 66.01  |
| Nicaragua | NIC | 2015 | AMR | LMIC | 80.65 | 0.24 | 80.41 | 99.12 | 56.12 | 3.63 | 52.50 | 65.29  |
| Nicaragua | NIC | 2016 | AMR | LMIC | 79.88 | 0.25 | 79.63 | 99.11 | 55.45 | 3.58 | 51.87 | 65.14  |
| Nicaragua | NIC | 2017 | AMR | LMIC | 77.91 | 0.31 | 77.59 | 99.08 | 54.00 | 3.49 | 50.51 | 65.09  |
| Nicaragua | NIC | 2018 | AMR | LMIC | 76.66 | 0.39 | 76.27 | 99.07 | 53.22 | 3.44 | 49.78 | 65.27  |
| Nicaragua | NIC | 2019 | AMR | LMIC | 77.08 | 0.36 | 76.72 | 99.08 | 53.47 | 3.46 | 50.02 | 65.19  |
| Nepal     | NPL | 2010 | SEA | LMIC | 47.34 | 0.78 | 46.56 | 75.86 | 40.65 | 2.63 | 38.02 | 81.66  |
| Nepal     | NPL | 2011 | SEA | LMIC | 48.21 | 0.60 | 47.62 | 77.86 | 40.59 | 2.62 | 37.97 | 79.74  |
| Nepal     | NPL | 2012 | SEA | LMIC | 50.99 | 1.23 | 49.76 | 81.91 | 44.91 | 2.90 | 42.01 | 84.42  |
| Nepal     | NPL | 2013 | SEA | LMIC | 49.29 | 0.58 | 48.70 | 79.87 | 41.36 | 2.67 | 38.69 | 79.43  |

|                                                              |     |      |     |      |       |      |       |       |       |      |       |        |
|--------------------------------------------------------------|-----|------|-----|------|-------|------|-------|-------|-------|------|-------|--------|
| Nepal                                                        | NPL | 2014 | SEA | LMIC | 52.84 | 0.47 | 52.37 | 87.96 | 42.50 | 2.75 | 39.75 | 75.91  |
| Nepal                                                        | NPL | 2015 | SEA | LMIC | 50.82 | 0.44 | 50.38 | 83.90 | 41.16 | 2.66 | 38.50 | 76.43  |
| Nepal                                                        | NPL | 2016 | SEA | LMIC | 48.28 | 0.44 | 47.84 | 79.85 | 38.62 | 2.50 | 36.12 | 75.52  |
| Nepal                                                        | NPL | 2017 | SEA | LMIC | 50.03 | 0.46 | 49.56 | 81.88 | 41.09 | 2.66 | 38.43 | 77.54  |
| Nepal                                                        | NPL | 2018 | SEA | LMIC | 50.20 | 0.51 | 49.69 | 83.89 | 39.83 | 2.57 | 37.25 | 74.97  |
| Nepal                                                        | NPL | 2019 | SEA | LMIC | 50.75 | 0.44 | 50.30 | 83.90 | 40.99 | 2.65 | 38.34 | 76.21  |
| Pakistan                                                     | PAK | 2010 | EMR | LMIC | 61.95 | 1.97 | 59.98 | 50.79 | 57.61 | 3.72 | 53.89 | 89.83  |
| Pakistan                                                     | PAK | 2011 | EMR | LMIC | 63.04 | 3.40 | 59.64 | 49.41 | 66.40 | 4.29 | 62.11 | 104.14 |
| Pakistan                                                     | PAK | 2012 | EMR | LMIC | 62.96 | 3.31 | 59.65 | 49.41 | 65.88 | 4.26 | 61.62 | 103.30 |
| Pakistan                                                     | PAK | 2013 | EMR | LMIC | 63.37 | 1.82 | 61.56 | 53.65 | 57.60 | 3.72 | 53.87 | 87.52  |
| Pakistan                                                     | PAK | 2014 | EMR | LMIC | 69.21 | 2.79 | 66.42 | 58.06 | 67.82 | 4.38 | 63.44 | 95.51  |
| Pakistan                                                     | PAK | 2015 | EMR | LMIC | 70.23 | 2.26 | 67.97 | 61.03 | 65.49 | 4.23 | 61.25 | 90.11  |
| Pakistan                                                     | PAK | 2016 | EMR | LMIC | 78.83 | 4.29 | 74.54 | 68.74 | 83.31 | 5.38 | 77.92 | 104.54 |
| Pakistan                                                     | PAK | 2017 | EMR | LMIC | 74.31 | 2.12 | 72.19 | 68.68 | 66.91 | 4.32 | 62.58 | 86.69  |
| Pakistan                                                     | PAK | 2018 | EMR | LMIC | 73.50 | 2.10 | 71.40 | 67.13 | 66.52 | 4.30 | 62.22 | 87.15  |
| Pakistan                                                     | PAK | 2019 | EMR | LMIC | 68.17 | 2.30 | 65.87 | 58.04 | 64.10 | 4.14 | 59.96 | 91.02  |
| Peru                                                         | PER | 2010 | AMR | UMIC | 84.37 | 0.36 | 84.01 | 92.11 | 60.89 | 3.94 | 56.95 | 67.79  |
| Peru                                                         | PER | 2011 | AMR | UMIC | 85.04 | 0.42 | 84.62 | 92.13 | 62.25 | 4.02 | 58.23 | 68.81  |
| Peru                                                         | PER | 2012 | AMR | UMIC | 78.48 | 0.29 | 78.19 | 92.02 | 54.39 | 3.52 | 50.87 | 65.06  |
| Peru                                                         | PER | 2013 | AMR | UMIC | 77.54 | 0.33 | 77.21 | 92.01 | 53.76 | 3.48 | 50.29 | 65.13  |
| Peru                                                         | PER | 2014 | AMR | UMIC | 81.55 | 0.24 | 81.31 | 92.06 | 57.00 | 3.68 | 53.32 | 65.57  |
| Peru                                                         | PER | 2015 | AMR | UMIC | 78.47 | 0.29 | 78.18 | 92.02 | 54.38 | 3.52 | 50.87 | 65.06  |
| Peru                                                         | PER | 2016 | AMR | UMIC | 80.23 | 0.25 | 79.99 | 92.04 | 55.75 | 3.60 | 52.15 | 65.20  |
| Peru                                                         | PER | 2017 | AMR | UMIC | 78.17 | 0.30 | 77.87 | 92.02 | 54.18 | 3.50 | 50.67 | 65.07  |
| Peru                                                         | PER | 2018 | AMR | UMIC | 75.45 | 0.91 | 74.55 | 99.16 | 52.57 | 3.40 | 49.17 | 65.96  |
| Peru                                                         | PER | 2019 | AMR | UMIC | 74.55 | 1.10 | 73.45 | 96.74 | 52.33 | 3.38 | 48.95 | 66.65  |
| Philippines                                                  | PHL | 2010 | WPR | LMIC | 35.77 | 0.33 | 35.44 | 32.89 | 27.84 | 1.80 | 26.04 | 73.48  |
| Philippines                                                  | PHL | 2011 | WPR | LMIC | 41.29 | 0.45 | 40.84 | 40.43 | 32.54 | 2.10 | 30.43 | 74.52  |
| Philippines                                                  | PHL | 2012 | WPR | LMIC | 45.05 | 0.41 | 44.64 | 45.19 | 36.12 | 2.33 | 33.78 | 75.67  |
| Philippines                                                  | PHL | 2013 | WPR | LMIC | 47.33 | 0.42 | 46.91 | 48.45 | 38.06 | 2.46 | 35.60 | 75.89  |
| Philippines                                                  | PHL | 2014 | WPR | LMIC | 48.38 | 0.43 | 47.94 | 50.10 | 38.83 | 2.51 | 36.32 | 75.75  |
| Philippines                                                  | PHL | 2015 | WPR | LMIC | 54.06 | 0.47 | 53.58 | 58.64 | 43.66 | 2.82 | 40.84 | 76.21  |
| Philippines                                                  | PHL | 2016 | WPR | LMIC | 64.62 | 0.63 | 63.99 | 75.05 | 53.36 | 3.45 | 49.91 | 78.01  |
| Philippines                                                  | PHL | 2017 | WPR | LMIC | 60.34 | 0.64 | 59.70 | 67.61 | 50.26 | 3.25 | 47.01 | 78.75  |
| Philippines                                                  | PHL | 2018 | WPR | LMIC | 70.40 | 0.75 | 69.65 | 84.70 | 58.64 | 3.79 | 54.85 | 78.76  |
| Philippines                                                  | PHL | 2019 | WPR | LMIC | 76.13 | 0.88 | 75.26 | 94.71 | 63.80 | 4.12 | 59.67 | 79.29  |
| Papua New Guinea                                             | PNG | 2010 | WPR | LMIC | 50.00 | 0.56 | 49.44 | 28.00 | 39.46 | 2.55 | 36.91 | 74.65  |
| Papua New Guinea                                             | PNG | 2011 | WPR | LMIC | 49.96 | 0.52 | 49.43 | 28.00 | 39.24 | 2.54 | 36.70 | 74.24  |
| Papua New Guinea                                             | PNG | 2012 | WPR | LMIC | 67.05 | 0.55 | 66.50 | 52.98 | 51.63 | 3.34 | 48.29 | 72.62  |
| Papua New Guinea                                             | PNG | 2013 | WPR | LMIC | 72.17 | 0.52 | 71.65 | 62.52 | 54.75 | 3.54 | 51.22 | 71.47  |
| Papua New Guinea                                             | PNG | 2014 | WPR | LMIC | 84.30 | 0.75 | 83.55 | 81.90 | 68.88 | 4.45 | 64.43 | 77.11  |
| Papua New Guinea                                             | PNG | 2015 | WPR | LMIC | 80.77 | 0.58 | 80.19 | 79.56 | 61.22 | 3.96 | 57.26 | 71.40  |
| Papua New Guinea                                             | PNG | 2016 | WPR | LMIC | 85.37 | 0.76 | 84.61 | 84.22 | 69.67 | 4.50 | 65.17 | 77.02  |
| Papua New Guinea                                             | PNG | 2017 | WPR | LMIC | 79.27 | 0.70 | 78.57 | 72.96 | 63.78 | 4.12 | 59.66 | 75.93  |
| Papua New Guinea                                             | PNG | 2018 | WPR | LMIC | 81.41 | 0.82 | 80.59 | 79.58 | 63.77 | 4.12 | 59.65 | 74.02  |
| Papua New Guinea                                             | PNG | 2019 | WPR | LMIC | 85.52 | 0.74 | 84.78 | 88.92 | 66.16 | 4.28 | 61.88 | 72.99  |
| Papua New Guinea<br>Democratic People's<br>Republic of Korea | PRK | 2010 | SEA | LIC  | 74.27 | 0.66 | 73.61 | 54.26 | 60.59 | 3.92 | 56.68 | 76.99  |

|                                       |     |      |     |      |       |      |       |       |       |      |       |       |
|---------------------------------------|-----|------|-----|------|-------|------|-------|-------|-------|------|-------|-------|
| Democratic People's Republic of Korea | PRK | 2011 | SEA | LIC  | 79.79 | 0.71 | 79.08 | 64.10 | 65.05 | 4.20 | 60.84 | 76.93 |
| Democratic People's Republic of Korea | PRK | 2012 | SEA | LIC  | 80.61 | 0.93 | 79.68 | 64.12 | 67.55 | 4.37 | 63.18 | 79.29 |
| Democratic People's Republic of Korea | PRK | 2013 | SEA | LIC  | 85.62 | 1.36 | 84.26 | 72.68 | 73.36 | 4.74 | 68.62 | 81.44 |
| Democratic People's Republic of Korea | PRK | 2014 | SEA | LIC  | 88.75 | 0.79 | 87.95 | 81.80 | 72.53 | 4.69 | 67.84 | 77.13 |
| Democratic People's Republic of Korea | PRK | 2015 | SEA | LIC  | 96.71 | 0.90 | 95.82 | 99.31 | 79.42 | 5.13 | 74.29 | 77.53 |
| Democratic People's Republic of Korea | PRK | 2016 | SEA | LIC  | 96.37 | 0.85 | 95.51 | 99.30 | 78.47 | 5.07 | 73.40 | 76.85 |
| Democratic People's Republic of Korea | PRK | 2017 | SEA | LIC  | 85.14 | 0.75 | 84.40 | 74.87 | 69.09 | 4.47 | 64.62 | 76.56 |
| Democratic People's Republic of Korea | PRK | 2018 | SEA | LIC  | 76.31 | 0.67 | 75.64 | 58.08 | 61.93 | 4.00 | 57.93 | 76.59 |
| Democratic People's Republic of Korea | PRK | 2019 | SEA | LIC  | 81.53 | 0.85 | 80.68 | 66.19 | 67.81 | 4.38 | 63.42 | 78.61 |
| Paraguay                              | PRY | 2010 | AMR | UMIC | 93.01 | 0.54 | 92.48 | 98.37 | 68.99 | 4.46 | 64.53 | 69.78 |
| Paraguay                              | PRY | 2011 | AMR | UMIC | 90.57 | 0.31 | 90.27 | 98.31 | 64.30 | 4.16 | 60.14 | 66.62 |
| Paraguay                              | PRY | 2012 | AMR | UMIC | 90.87 | 0.32 | 90.55 | 98.32 | 64.74 | 4.18 | 60.55 | 66.87 |
| Paraguay                              | PRY | 2013 | AMR | UMIC | 91.65 | 0.38 | 91.27 | 98.34 | 66.03 | 4.27 | 61.76 | 67.67 |
| Paraguay                              | PRY | 2014 | AMR | UMIC | 85.84 | 0.30 | 85.54 | 98.25 | 59.50 | 3.85 | 55.66 | 65.06 |
| Paraguay                              | PRY | 2015 | AMR | UMIC | 89.14 | 0.27 | 88.88 | 98.29 | 62.49 | 4.04 | 58.45 | 65.76 |
| Paraguay                              | PRY | 2016 | AMR | UMIC | 87.92 | 0.26 | 87.66 | 98.27 | 61.23 | 3.96 | 57.28 | 65.34 |
| Paraguay                              | PRY | 2017 | AMR | UMIC | 87.47 | 0.26 | 87.20 | 98.27 | 60.82 | 3.93 | 56.89 | 65.23 |
| Paraguay                              | PRY | 2018 | AMR | UMIC | 87.24 | 0.27 | 86.98 | 98.26 | 60.62 | 3.92 | 56.70 | 65.19 |
| Paraguay                              | PRY | 2019 | AMR | UMIC | 87.04 | 0.27 | 86.77 | 98.26 | 60.45 | 3.91 | 56.54 | 65.16 |
| Russian Federation                    | RUS | 2010 | EUR | UMIC | 90.91 | 0.75 | 90.16 | 98.68 | 62.11 | 4.01 | 58.10 | 64.44 |
| Russian Federation                    | RUS | 2011 | EUR | UMIC | 88.18 | 0.68 | 87.50 | 88.65 | 59.97 | 3.88 | 56.09 | 64.11 |
| Russian Federation                    | RUS | 2012 | EUR | UMIC | 87.27 | 0.52 | 86.76 | 85.44 | 57.92 | 3.74 | 54.18 | 62.45 |
| Russian Federation                    | RUS | 2013 | EUR | UMIC | 90.91 | 0.48 | 90.43 | 98.61 | 59.44 | 3.84 | 55.60 | 61.49 |
| Russian Federation                    | RUS | 2014 | EUR | UMIC | 90.91 | 0.46 | 90.45 | 98.59 | 58.77 | 3.80 | 54.97 | 60.78 |
| Russian Federation                    | RUS | 2015 | EUR | UMIC | 90.91 | 0.56 | 90.35 | 98.64 | 60.54 | 3.91 | 56.62 | 62.67 |
| Russian Federation                    | RUS | 2016 | EUR | UMIC | 90.91 | 0.62 | 90.29 | 98.66 | 61.17 | 3.95 | 57.22 | 63.37 |
| Russian Federation                    | RUS | 2017 | EUR | UMIC | 90.00 | 0.49 | 89.51 | 95.20 | 59.04 | 3.82 | 55.22 | 61.69 |
| Russian Federation                    | RUS | 2018 | EUR | UMIC | 90.00 | 0.47 | 89.53 | 95.19 | 58.70 | 3.79 | 54.91 | 61.33 |
| Russian Federation                    | RUS | 2019 | EUR | UMIC | 90.91 | 0.46 | 90.45 | 98.59 | 58.74 | 3.80 | 54.94 | 60.74 |
| Rwanda                                | RWA | 2010 | AFR | LIC  | 88.84 | 0.81 | 88.03 | 96.21 | 72.78 | 4.70 | 68.08 | 77.33 |
| Rwanda                                | RWA | 2011 | AFR | LIC  | 86.94 | 0.96 | 85.98 | 96.17 | 68.54 | 4.43 | 64.11 | 74.56 |
| Rwanda                                | RWA | 2012 | AFR | LIC  | 89.41 | 0.96 | 88.45 | 96.22 | 74.51 | 4.82 | 69.69 | 78.79 |
| Rwanda                                | RWA | 2013 | AFR | LIC  | 86.73 | 0.81 | 85.92 | 96.16 | 67.54 | 4.37 | 63.18 | 73.53 |
| Rwanda                                | RWA | 2014 | AFR | LIC  | 84.53 | 0.37 | 84.16 | 96.09 | 61.18 | 3.95 | 57.23 | 68.00 |
| Rwanda                                | RWA | 2015 | AFR | LIC  | 84.27 | 0.35 | 83.92 | 96.08 | 60.70 | 3.92 | 56.78 | 67.66 |
| Rwanda                                | RWA | 2016 | AFR | LIC  | 83.49 | 0.29 | 83.20 | 96.06 | 59.42 | 3.84 | 55.58 | 66.81 |
| Rwanda                                | RWA | 2017 | AFR | LIC  | 84.12 | 0.34 | 83.78 | 96.08 | 60.44 | 3.91 | 56.53 | 67.47 |
| Rwanda                                | RWA | 2018 | AFR | LIC  | 85.20 | 0.44 | 84.75 | 96.10 | 62.60 | 4.05 | 58.56 | 69.09 |
| Rwanda                                | RWA | 2019 | AFR | LIC  | 84.66 | 0.38 | 84.28 | 96.09 | 61.44 | 3.97 | 57.47 | 68.19 |
| Sudan                                 | SDN | 2010 | EMR | LIC  | 56.23 | 0.80 | 55.42 | 49.81 | 47.84 | 3.09 | 44.75 | 80.75 |
| Sudan                                 | SDN | 2011 | EMR | LIC  | 56.45 | 0.57 | 55.88 | 52.83 | 44.23 | 2.86 | 41.37 | 74.05 |
| Sudan                                 | SDN | 2012 | EMR | LIC  | 56.31 | 0.87 | 55.44 | 49.81 | 48.19 | 3.11 | 45.07 | 81.31 |
| Sudan                                 | SDN | 2013 | EMR | LIC  | 57.38 | 0.50 | 56.88 | 52.84 | 46.37 | 3.00 | 43.38 | 76.26 |
| Sudan                                 | SDN | 2014 | EMR | LIC  | 59.17 | 0.55 | 58.62 | 55.94 | 47.23 | 3.05 | 44.18 | 75.37 |
| Sudan                                 | SDN | 2015 | EMR | LIC  | 61.12 | 0.56 | 60.56 | 57.53 | 50.15 | 3.24 | 46.90 | 77.46 |
| Sudan                                 | SDN | 2016 | EMR | LIC  | 69.31 | 0.62 | 68.69 | 70.66 | 55.69 | 3.60 | 52.09 | 75.83 |
| Sudan                                 | SDN | 2017 | EMR | LIC  | 70.53 | 0.69 | 69.83 | 74.07 | 55.13 | 3.56 | 51.57 | 73.85 |

|                 |     |      |     |      |       |      |       |       |       |      |       |       |
|-----------------|-----|------|-----|------|-------|------|-------|-------|-------|------|-------|-------|
| Sudan           | SDN | 2018 | EMR | LIC  | 75.99 | 1.94 | 74.05 | 77.62 | 67.22 | 4.34 | 62.87 | 84.91 |
| Sudan           | SDN | 2019 | EMR | LIC  | 76.02 | 0.67 | 75.35 | 81.11 | 61.25 | 3.96 | 57.29 | 76.03 |
| Senegal         | SEN | 2010 | AFR | LMIC | 73.92 | 0.87 | 73.05 | 76.17 | 62.01 | 4.01 | 58.00 | 79.39 |
| Senegal         | SEN | 2011 | AFR | LMIC | 73.28 | 1.23 | 72.05 | 73.94 | 62.99 | 4.07 | 58.92 | 81.77 |
| Senegal         | SEN | 2012 | AFR | LMIC | 79.88 | 1.17 | 78.71 | 87.85 | 68.07 | 4.40 | 63.67 | 80.89 |
| Senegal         | SEN | 2013 | AFR | LMIC | 83.71 | 0.86 | 82.85 | 97.76 | 69.48 | 4.49 | 64.99 | 78.44 |
| Senegal         | SEN | 2014 | AFR | LMIC | 83.65 | 0.84 | 82.81 | 97.76 | 69.29 | 4.48 | 64.81 | 78.26 |
| Senegal         | SEN | 2015 | AFR | LMIC | 82.76 | 0.91 | 81.85 | 95.23 | 69.10 | 4.47 | 64.63 | 78.96 |
| Senegal         | SEN | 2016 | AFR | LMIC | 79.53 | 0.94 | 78.59 | 87.84 | 66.73 | 4.31 | 62.42 | 79.42 |
| Senegal         | SEN | 2017 | AFR | LMIC | 80.88 | 1.09 | 79.79 | 90.28 | 68.54 | 4.43 | 64.11 | 80.35 |
| Senegal         | SEN | 2018 | AFR | LMIC | 78.40 | 0.69 | 77.71 | 87.81 | 63.42 | 4.10 | 59.32 | 76.34 |
| Senegal         | SEN | 2019 | AFR | LMIC | 78.04 | 0.77 | 77.27 | 85.43 | 64.57 | 4.17 | 60.39 | 78.16 |
| Solomon Islands | SLB | 2010 | WPR | LMIC | 83.84 | 0.32 | 83.52 | 97.54 | 59.96 | 3.88 | 56.09 | 67.15 |
| Solomon Islands | SLB | 2011 | WPR | LMIC | 81.34 | 0.24 | 81.10 | 97.49 | 56.79 | 3.67 | 53.12 | 65.50 |
| Solomon Islands | SLB | 2012 | WPR | LMIC | 77.19 | 0.35 | 76.84 | 97.44 | 53.54 | 3.46 | 50.08 | 65.18 |
| Solomon Islands | SLB | 2013 | WPR | LMIC | 78.80 | 0.28 | 78.52 | 97.46 | 54.62 | 3.53 | 51.09 | 65.06 |
| Solomon Islands | SLB | 2014 | WPR | LMIC | 81.83 | 0.24 | 81.59 | 97.50 | 57.31 | 3.70 | 53.60 | 65.70 |
| Solomon Islands | SLB | 2015 | WPR | LMIC | 82.87 | 0.26 | 82.60 | 97.52 | 58.55 | 3.78 | 54.76 | 66.30 |
| Solomon Islands | SLB | 2016 | WPR | LMIC | 77.50 | 0.33 | 77.16 | 97.45 | 53.73 | 3.47 | 50.26 | 65.14 |
| Solomon Islands | SLB | 2017 | WPR | LMIC | 79.36 | 0.26 | 79.10 | 97.47 | 55.04 | 3.56 | 51.48 | 65.08 |
| Solomon Islands | SLB | 2018 | WPR | LMIC | 79.30 | 0.26 | 79.04 | 97.47 | 54.99 | 3.55 | 51.44 | 65.08 |
| Solomon Islands | SLB | 2019 | WPR | LMIC | 78.40 | 0.29 | 78.11 | 97.46 | 54.33 | 3.51 | 50.82 | 65.06 |
| Sierra Leone    | SLE | 2010 | AFR | LIC  | 66.18 | 0.26 | 65.92 | 66.82 | 47.48 | 3.07 | 44.41 | 67.38 |
| Sierra Leone    | SLE | 2011 | AFR | LIC  | 64.09 | 0.25 | 63.84 | 62.88 | 46.00 | 2.97 | 43.02 | 67.39 |
| Sierra Leone    | SLE | 2012 | AFR | LIC  | 65.35 | 0.27 | 65.08 | 64.84 | 47.13 | 3.05 | 44.08 | 67.73 |
| Sierra Leone    | SLE | 2013 | AFR | LIC  | 58.65 | 0.22 | 58.43 | 53.54 | 41.92 | 2.71 | 39.21 | 67.10 |
| Sierra Leone    | SLE | 2014 | AFR | LIC  | 58.70 | 0.18 | 58.52 | 55.34 | 41.28 | 2.67 | 38.61 | 65.98 |
| Sierra Leone    | SLE | 2015 | AFR | LIC  | 55.83 | 0.18 | 55.66 | 50.00 | 39.39 | 2.55 | 36.84 | 66.19 |
| Sierra Leone    | SLE | 2016 | AFR | LIC  | 66.14 | 0.26 | 65.88 | 66.82 | 47.41 | 3.06 | 44.35 | 67.32 |
| Sierra Leone    | SLE | 2017 | AFR | LIC  | 74.90 | 0.32 | 74.58 | 83.66 | 54.08 | 3.50 | 50.58 | 67.82 |
| Sierra Leone    | SLE | 2018 | AFR | LIC  | 78.27 | 0.28 | 77.99 | 92.72 | 55.70 | 3.60 | 52.10 | 66.80 |
| Sierra Leone    | SLE | 2019 | AFR | LIC  | 81.28 | 0.35 | 80.93 | 97.44 | 58.73 | 3.80 | 54.94 | 67.88 |
| El Salvador     | SLV | 2010 | AMR | LMIC | 80.92 | 0.24 | 80.68 | 99.35 | 56.37 | 3.64 | 52.73 | 65.36 |
| El Salvador     | SLV | 2011 | AMR | LMIC | 80.66 | 0.24 | 80.42 | 99.34 | 56.13 | 3.63 | 52.50 | 65.29 |
| El Salvador     | SLV | 2012 | AMR | LMIC | 80.11 | 0.25 | 79.86 | 99.33 | 55.64 | 3.60 | 52.05 | 65.17 |
| El Salvador     | SLV | 2013 | AMR | LMIC | 80.77 | 0.24 | 80.53 | 99.35 | 56.23 | 3.63 | 52.60 | 65.32 |
| El Salvador     | SLV | 2014 | AMR | LMIC | 80.95 | 0.24 | 80.71 | 99.35 | 56.40 | 3.65 | 52.75 | 65.37 |
| El Salvador     | SLV | 2015 | AMR | LMIC | 75.44 | 0.50 | 74.94 | 99.28 | 52.55 | 3.40 | 49.15 | 65.58 |
| El Salvador     | SLV | 2016 | AMR | LMIC | 83.40 | 0.29 | 83.11 | 99.39 | 59.29 | 3.83 | 55.46 | 66.73 |
| El Salvador     | SLV | 2017 | AMR | LMIC | 84.13 | 0.34 | 83.79 | 99.41 | 60.45 | 3.91 | 56.54 | 67.48 |
| El Salvador     | SLV | 2018 | AMR | LMIC | 77.25 | 0.35 | 76.91 | 99.30 | 53.58 | 3.46 | 50.12 | 65.17 |
| El Salvador     | SLV | 2019 | AMR | LMIC | 77.23 | 0.35 | 76.88 | 99.30 | 53.56 | 3.46 | 50.10 | 65.17 |
| Somalia         | SOM | 2010 | EMR | LIC  | 31.22 | 0.22 | 31.00 | 59.27 | 23.64 | 1.53 | 22.11 | 71.32 |
| Somalia         | SOM | 2011 | EMR | LIC  | 35.39 | 0.22 | 35.17 | 68.00 | 26.47 | 1.71 | 24.76 | 70.40 |
| Somalia         | SOM | 2012 | EMR | LIC  | 35.70 | 0.30 | 35.40 | 68.02 | 27.53 | 1.78 | 25.75 | 72.74 |
| Somalia         | SOM | 2013 | EMR | LIC  | 37.86 | 0.32 | 37.54 | 72.41 | 29.19 | 1.89 | 27.30 | 72.71 |
| Somalia         | SOM | 2014 | EMR | LIC  | 38.49 | 0.34 | 38.14 | 72.42 | 30.90 | 2.00 | 28.90 | 75.78 |
| Somalia         | SOM | 2015 | EMR | LIC  | 40.31 | 0.43 | 39.89 | 76.83 | 31.91 | 2.06 | 29.85 | 74.83 |

|                       |     |      |     |      |       |      |       |       |       |      |       |       |
|-----------------------|-----|------|-----|------|-------|------|-------|-------|-------|------|-------|-------|
| Somalia               | SOM | 2016 | EMR | LIC  | 40.55 | 0.38 | 40.17 | 76.83 | 32.37 | 2.09 | 30.28 | 75.38 |
| Somalia               | SOM | 2017 | EMR | LIC  | 46.49 | 0.38 | 46.11 | 90.13 | 35.77 | 2.31 | 33.46 | 72.55 |
| Somalia               | SOM | 2018 | EMR | LIC  | 47.08 | 0.57 | 46.50 | 87.95 | 39.59 | 2.56 | 37.03 | 79.64 |
| Somalia               | SOM | 2019 | EMR | LIC  | 46.42 | 0.41 | 46.01 | 87.93 | 37.63 | 2.43 | 35.19 | 76.49 |
| Serbia                | SRB | 2010 | EUR | UMIC | 79.09 | 1.14 | 77.95 | 99.31 | 55.50 | 3.59 | 51.91 | 66.60 |
| Serbia                | SRB | 2011 | EUR | UMIC | 79.09 | 0.44 | 78.65 | 99.25 | 52.12 | 3.37 | 48.75 | 61.99 |
| Serbia                | SRB | 2012 | EUR | UMIC | 79.09 | 0.43 | 78.67 | 99.24 | 51.81 | 3.35 | 48.46 | 61.60 |
| Serbia                | SRB | 2013 | EUR | UMIC | 79.09 | 0.53 | 78.56 | 99.27 | 53.12 | 3.43 | 49.69 | 63.24 |
| Serbia                | SRB | 2014 | EUR | UMIC | 79.09 | 0.47 | 78.62 | 99.26 | 52.47 | 3.39 | 49.07 | 62.42 |
| Serbia                | SRB | 2015 | EUR | UMIC | 79.09 | 0.75 | 78.34 | 99.30 | 54.50 | 3.52 | 50.98 | 65.07 |
| Serbia                | SRB | 2016 | EUR | UMIC | 79.09 | 0.84 | 78.25 | 99.30 | 54.81 | 3.54 | 51.26 | 65.51 |
| Serbia                | SRB | 2017 | EUR | UMIC | 79.09 | 0.65 | 78.44 | 99.29 | 53.99 | 3.49 | 50.50 | 64.38 |
| Serbia                | SRB | 2018 | EUR | UMIC | 79.09 | 0.64 | 78.45 | 99.29 | 53.96 | 3.49 | 50.47 | 64.33 |
| Serbia                | SRB | 2019 | EUR | UMIC | 79.09 | 0.56 | 78.53 | 99.28 | 53.46 | 3.46 | 50.01 | 63.68 |
| South Sudan           | SSD | 2011 | AFR | LIC  | 34.59 | 0.28 | 34.31 | 35.08 | 26.59 | 1.72 | 24.87 | 72.49 |
| South Sudan           | SSD | 2012 | AFR | LIC  | 40.07 | 0.35 | 39.72 | 43.27 | 31.06 | 2.01 | 29.05 | 73.15 |
| South Sudan           | SSD | 2013 | AFR | LIC  | 29.20 | 0.24 | 28.96 | 27.44 | 22.47 | 1.45 | 21.02 | 72.59 |
| South Sudan           | SSD | 2014 | AFR | LIC  | 37.83 | 0.30 | 37.52 | 39.93 | 29.07 | 1.88 | 27.19 | 72.45 |
| South Sudan           | SSD | 2015 | AFR | LIC  | 43.01 | 0.29 | 42.72 | 48.42 | 32.43 | 2.10 | 30.33 | 71.01 |
| South Sudan           | SSD | 2016 | AFR | LIC  | 47.52 | 0.37 | 47.15 | 55.58 | 36.38 | 2.35 | 34.03 | 72.19 |
| South Sudan           | SSD | 2017 | AFR | LIC  | 44.15 | 0.31 | 43.84 | 50.18 | 33.46 | 2.16 | 31.30 | 71.39 |
| South Sudan           | SSD | 2018 | AFR | LIC  | 67.50 | 1.93 | 65.57 | 85.00 | 60.82 | 3.93 | 56.89 | 86.76 |
| South Sudan           | SSD | 2019 | AFR | LIC  | 74.05 | 2.14 | 71.92 | 97.77 | 66.43 | 4.29 | 62.13 | 86.40 |
| Sao Tome and Principe | STP | 2010 | AFR | LMIC | 56.79 | 0.18 | 56.61 | 99.58 | 39.41 | 2.55 | 36.86 | 65.12 |
| Sao Tome and Principe | STP | 2011 | AFR | LMIC | 57.28 | 0.17 | 57.11 | 99.58 | 39.83 | 2.57 | 37.25 | 65.23 |
| Sao Tome and Principe | STP | 2012 | AFR | LMIC | 55.86 | 0.21 | 55.65 | 99.57 | 38.71 | 2.50 | 36.21 | 65.06 |
| Sao Tome and Principe | STP | 2013 | AFR | LMIC | 54.92 | 0.26 | 54.66 | 99.56 | 38.10 | 2.46 | 35.64 | 65.19 |
| Sao Tome and Principe | STP | 2014 | AFR | LMIC | 56.63 | 0.18 | 56.45 | 99.58 | 39.28 | 2.54 | 36.74 | 65.09 |
| Sao Tome and Principe | STP | 2015 | AFR | LMIC | 55.42 | 0.23 | 55.20 | 99.56 | 38.42 | 2.48 | 35.93 | 65.10 |
| Sao Tome and Principe | STP | 2016 | AFR | LMIC | 56.86 | 0.18 | 56.68 | 99.58 | 39.46 | 2.55 | 36.91 | 65.13 |
| Sao Tome and Principe | STP | 2017 | AFR | LMIC | 53.77 | 0.36 | 53.41 | 99.55 | 37.44 | 2.42 | 35.02 | 65.58 |
| Sao Tome and Principe | STP | 2018 | AFR | LMIC | 56.42 | 0.19 | 56.23 | 99.58 | 39.12 | 2.53 | 36.59 | 65.07 |
| Sao Tome and Principe | STP | 2019 | AFR | LMIC | 56.09 | 0.20 | 55.89 | 99.57 | 38.87 | 2.51 | 36.36 | 65.06 |
| Suriname              | SUR | 2010 | AMR | UMIC | 72.73 | 0.70 | 72.03 | 99.56 | 50.14 | 3.24 | 46.90 | 65.11 |
| Suriname              | SUR | 2011 | AMR | UMIC | 72.73 | 0.45 | 72.28 | 99.52 | 48.46 | 3.13 | 45.33 | 62.72 |
| Suriname              | SUR | 2012 | AMR | UMIC | 72.73 | 0.56 | 72.16 | 99.54 | 49.48 | 3.20 | 46.28 | 64.13 |
| Suriname              | SUR | 2013 | AMR | UMIC | 72.73 | 0.61 | 72.12 | 99.55 | 49.74 | 3.21 | 46.52 | 64.51 |
| Suriname              | SUR | 2014 | AMR | UMIC | 72.73 | 0.63 | 72.10 | 99.55 | 49.80 | 3.22 | 46.58 | 64.61 |
| Suriname              | SUR | 2015 | AMR | UMIC | 72.73 | 0.76 | 71.97 | 99.57 | 50.34 | 3.25 | 47.09 | 65.43 |
| Suriname              | SUR | 2016 | AMR | UMIC | 74.66 | 0.64 | 74.02 | 99.60 | 52.14 | 3.37 | 48.77 | 65.89 |
| Suriname              | SUR | 2017 | AMR | UMIC | 76.08 | 0.44 | 75.64 | 99.61 | 52.89 | 3.42 | 49.47 | 65.40 |
| Suriname              | SUR | 2018 | AMR | UMIC | 72.73 | 0.96 | 71.77 | 99.58 | 50.87 | 3.29 | 47.58 | 66.30 |
| Suriname              | SUR | 2019 | AMR | UMIC | 72.73 | 0.53 | 72.20 | 99.54 | 49.25 | 3.18 | 46.06 | 63.80 |
| Eswatini              | SWZ | 2010 | AFR | LMIC | 64.91 | 0.54 | 64.37 | 78.52 | 50.07 | 3.24 | 46.83 | 72.75 |
| Eswatini              | SWZ | 2011 | AFR | LMIC | 64.50 | 0.44 | 64.07 | 78.51 | 48.61 | 3.14 | 45.46 | 70.97 |
| Eswatini              | SWZ | 2012 | AFR | LMIC | 60.92 | 0.18 | 60.73 | 78.45 | 42.50 | 2.75 | 39.75 | 65.45 |
| Eswatini              | SWZ | 2013 | AFR | LMIC | 65.18 | 0.69 | 64.48 | 78.53 | 51.25 | 3.31 | 47.94 | 74.35 |
| Eswatini              | SWZ | 2014 | AFR | LMIC | 63.83 | 0.33 | 63.51 | 78.49 | 46.81 | 3.03 | 43.78 | 68.94 |



|                      |     |      |     |      |        |       |       |       |       |      |       |       |
|----------------------|-----|------|-----|------|--------|-------|-------|-------|-------|------|-------|-------|
| Eswatini             | SWZ | 2015 | AFR | LMIC | 61.30  | 0.18  | 61.12 | 78.45 | 42.90 | 2.77 | 40.12 | 65.65 |
| Eswatini             | SWZ | 2016 | AFR | LMIC | 59.18  | 0.20  | 58.98 | 78.43 | 41.02 | 2.65 | 38.37 | 65.06 |
| Eswatini             | SWZ | 2017 | AFR | LMIC | 58.42  | 0.24  | 58.19 | 78.42 | 40.49 | 2.62 | 37.88 | 65.09 |
| Eswatini             | SWZ | 2018 | AFR | LMIC | 57.33  | 0.30  | 57.03 | 78.42 | 39.82 | 2.57 | 37.25 | 65.31 |
| Eswatini             | SWZ | 2019 | AFR | LMIC | 67.20  | 0.27  | 66.93 | 96.44 | 46.57 | 3.01 | 43.56 | 65.09 |
| Syrian Arab Republic | SYR | 2010 | EMR | LIC  | 81.91  | 0.24  | 81.67 | 97.61 | 57.39 | 3.71 | 53.68 | 65.73 |
| Syrian Arab Republic | SYR | 2011 | EMR | LIC  | 86.30  | 0.65  | 85.65 | 97.71 | 65.81 | 4.25 | 61.56 | 71.87 |
| Syrian Arab Republic | SYR | 2012 | EMR | LIC  | 86.47  | 0.70  | 85.77 | 97.72 | 66.45 | 4.30 | 62.16 | 72.47 |
| Syrian Arab Republic | SYR | 2013 | EMR | LIC  | 84.58  | 0.37  | 84.20 | 97.66 | 61.28 | 3.96 | 57.32 | 68.07 |
| Syrian Arab Republic | SYR | 2014 | EMR | LIC  | 99.97  | 12.51 | 87.46 | 97.70 | 64.11 | 4.14 | 59.97 | 68.57 |
| Syrian Arab Republic | SYR | 2015 | EMR | LIC  | 100.00 | 20.62 | 79.38 | 97.69 | 63.63 | 4.11 | 59.52 | 74.97 |
| Syrian Arab Republic | SYR | 2016 | EMR | LIC  | 97.49  | 5.84  | 91.65 | 97.68 | 62.89 | 4.07 | 58.83 | 64.19 |
| Syrian Arab Republic | SYR | 2017 | EMR | LIC  | 99.48  | 9.31  | 90.17 | 97.69 | 63.53 | 4.11 | 59.42 | 65.90 |
| Syrian Arab Republic | SYR | 2018 | EMR | LIC  | 86.89  | 0.92  | 85.97 | 97.74 | 68.28 | 4.41 | 63.87 | 74.29 |
| Syrian Arab Republic | SYR | 2019 | EMR | LIC  | 90.27  | 1.61  | 88.66 | 97.82 | 77.88 | 5.03 | 72.84 | 82.16 |
| Chad                 | TCD | 2010 | AFR | LIC  | 60.59  | 0.77  | 59.81 | 58.99 | 51.13 | 3.30 | 47.82 | 79.95 |
| Chad                 | TCD | 2011 | AFR | LIC  | 65.75  | 1.62  | 64.12 | 65.50 | 57.99 | 3.75 | 54.24 | 84.59 |
| Chad                 | TCD | 2012 | AFR | LIC  | 63.55  | 0.63  | 62.92 | 63.83 | 52.58 | 3.40 | 49.18 | 78.17 |
| Chad                 | TCD | 2013 | AFR | LIC  | 65.02  | 0.80  | 64.22 | 65.48 | 54.70 | 3.54 | 51.17 | 79.67 |
| Chad                 | TCD | 2014 | AFR | LIC  | 66.93  | 0.67  | 66.26 | 68.81 | 55.47 | 3.59 | 51.88 | 78.30 |
| Chad                 | TCD | 2015 | AFR | LIC  | 62.11  | 0.55  | 61.56 | 62.20 | 50.73 | 3.28 | 47.45 | 77.09 |
| Chad                 | TCD | 2016 | AFR | LIC  | 57.87  | 0.55  | 57.32 | 55.81 | 47.67 | 3.08 | 44.59 | 77.78 |
| Chad                 | TCD | 2017 | AFR | LIC  | 61.98  | 1.01  | 60.97 | 60.60 | 53.17 | 3.44 | 49.73 | 81.57 |
| Chad                 | TCD | 2018 | AFR | LIC  | 66.87  | 1.64  | 65.23 | 67.16 | 58.95 | 3.81 | 55.14 | 84.53 |
| Chad                 | TCD | 2019 | AFR | LIC  | 67.09  | 0.73  | 66.36 | 68.81 | 56.00 | 3.62 | 52.38 | 78.93 |
| Togo                 | TGO | 2010 | AFR | LIC  | 63.54  | 0.63  | 62.92 | 40.49 | 52.57 | 3.40 | 49.17 | 78.16 |
| Togo                 | TGO | 2011 | AFR | LIC  | 66.67  | 0.61  | 66.06 | 45.17 | 54.70 | 3.54 | 51.17 | 77.46 |
| Togo                 | TGO | 2012 | AFR | LIC  | 68.55  | 0.95  | 67.60 | 46.81 | 58.18 | 3.76 | 54.42 | 80.49 |
| Togo                 | TGO | 2013 | AFR | LIC  | 62.82  | 0.56  | 62.26 | 41.99 | 48.71 | 3.15 | 45.56 | 73.17 |
| Togo                 | TGO | 2014 | AFR | LIC  | 67.62  | 0.60  | 67.02 | 46.79 | 55.17 | 3.57 | 51.60 | 76.99 |
| Togo                 | TGO | 2015 | AFR | LIC  | 76.26  | 0.95  | 75.31 | 59.04 | 64.25 | 4.15 | 60.10 | 79.81 |
| Togo                 | TGO | 2016 | AFR | LIC  | 85.03  | 0.42  | 84.61 | 83.42 | 62.22 | 4.02 | 58.20 | 68.79 |
| Togo                 | TGO | 2017 | AFR | LIC  | 85.74  | 0.39  | 85.35 | 85.66 | 62.25 | 4.02 | 58.23 | 68.22 |
| Togo                 | TGO | 2018 | AFR | LIC  | 90.11  | 0.85  | 89.26 | 85.78 | 74.15 | 4.79 | 69.36 | 77.70 |
| Togo                 | TGO | 2019 | AFR | LIC  | 94.25  | 0.88  | 93.37 | 97.45 | 75.25 | 4.86 | 70.38 | 75.38 |
| Thailand             | THA | 2010 | SEA | UMIC | 59.23  | 0.42  | 58.80 | 37.63 | 44.88 | 2.90 | 41.98 | 71.38 |
| Thailand             | THA | 2011 | SEA | UMIC | 59.64  | 0.56  | 59.08 | 37.64 | 46.51 | 3.01 | 43.50 | 73.63 |
| Thailand             | THA | 2012 | SEA | UMIC | 56.37  | 0.52  | 55.85 | 33.09 | 43.87 | 2.84 | 41.03 | 73.47 |
| Thailand             | THA | 2013 | SEA | UMIC | 60.16  | 0.58  | 59.57 | 37.65 | 47.88 | 3.09 | 44.78 | 75.17 |
| Thailand             | THA | 2014 | SEA | UMIC | 66.40  | 0.99  | 65.41 | 44.26 | 56.66 | 3.66 | 53.00 | 81.02 |
| Thailand             | THA | 2015 | SEA | UMIC | 61.31  | 0.60  | 60.70 | 37.66 | 50.70 | 3.28 | 47.43 | 78.13 |
| Thailand             | THA | 2016 | SEA | UMIC | 73.04  | 2.09  | 70.95 | 53.36 | 65.63 | 4.24 | 61.39 | 86.53 |
| Thailand             | THA | 2017 | SEA | UMIC | 83.62  | 1.65  | 81.97 | 74.42 | 72.59 | 4.69 | 67.90 | 82.84 |
| Thailand             | THA | 2018 | SEA | UMIC | 89.56  | 1.03  | 88.53 | 88.96 | 75.02 | 4.85 | 70.17 | 79.26 |
| Thailand             | THA | 2019 | SEA | UMIC | 93.67  | 0.93  | 92.74 | 99.45 | 77.57 | 5.01 | 72.55 | 78.23 |
| Tajikistan           | TJK | 2010 | EUR | LIC  | 75.15  | 0.26  | 74.88 | 75.47 | 53.49 | 3.46 | 50.03 | 66.81 |
| Tajikistan           | TJK | 2011 | EUR | LIC  | 75.22  | 0.35  | 74.88 | 89.20 | 52.18 | 3.37 | 48.81 | 65.18 |
| Tajikistan           | TJK | 2012 | EUR | LIC  | 77.56  | 0.23  | 77.33 | 86.85 | 53.96 | 3.49 | 50.47 | 65.27 |

|             |     |      |     |      |       |      |       |       |       |      |       |       |
|-------------|-----|------|-----|------|-------|------|-------|-------|-------|------|-------|-------|
| Tajikistan  | TJK | 2013 | EUR | LIC  | 68.66 | 0.22 | 68.44 | 68.97 | 47.64 | 3.08 | 44.56 | 65.10 |
| Tajikistan  | TJK | 2014 | EUR | LIC  | 78.60 | 0.23 | 78.37 | 86.87 | 54.98 | 3.55 | 51.43 | 65.62 |
| Tajikistan  | TJK | 2015 | EUR | LIC  | 80.31 | 0.27 | 80.05 | 96.59 | 55.70 | 3.60 | 52.10 | 65.08 |
| Tajikistan  | TJK | 2016 | EUR | LIC  | 82.45 | 0.24 | 82.21 | 96.62 | 57.59 | 3.72 | 53.87 | 65.53 |
| Tajikistan  | TJK | 2017 | EUR | LIC  | 79.73 | 0.24 | 79.49 | 91.66 | 55.50 | 3.59 | 51.91 | 65.31 |
| Tajikistan  | TJK | 2018 | EUR | LIC  | 76.31 | 0.23 | 76.08 | 82.19 | 53.29 | 3.44 | 49.85 | 65.52 |
| Tajikistan  | TJK | 2019 | EUR | LIC  | 79.00 | 0.44 | 78.56 | 79.98 | 58.39 | 3.77 | 54.62 | 69.52 |
| Timor-Leste | TLS | 2010 | SEA | LMIC | 85.39 | 0.69 | 84.70 | 94.15 | 65.60 | 4.24 | 61.36 | 72.45 |
| Timor-Leste | TLS | 2011 | SEA | LMIC | 84.97 | 0.58 | 84.38 | 94.13 | 64.12 | 4.14 | 59.98 | 71.08 |
| Timor-Leste | TLS | 2012 | SEA | LMIC | 73.03 | 0.48 | 72.55 | 66.95 | 54.86 | 3.55 | 51.32 | 70.73 |
| Timor-Leste | TLS | 2013 | SEA | LMIC | 71.45 | 0.64 | 70.80 | 60.47 | 57.32 | 3.70 | 53.61 | 75.72 |
| Timor-Leste | TLS | 2014 | SEA | LMIC | 68.41 | 0.71 | 67.70 | 56.31 | 53.71 | 3.47 | 50.24 | 74.20 |
| Timor-Leste | TLS | 2015 | SEA | LMIC | 61.48 | 0.56 | 60.92 | 43.10 | 49.23 | 3.18 | 46.04 | 75.58 |
| Timor-Leste | TLS | 2016 | SEA | LMIC | 64.12 | 0.71 | 63.41 | 48.51 | 50.57 | 3.27 | 47.30 | 74.59 |
| Timor-Leste | TLS | 2017 | SEA | LMIC | 61.51 | 0.56 | 60.96 | 43.10 | 49.29 | 3.19 | 46.11 | 75.64 |
| Timor-Leste | TLS | 2018 | SEA | LMIC | 65.08 | 0.63 | 64.46 | 50.40 | 50.82 | 3.28 | 47.53 | 73.74 |
| Timor-Leste | TLS | 2019 | SEA | LMIC | 69.45 | 0.61 | 68.84 | 56.33 | 56.00 | 3.62 | 52.38 | 76.10 |
| Tonga       | TON | 2010 | WPR | UMIC | 79.09 | 0.37 | 78.72 | 98.88 | 49.91 | 3.23 | 46.69 | 59.31 |
| Tonga       | TON | 2011 | WPR | UMIC | 79.09 | 0.32 | 78.77 | 98.81 | 46.93 | 3.03 | 43.89 | 55.72 |
| Tonga       | TON | 2012 | WPR | UMIC | 79.09 | 0.36 | 78.73 | 98.87 | 49.44 | 3.20 | 46.25 | 58.74 |
| Tonga       | TON | 2013 | WPR | UMIC | 79.09 | 0.36 | 78.73 | 98.87 | 49.32 | 3.19 | 46.13 | 58.59 |
| Tonga       | TON | 2014 | WPR | UMIC | 79.09 | 0.56 | 78.53 | 98.96 | 53.44 | 3.45 | 49.98 | 63.65 |
| Tonga       | TON | 2015 | WPR | UMIC | 79.09 | 1.19 | 77.90 | 99.00 | 55.55 | 3.59 | 51.96 | 66.70 |
| Tonga       | TON | 2016 | WPR | UMIC | 79.09 | 0.42 | 78.67 | 98.92 | 51.76 | 3.35 | 48.42 | 61.55 |
| Tonga       | TON | 2017 | WPR | UMIC | 79.09 | 0.49 | 78.60 | 98.94 | 52.73 | 3.41 | 49.33 | 62.75 |
| Tonga       | TON | 2018 | WPR | UMIC | 79.09 | 0.35 | 78.74 | 98.85 | 48.85 | 3.16 | 45.69 | 58.03 |
| Tonga       | TON | 2019 | WPR | UMIC | 79.09 | 0.33 | 78.76 | 98.83 | 47.68 | 3.08 | 44.60 | 56.63 |
| Tunisia     | TUN | 2010 | EMR | LMIC | 85.11 | 0.43 | 84.68 | 97.82 | 62.41 | 4.03 | 58.38 | 68.94 |
| Tunisia     | TUN | 2011 | EMR | LMIC | 86.10 | 0.60 | 85.50 | 97.85 | 65.11 | 4.21 | 60.90 | 71.23 |
| Tunisia     | TUN | 2012 | EMR | LMIC | 87.47 | 0.85 | 86.62 | 97.90 | 69.59 | 4.50 | 65.09 | 75.14 |
| Tunisia     | TUN | 2013 | EMR | LMIC | 87.34 | 0.88 | 86.46 | 97.90 | 69.33 | 4.48 | 64.85 | 75.01 |
| Tunisia     | TUN | 2014 | EMR | LMIC | 88.82 | 0.80 | 88.01 | 97.93 | 72.71 | 4.70 | 68.01 | 77.27 |
| Tunisia     | TUN | 2015 | EMR | LMIC | 86.83 | 0.87 | 85.96 | 97.88 | 67.98 | 4.39 | 63.58 | 73.97 |
| Tunisia     | TUN | 2016 | EMR | LMIC | 86.75 | 0.82 | 85.93 | 97.88 | 67.61 | 4.37 | 63.24 | 73.60 |
| Tunisia     | TUN | 2017 | EMR | LMIC | 86.73 | 0.81 | 85.92 | 97.88 | 67.55 | 4.37 | 63.19 | 73.54 |
| Tunisia     | TUN | 2018 | EMR | LMIC | 86.76 | 0.83 | 85.94 | 97.88 | 67.69 | 4.38 | 63.31 | 73.67 |
| Tunisia     | TUN | 2019 | EMR | LMIC | 86.79 | 0.84 | 85.95 | 97.88 | 67.81 | 4.38 | 63.43 | 73.80 |
| Turkey      | TUR | 2010 | EUR | UMIC | 85.96 | 0.29 | 85.67 | 98.97 | 59.59 | 3.85 | 55.74 | 65.06 |
| Turkey      | TUR | 2011 | EUR | UMIC | 85.91 | 0.29 | 85.62 | 98.97 | 59.55 | 3.85 | 55.70 | 65.06 |
| Turkey      | TUR | 2012 | EUR | UMIC | 83.50 | 0.41 | 83.08 | 98.94 | 57.95 | 3.75 | 54.21 | 65.25 |
| Turkey      | TUR | 2013 | EUR | UMIC | 81.41 | 0.65 | 80.76 | 98.92 | 56.81 | 3.67 | 53.14 | 65.80 |
| Turkey      | TUR | 2014 | EUR | UMIC | 79.09 | 1.12 | 77.97 | 98.90 | 55.47 | 3.59 | 51.88 | 66.55 |
| Turkey      | TUR | 2015 | EUR | UMIC | 81.54 | 0.63 | 80.91 | 98.92 | 56.88 | 3.68 | 53.20 | 65.76 |
| Turkey      | TUR | 2016 | EUR | UMIC | 81.48 | 0.64 | 80.84 | 98.93 | 56.85 | 3.67 | 53.17 | 65.78 |
| Turkey      | TUR | 2017 | EUR | UMIC | 83.15 | 0.44 | 82.71 | 98.94 | 57.75 | 3.73 | 54.02 | 65.31 |
| Turkey      | TUR | 2018 | EUR | UMIC | 83.53 | 0.41 | 83.12 | 98.95 | 57.98 | 3.75 | 54.23 | 65.24 |
| Turkey      | TUR | 2019 | EUR | UMIC | 83.36 | 0.42 | 82.93 | 98.94 | 57.87 | 3.74 | 54.13 | 65.27 |
| Tuvalu      | TUV | 2010 | WPR | UMIC | 79.09 | 0.44 | 78.65 | 99.57 | 52.08 | 3.37 | 48.71 | 61.94 |

|                                    |     |      |     |      |       |      |       |       |       |      |       |       |
|------------------------------------|-----|------|-----|------|-------|------|-------|-------|-------|------|-------|-------|
| Tuvalu                             | TUV | 2011 | WPR | UMIC | 82.87 | 0.46 | 82.41 | 99.68 | 57.59 | 3.72 | 53.87 | 65.37 |
| Tuvalu                             | TUV | 2012 | WPR | UMIC | 87.39 | 0.26 | 87.12 | 99.70 | 60.75 | 3.93 | 56.82 | 65.22 |
| Tuvalu                             | TUV | 2013 | WPR | UMIC | 85.02 | 0.33 | 84.69 | 99.74 | 58.92 | 3.81 | 55.11 | 65.07 |
| Tuvalu                             | TUV | 2014 | WPR | UMIC | 87.78 | 0.26 | 87.51 | 99.83 | 61.10 | 3.95 | 57.15 | 65.30 |
| Tuvalu                             | TUV | 2015 | WPR | UMIC | 89.65 | 0.27 | 89.38 | 99.76 | 63.08 | 4.08 | 59.00 | 66.01 |
| Tuvalu                             | TUV | 2016 | WPR | UMIC | 86.79 | 0.27 | 86.51 | 99.73 | 60.24 | 3.89 | 56.34 | 65.13 |
| Tuvalu                             | TUV | 2017 | WPR | UMIC | 86.33 | 0.28 | 86.05 | 99.72 | 59.88 | 3.87 | 56.01 | 65.08 |
| Tuvalu                             | TUV | 2018 | WPR | UMIC | 90.42 | 0.30 | 90.12 | 99.75 | 64.07 | 4.14 | 59.93 | 66.50 |
| Tuvalu                             | TUV | 2019 | WPR | UMIC | 94.01 | 0.75 | 93.26 | 99.84 | 72.17 | 4.66 | 67.50 | 72.38 |
| United Republic of Tanzania        | TZA | 2010 | AFR | LMIC | 36.02 | 0.54 | 35.48 | 37.80 | 30.77 | 1.99 | 28.78 | 81.11 |
| United Republic of Tanzania        | TZA | 2011 | AFR | LMIC | 37.29 | 1.15 | 36.13 | 37.82 | 34.47 | 2.23 | 32.24 | 89.23 |
| United Republic of Tanzania        | TZA | 2012 | AFR | LMIC | 37.79 | 0.29 | 37.50 | 42.48 | 28.90 | 1.87 | 27.04 | 72.10 |
| United Republic of Tanzania        | TZA | 2013 | AFR | LMIC | 44.00 | 0.78 | 43.22 | 48.98 | 37.94 | 2.45 | 35.49 | 82.11 |
| United Republic of Tanzania        | TZA | 2014 | AFR | LMIC | 43.16 | 1.22 | 41.94 | 47.35 | 38.51 | 2.49 | 36.02 | 85.88 |
| United Republic of Tanzania        | TZA | 2015 | AFR | LMIC | 45.00 | 1.30 | 43.70 | 48.99 | 40.98 | 2.65 | 38.33 | 87.71 |
| United Republic of Tanzania        | TZA | 2016 | AFR | LMIC | 47.36 | 0.80 | 46.56 | 53.96 | 40.73 | 2.63 | 38.10 | 81.83 |
| United Republic of Tanzania        | TZA | 2017 | AFR | LMIC | 53.33 | 1.58 | 51.75 | 60.81 | 48.89 | 3.16 | 45.73 | 88.38 |
| United Republic of Tanzania        | TZA | 2018 | AFR | LMIC | 59.70 | 0.94 | 58.76 | 73.17 | 51.13 | 3.30 | 47.82 | 81.38 |
| United Republic of Tanzania        | TZA | 2019 | AFR | LMIC | 65.46 | 0.59 | 64.87 | 84.17 | 53.51 | 3.46 | 50.06 | 77.16 |
| Uganda                             | UGA | 2010 | AFR | LIC  | 75.54 | 3.27 | 72.27 | 63.28 | 75.39 | 4.87 | 70.52 | 97.57 |
| Uganda                             | UGA | 2011 | AFR | LIC  | 76.05 | 2.05 | 74.00 | 70.36 | 67.58 | 4.37 | 63.21 | 85.42 |
| Uganda                             | UGA | 2012 | AFR | LIC  | 72.44 | 2.07 | 70.37 | 63.23 | 65.67 | 4.24 | 61.42 | 87.28 |
| Uganda                             | UGA | 2013 | AFR | LIC  | 69.87 | 0.62 | 69.25 | 63.19 | 57.07 | 3.69 | 53.38 | 77.09 |
| Uganda                             | UGA | 2014 | AFR | LIC  | 67.11 | 1.95 | 65.16 | 56.42 | 60.10 | 3.88 | 56.21 | 86.27 |
| Uganda                             | UGA | 2015 | AFR | LIC  | 63.62 | 2.20 | 61.42 | 48.40 | 60.15 | 3.89 | 56.26 | 91.60 |
| Uganda                             | UGA | 2016 | AFR | LIC  | 59.16 | 0.56 | 58.61 | 48.34 | 47.21 | 3.05 | 44.16 | 75.35 |
| Uganda                             | UGA | 2017 | AFR | LIC  | 62.53 | 1.82 | 60.71 | 49.95 | 55.98 | 3.62 | 52.36 | 86.24 |
| Uganda                             | UGA | 2018 | AFR | LIC  | 73.07 | 1.03 | 72.04 | 66.73 | 62.09 | 4.01 | 58.08 | 80.62 |
| Uganda                             | UGA | 2019 | AFR | LIC  | 84.06 | 1.02 | 83.04 | 85.54 | 70.68 | 4.57 | 66.11 | 79.61 |
| Ukraine                            | UKR | 2010 | EUR | LMIC | 60.91 | 0.69 | 60.22 | 49.81 | 42.33 | 2.74 | 39.60 | 65.76 |
| Ukraine                            | UKR | 2011 | EUR | LMIC | 71.50 | 0.21 | 71.29 | 56.88 | 49.74 | 3.22 | 46.53 | 65.26 |
| Ukraine                            | UKR | 2012 | EUR | LMIC | 88.90 | 0.30 | 88.59 | 97.48 | 61.62 | 3.98 | 57.64 | 65.06 |
| Ukraine                            | UKR | 2013 | EUR | LMIC | 82.35 | 0.30 | 82.05 | 83.33 | 57.07 | 3.69 | 53.38 | 65.06 |
| Ukraine                            | UKR | 2014 | EUR | LMIC | 69.41 | 0.53 | 68.88 | 62.45 | 48.41 | 3.13 | 45.28 | 65.73 |
| Ukraine                            | UKR | 2015 | EUR | LMIC | 73.81 | 0.23 | 73.58 | 62.49 | 51.23 | 3.31 | 47.92 | 65.13 |
| Ukraine                            | UKR | 2016 | EUR | LMIC | 72.83 | 0.30 | 72.52 | 64.40 | 50.49 | 3.26 | 47.22 | 65.11 |
| Ukraine                            | UKR | 2017 | EUR | LMIC | 70.78 | 0.30 | 70.48 | 60.56 | 49.07 | 3.17 | 45.90 | 65.13 |
| Ukraine                            | UKR | 2018 | EUR | LMIC | 70.41 | 0.52 | 69.89 | 64.38 | 49.10 | 3.17 | 45.92 | 65.71 |
| Ukraine                            | UKR | 2019 | EUR | LMIC | 82.46 | 0.74 | 81.72 | 64.56 | 66.19 | 4.28 | 61.91 | 75.76 |
| Venezuela (Bolivarian Republic of) | VEN | 2010 | AMR | UMIC | 84.95 | 0.41 | 84.54 | 99.47 | 62.06 | 4.01 | 58.05 | 68.66 |
| Venezuela (Bolivarian Republic of) | VEN | 2011 | AMR | UMIC | 83.74 | 0.31 | 83.43 | 99.45 | 59.80 | 3.87 | 55.94 | 67.05 |
| Venezuela (Bolivarian Republic of) | VEN | 2012 | AMR | UMIC | 82.94 | 0.27 | 82.67 | 99.43 | 58.64 | 3.79 | 54.85 | 66.35 |
| Venezuela (Bolivarian Republic of) | VEN | 2013 | AMR | UMIC | 84.46 | 0.36 | 84.09 | 99.45 | 61.05 | 3.95 | 57.10 | 67.91 |
| Venezuela (Bolivarian Republic of) | VEN | 2014 | AMR | UMIC | 92.19 | 2.64 | 89.54 | 99.65 | 83.80 | 5.42 | 78.38 | 87.53 |
| Venezuela (Bolivarian Republic of) | VEN | 2015 | AMR | UMIC | 92.09 | 2.63 | 89.46 | 99.65 | 83.60 | 5.40 | 78.20 | 87.41 |
| Venezuela (Bolivarian Republic of) | VEN | 2016 | AMR | UMIC | 92.78 | 2.76 | 90.03 | 99.65 | 85.12 | 5.50 | 79.62 | 88.44 |

|                                    |     |      |     |      |       |      |       |       |        |      |       |        |
|------------------------------------|-----|------|-----|------|-------|------|-------|-------|--------|------|-------|--------|
| Venezuela (Bolivarian Republic of) | VEN | 2017 | AMR | UMIC | 96.55 | 4.74 | 91.81 | 99.73 | 99.21  | 6.41 | 92.80 | 101.07 |
| Venezuela (Bolivarian Republic of) | VEN | 2018 | AMR | UMIC | 95.63 | 3.94 | 91.69 | 99.70 | 94.31  | 6.10 | 88.21 | 96.21  |
| Venezuela (Bolivarian Republic of) | VEN | 2019 | AMR | UMIC | 95.94 | 4.17 | 91.77 | 99.71 | 95.82  | 6.19 | 89.63 | 97.66  |
| Viet Nam                           | VNM | 2010 | WPR | LMIC | 54.37 | 1.27 | 53.10 | 72.07 | 47.76  | 3.09 | 44.67 | 84.13  |
| Viet Nam                           | VNM | 2011 | WPR | LMIC | 54.99 | 0.71 | 54.28 | 74.04 | 46.44  | 3.00 | 43.44 | 80.03  |
| Viet Nam                           | VNM | 2012 | WPR | LMIC | 58.42 | 0.80 | 57.63 | 80.06 | 49.55  | 3.20 | 46.34 | 80.42  |
| Viet Nam                           | VNM | 2013 | WPR | LMIC | 58.53 | 0.88 | 57.65 | 80.07 | 49.98  | 3.23 | 46.75 | 81.10  |
| Viet Nam                           | VNM | 2014 | WPR | LMIC | 58.05 | 0.55 | 57.50 | 82.06 | 46.29  | 2.99 | 43.30 | 75.31  |
| Viet Nam                           | VNM | 2015 | WPR | LMIC | 60.41 | 0.55 | 59.87 | 86.17 | 48.41  | 3.13 | 45.28 | 75.64  |
| Viet Nam                           | VNM | 2016 | WPR | LMIC | 62.62 | 0.68 | 61.93 | 88.26 | 52.26  | 3.38 | 48.88 | 78.92  |
| Viet Nam                           | VNM | 2017 | WPR | LMIC | 64.30 | 0.57 | 63.73 | 92.41 | 52.47  | 3.39 | 49.08 | 77.01  |
| Viet Nam                           | VNM | 2018 | WPR | LMIC | 63.32 | 0.58 | 62.74 | 90.33 | 51.91  | 3.36 | 48.55 | 77.39  |
| Viet Nam                           | VNM | 2019 | WPR | LMIC | 66.72 | 0.62 | 66.10 | 96.63 | 54.84  | 3.54 | 51.30 | 77.60  |
| Vanuatu                            | VUT | 2010 | WPR | LMIC | 72.69 | 0.22 | 72.48 | 77.80 | 50.93  | 3.29 | 47.64 | 65.73  |
| Vanuatu                            | VUT | 2011 | WPR | LMIC | 64.44 | 0.39 | 64.05 | 71.21 | 44.83  | 2.90 | 41.93 | 65.47  |
| Vanuatu                            | VUT | 2012 | WPR | LMIC | 75.41 | 0.33 | 75.07 | 94.12 | 52.29  | 3.38 | 48.91 | 65.16  |
| Vanuatu                            | VUT | 2013 | WPR | LMIC | 76.29 | 0.25 | 76.04 | 91.71 | 52.90  | 3.42 | 49.48 | 65.08  |
| Vanuatu                            | VUT | 2014 | WPR | LMIC | 66.99 | 0.23 | 66.75 | 71.23 | 46.43  | 3.00 | 43.43 | 65.06  |
| Vanuatu                            | VUT | 2015 | WPR | LMIC | 80.44 | 0.24 | 80.20 | 99.13 | 55.93  | 3.62 | 52.32 | 65.24  |
| Vanuatu                            | VUT | 2016 | WPR | LMIC | 61.70 | 0.29 | 61.41 | 62.96 | 42.80  | 2.77 | 40.03 | 65.19  |
| Vanuatu                            | VUT | 2017 | WPR | LMIC | 61.83 | 0.23 | 61.61 | 60.99 | 42.85  | 2.77 | 40.08 | 65.06  |
| Vanuatu                            | VUT | 2018 | WPR | LMIC | 62.08 | 0.64 | 61.44 | 69.09 | 43.45  | 2.81 | 40.64 | 66.15  |
| Vanuatu                            | VUT | 2019 | WPR | LMIC | 68.18 | 0.27 | 67.92 | 86.58 | 35.31  | 2.28 | 33.03 | 48.63  |
| Samoa                              | WSM | 2010 | WPR | UMIC | 92.48 | 0.46 | 92.02 | 97.05 | 67.70  | 4.38 | 63.32 | 68.81  |
| Samoa                              | WSM | 2011 | WPR | UMIC | 94.56 | 1.05 | 93.51 | 97.13 | 74.58  | 4.82 | 69.76 | 74.61  |
| Samoa                              | WSM | 2012 | WPR | UMIC | 95.82 | 0.85 | 94.98 | 97.15 | 77.16  | 4.99 | 72.17 | 75.98  |
| Samoa                              | WSM | 2013 | WPR | UMIC | 96.09 | 0.84 | 95.25 | 97.16 | 77.77  | 5.03 | 72.75 | 76.38  |
| Samoa                              | WSM | 2014 | WPR | UMIC | 94.29 | 0.87 | 93.43 | 97.11 | 73.33  | 4.74 | 68.59 | 73.42  |
| Samoa                              | WSM | 2015 | WPR | UMIC | 95.23 | 0.91 | 94.33 | 97.14 | 75.89  | 4.91 | 70.98 | 75.25  |
| Samoa                              | WSM | 2016 | WPR | UMIC | 93.86 | 0.71 | 93.15 | 97.09 | 71.60  | 4.63 | 66.97 | 71.89  |
| Samoa                              | WSM | 2017 | WPR | UMIC | 96.33 | 0.85 | 95.48 | 97.16 | 78.37  | 5.07 | 73.31 | 76.78  |
| Samoa                              | WSM | 2018 | WPR | UMIC | 93.62 | 0.65 | 92.97 | 97.08 | 70.77  | 4.57 | 66.20 | 71.20  |
| Samoa                              | WSM | 2019 | WPR | UMIC | 98.10 | 1.66 | 96.44 | 97.22 | 84.38  | 5.45 | 78.92 | 81.84  |
| Yemen                              | YEM | 2010 | EMR | LIC  | 81.15 | 0.75 | 80.40 | 63.87 | 64.85  | 4.19 | 60.65 | 75.44  |
| Yemen                              | YEM | 2011 | EMR | LIC  | 81.48 | 0.83 | 80.64 | 62.12 | 67.64  | 4.37 | 63.26 | 78.45  |
| Yemen                              | YEM | 2012 | EMR | LIC  | 92.17 | 0.84 | 91.33 | 80.99 | 75.49  | 4.88 | 70.61 | 77.31  |
| Yemen                              | YEM | 2013 | EMR | LIC  | 93.17 | 0.84 | 92.33 | 87.10 | 72.31  | 4.67 | 67.63 | 73.25  |
| Yemen                              | YEM | 2014 | EMR | LIC  | 87.64 | 1.20 | 86.44 | 71.25 | 74.33  | 4.80 | 69.52 | 80.43  |
| Yemen                              | YEM | 2015 | EMR | LIC  | 68.36 | 1.97 | 66.39 | 41.45 | 61.33  | 3.96 | 57.37 | 86.41  |
| Yemen                              | YEM | 2016 | EMR | LIC  | 85.61 | 3.30 | 82.31 | 60.46 | 82.96  | 5.36 | 77.59 | 94.27  |
| Yemen                              | YEM | 2017 | EMR | LIC  | 89.23 | 5.75 | 83.48 | 62.26 | 100.00 | 6.46 | 93.54 | 112.05 |
| Yemen                              | YEM | 2018 | EMR | LIC  | 81.05 | 2.32 | 78.73 | 58.70 | 72.86  | 4.71 | 68.15 | 86.56  |
| Yemen                              | YEM | 2019 | EMR | LIC  | 86.76 | 3.32 | 83.43 | 62.21 | 83.95  | 5.43 | 78.52 | 94.11  |
| South Africa                       | ZAF | 2010 | AFR | UMIC | 59.71 | 0.32 | 59.39 | 94.41 | 44.01  | 2.84 | 41.16 | 69.31  |
| South Africa                       | ZAF | 2011 | AFR | UMIC | 61.54 | 0.29 | 61.24 | 98.68 | 44.88  | 2.90 | 41.97 | 68.54  |
| South Africa                       | ZAF | 2012 | AFR | UMIC | 57.00 | 0.39 | 56.61 | 88.08 | 43.00  | 2.78 | 40.22 | 71.05  |
| South Africa                       | ZAF | 2013 | AFR | UMIC | 55.76 | 0.23 | 55.53 | 88.05 | 40.09  | 2.59 | 37.50 | 67.52  |

---

|              |     |      |     |      |       |      |       |       |       |      |       |       |
|--------------|-----|------|-----|------|-------|------|-------|-------|-------|------|-------|-------|
| South Africa | ZAF | 2014 | AFR | UMIC | 57.58 | 0.62 | 56.96 | 88.10 | 45.32 | 2.93 | 42.39 | 74.42 |
| South Africa | ZAF | 2015 | AFR | UMIC | 56.01 | 0.40 | 55.61 | 85.99 | 42.49 | 2.75 | 39.75 | 71.47 |
| South Africa | ZAF | 2016 | AFR | UMIC | 55.30 | 0.28 | 55.03 | 85.97 | 40.53 | 2.62 | 37.91 | 68.89 |
| South Africa | ZAF | 2017 | AFR | UMIC | 62.02 | 0.36 | 61.66 | 98.69 | 46.03 | 2.98 | 43.06 | 69.83 |
| South Africa | ZAF | 2018 | AFR | UMIC | 61.80 | 0.33 | 61.47 | 98.68 | 45.47 | 2.94 | 42.53 | 69.19 |
| South Africa | ZAF | 2019 | AFR | UMIC | 62.05 | 0.37 | 61.69 | 98.69 | 46.11 | 2.98 | 43.13 | 69.92 |
| Zambia       | ZMB | 2010 | AFR | LMIC | 78.10 | 2.85 | 75.25 | 87.11 | 74.64 | 4.82 | 69.82 | 92.78 |
| Zambia       | ZMB | 2011 | AFR | LMIC | 74.57 | 2.13 | 72.44 | 85.21 | 67.40 | 4.36 | 63.04 | 87.03 |
| Zambia       | ZMB | 2012 | AFR | LMIC | 66.95 | 0.52 | 66.43 | 79.56 | 51.24 | 3.31 | 47.93 | 72.15 |
| Zambia       | ZMB | 2013 | AFR | LMIC | 68.97 | 0.65 | 68.32 | 79.60 | 56.75 | 3.67 | 53.08 | 77.69 |
| Zambia       | ZMB | 2014 | AFR | LMIC | 68.08 | 0.69 | 67.38 | 77.78 | 56.49 | 3.65 | 52.84 | 78.41 |
| Zambia       | ZMB | 2015 | AFR | LMIC | 66.08 | 0.77 | 65.31 | 74.16 | 55.44 | 3.58 | 51.85 | 79.40 |
| Zambia       | ZMB | 2016 | AFR | LMIC | 69.02 | 0.66 | 68.36 | 79.60 | 56.88 | 3.68 | 53.20 | 77.83 |
| Zambia       | ZMB | 2017 | AFR | LMIC | 66.03 | 0.75 | 65.28 | 74.16 | 55.27 | 3.57 | 51.69 | 79.18 |
| Zambia       | ZMB | 2018 | AFR | LMIC | 63.26 | 0.65 | 62.61 | 72.35 | 50.14 | 3.24 | 46.90 | 74.92 |
| Zambia       | ZMB | 2019 | AFR | LMIC | 66.30 | 0.73 | 65.56 | 77.75 | 52.28 | 3.38 | 48.90 | 74.58 |
| Zimbabwe     | ZWE | 2010 | AFR | LMIC | 95.89 | 2.75 | 93.15 | 89.13 | 86.20 | 5.57 | 80.62 | 86.56 |
| Zimbabwe     | ZWE | 2011 | AFR | LMIC | 87.58 | 1.16 | 86.42 | 76.25 | 74.11 | 4.79 | 69.32 | 80.21 |
| Zimbabwe     | ZWE | 2012 | AFR | LMIC | 85.92 | 0.87 | 85.05 | 74.20 | 71.25 | 4.61 | 66.65 | 78.37 |
| Zimbabwe     | ZWE | 2013 | AFR | LMIC | 91.16 | 1.36 | 89.80 | 82.55 | 77.79 | 5.03 | 72.77 | 81.03 |
| Zimbabwe     | ZWE | 2014 | AFR | LMIC | 86.56 | 0.78 | 85.78 | 76.23 | 70.79 | 4.58 | 66.21 | 77.19 |
| Zimbabwe     | ZWE | 2015 | AFR | LMIC | 91.02 | 1.25 | 89.77 | 82.55 | 77.24 | 4.99 | 72.24 | 80.48 |
| Zimbabwe     | ZWE | 2016 | AFR | LMIC | 87.89 | 0.86 | 87.03 | 82.48 | 68.70 | 4.44 | 64.26 | 73.85 |
| Zimbabwe     | ZWE | 2017 | AFR | LMIC | 91.83 | 1.07 | 90.76 | 84.69 | 77.02 | 4.98 | 72.04 | 79.37 |
| Zimbabwe     | ZWE | 2018 | AFR | LMIC | 91.78 | 0.80 | 90.98 | 86.85 | 74.48 | 4.81 | 69.67 | 76.57 |
| Zimbabwe     | ZWE | 2019 | AFR | LMIC | 79.15 | 0.71 | 78.44 | 64.42 | 63.50 | 4.10 | 59.40 | 75.73 |

---

**Figure S4. Sensitivity analysis: average efficiency scores of 14 alternative models compared with the main model**

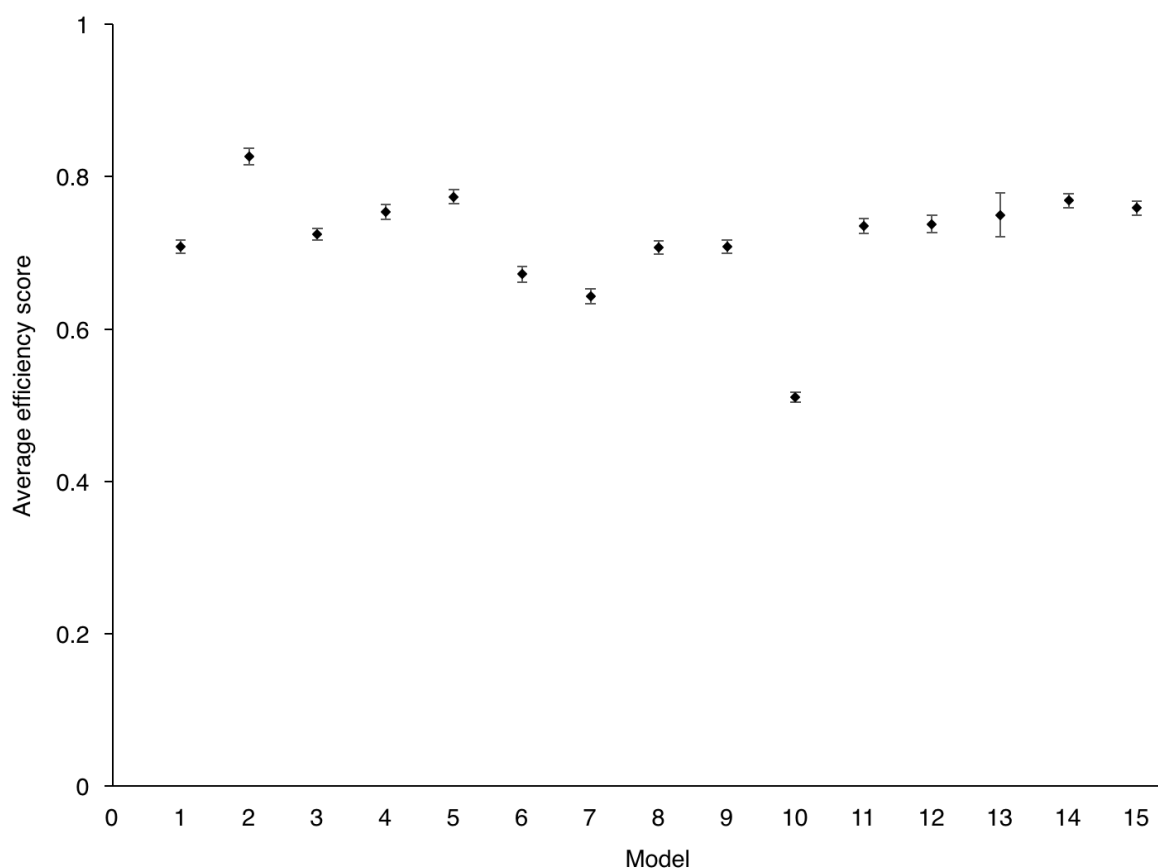

Note: Error bars represent 95% Confidence intervals of the mean efficiency score. Model 1 = Main model. Model 2 = Main SFA based on Greene (2005) true random effects time-varying model using all the variables in the main model. Model 3 = Main model, excluding bottom 5% outlier countries in terms of efficiency scores. Model 4 = Main model, excluding top 5% outlier countries in terms of efficiency scores. Model 5 = Main model, excluding top and bottom 5% outlier countries in terms of efficiency scores. Model 6 = Main model input and independent variables, three outputs using outcome-adjusted treatment coverage for new DS-TB, previously treated DS-TB and MDR-TB. Model 7 = Main model input, two outputs using outcome-adjusted treatment coverage for new DS-TB and previously treated DS-TB. The model excludes MDR-TB related independent variables. Model 8 = Main model, excluding SDG variables listed as included in Table S3 in Supplement 1. Model 9 = Main model, using IHME estimates for sources of national TB spending (out-of-pocket, pre-paid private and development assistance for health) instead of WHO estimates for the proportion of national TB spending accounted for by external sources. Model 10 = Same as main model but assumes constant returns to scale. Model 11 = Main model, assuming 3-year investment lag. Model 12 = Main model, assuming 5-year investment lag. Model 13: Cross-sectional DEA, same as the main model using 10-year average for all variables. Model 14 = SFA based on Battese and Coelli (1998) using all the variables in the main model. Model 15 = SFA based on Pitt and Lee (1991) using all the variables in the main model.

Figure S5a. Graph of average log of input and output by country: 2010-2019

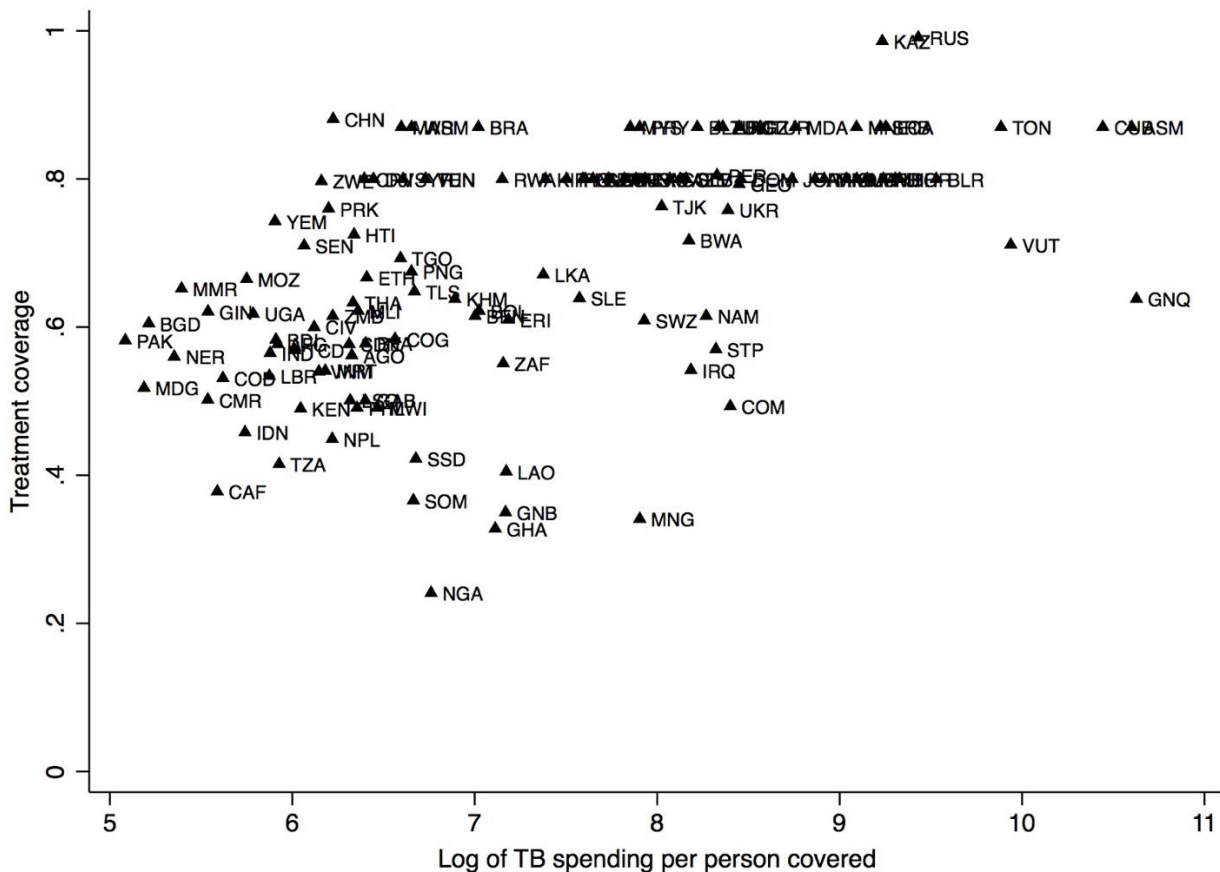

Figure S5b. Graph of average log of input and three outcome-adjusted coverage outputs by country: 2010-2019

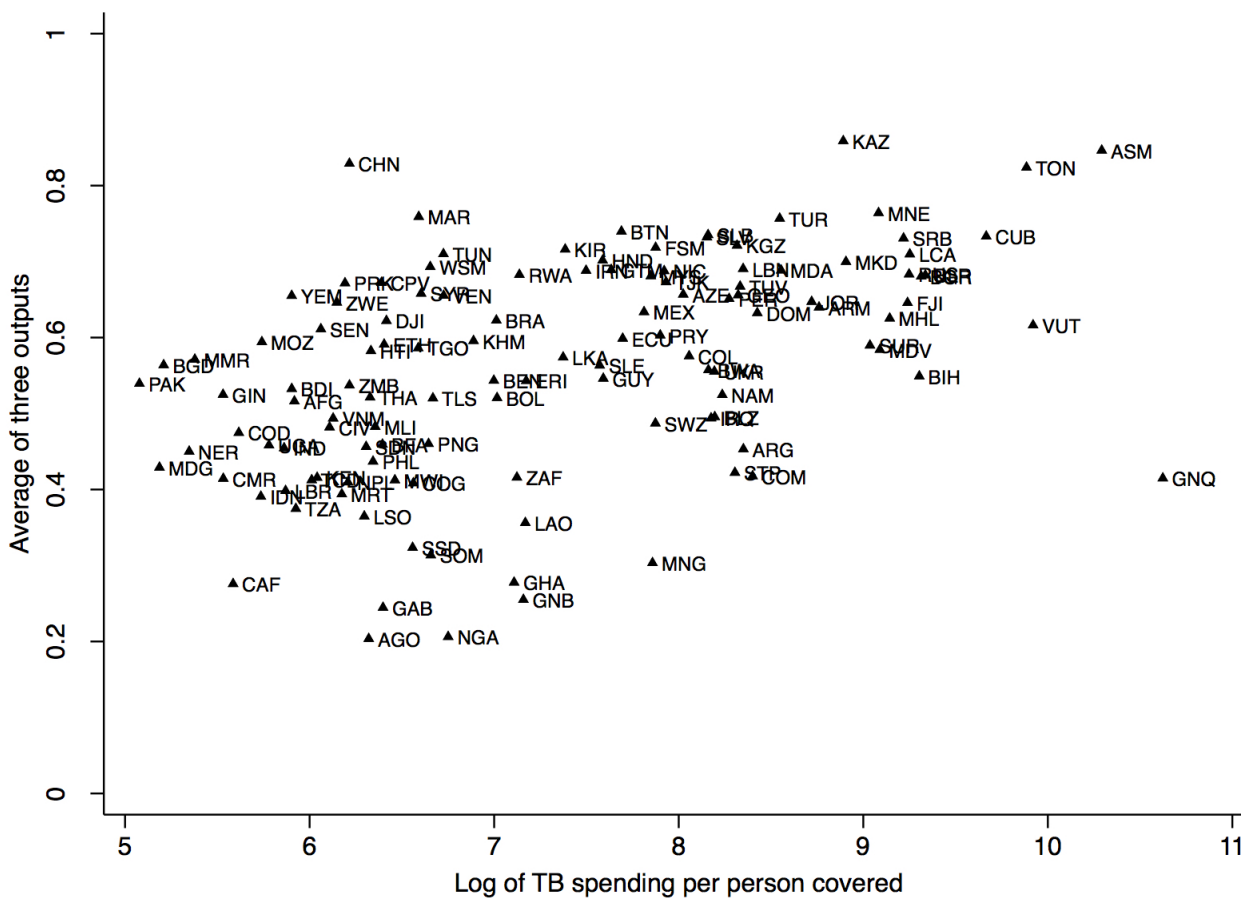

Figure S6. Average DEA and SFA efficiency scores by country between 2010-2019

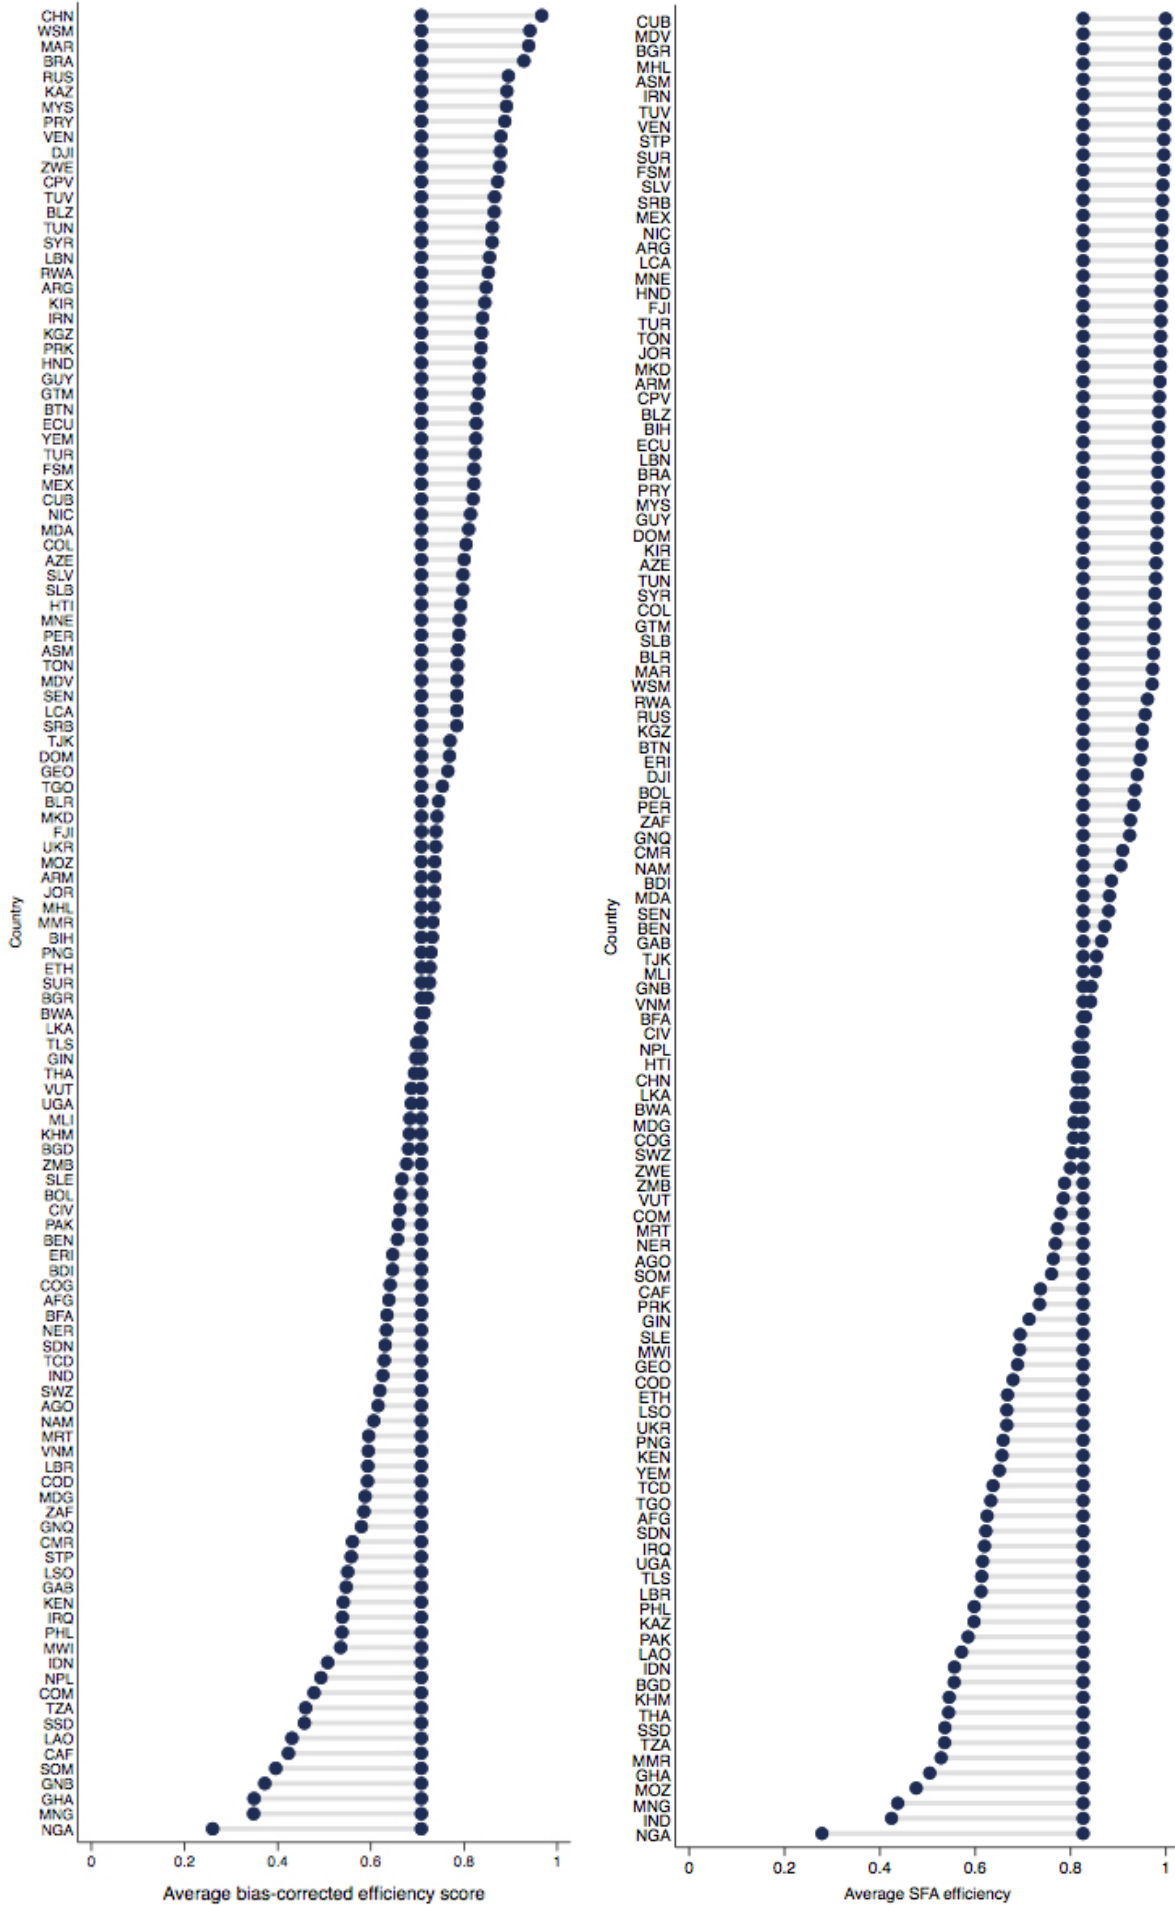



Figures S7a-7f. Descriptive plots of independent variables against bias-corrected efficiency scores (N = 1209 observations).

Figure S7a. Current health expenditure (% GDP)

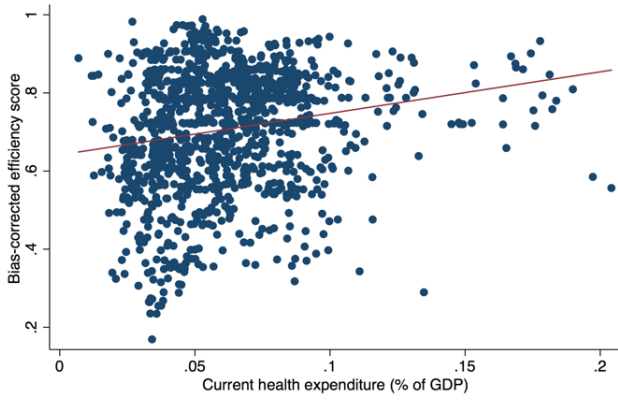

Figure S7b. UHC service coverage index

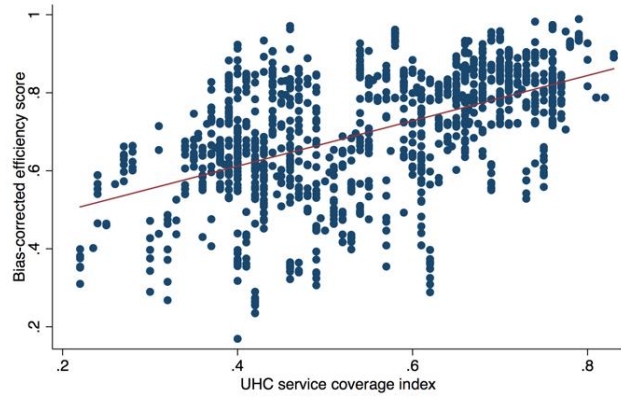

Figure S7c. Governance indicators

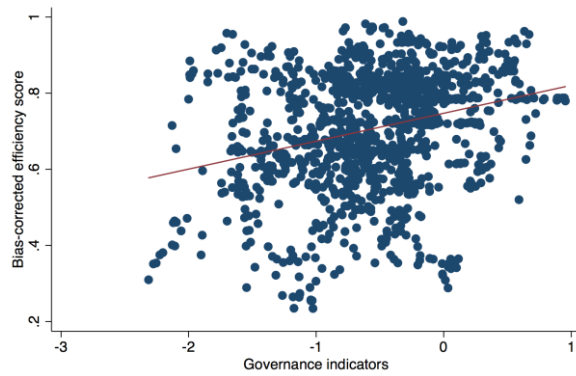

Figure S7d. Out-of-pocket expenditure (%CHE)

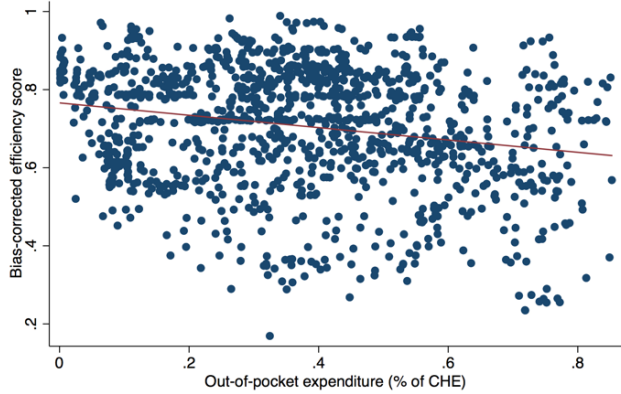

Figure S7e. Population living in slums

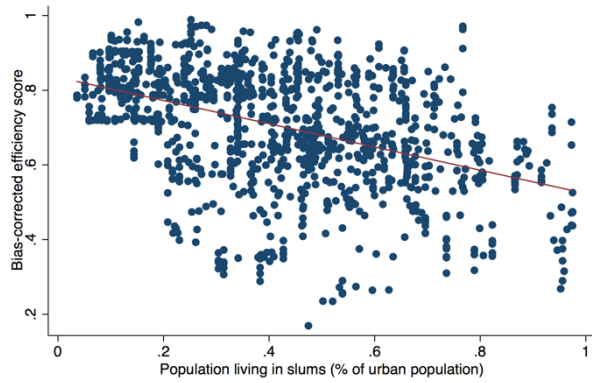

Figure S7f. TB incidence per 100k

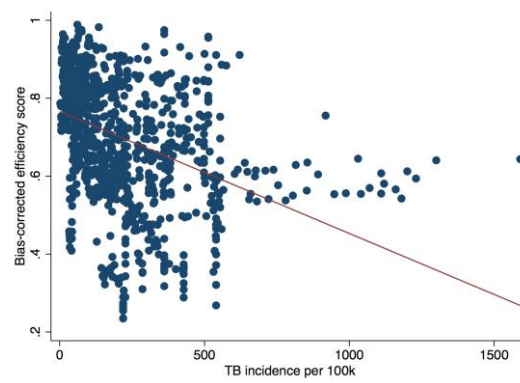

---

Note: Solid lines show the linear fit between variables on the y- and x-axes.

Figures S7g-7l. Descriptive plots of independent variables against SFA efficiency scores (N = 1209 observations).

Figure S7g. Current health expenditure (% GDP)

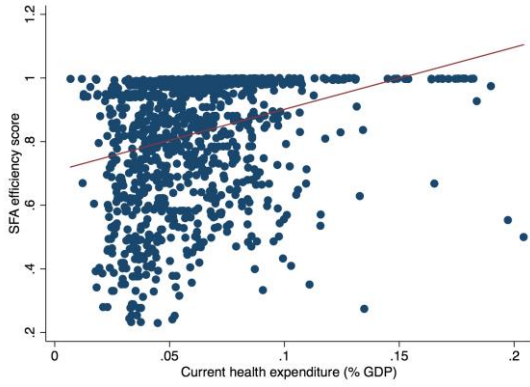

Figure S7h. UHC service coverage index

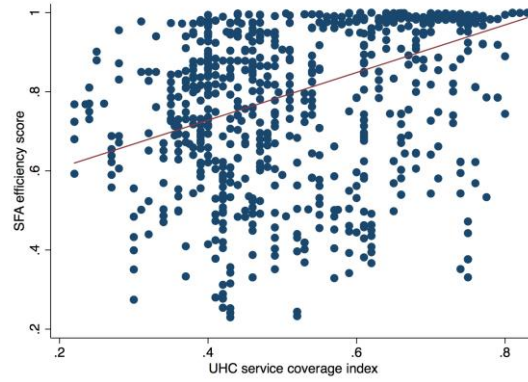

Figure S7i. Governance indicator

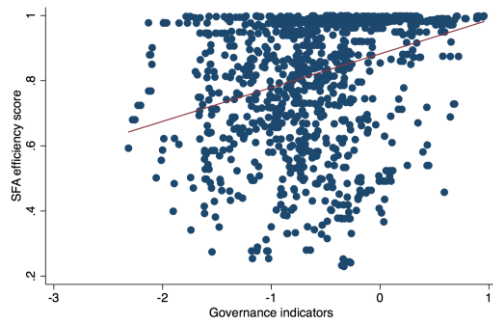

Figure S7j. Out-of-pocket expenditure (%CHE)

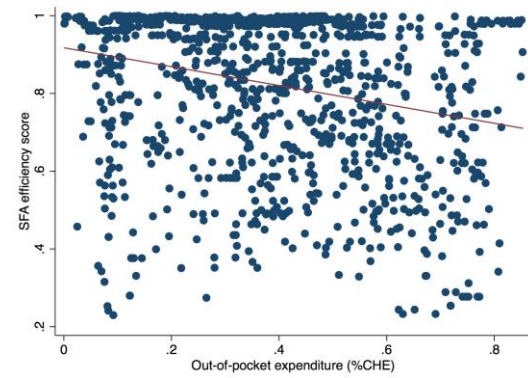

Figure S7k. Population living in slums

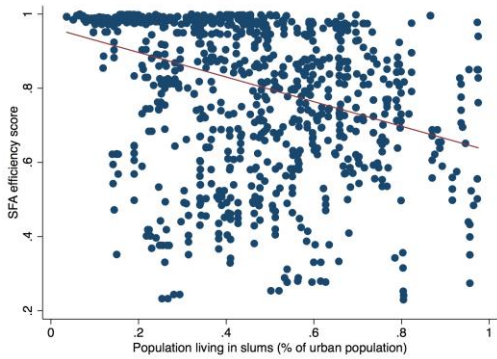

Figure S7l. TB incidence per 100k

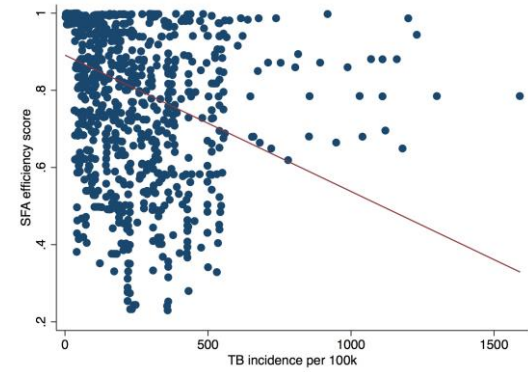

---

Note: Solid lines show the linear fit between variables on the y- and x-axes.

**Figures S8. Main versus sub-regional DEA analyses average scores and rankings**

**Figure S8a. Main versus sub-regional analysis average DEA efficiency scores**

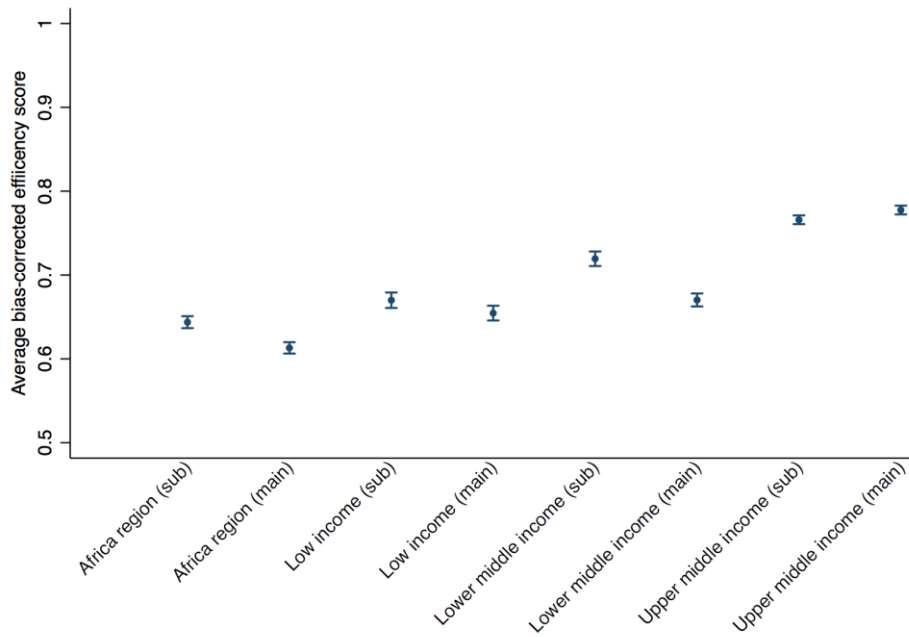

WHO Africa (n=429):  $\rho=0.9739$ ,  $p<0.0001$ ; WB Low income (n=279):  $\rho=0.9888$ ,  $p<0.0001$ ; WB lower-middle income (n=460):  $\rho=0.9864$ ,  $p<0.0001$ ; WB Upper middle-income (n=470):  $\rho=0.9937$ ,  $p<0.0001$ .

**Figure S8b. Main versus sub-regional DEA ranking (AFR)**

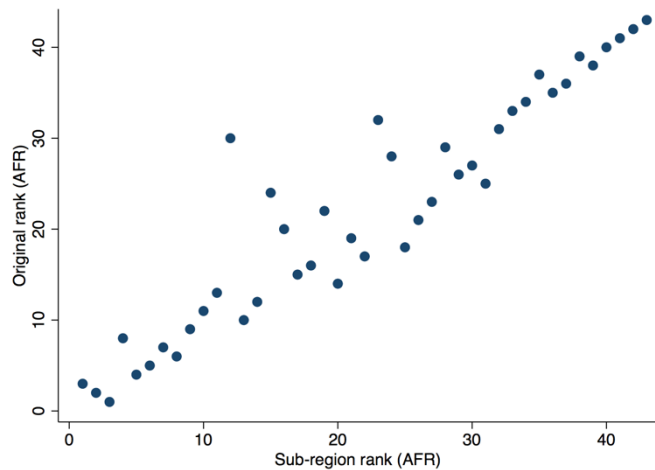

WHO Africa  $\rho=0.9394$ ,  $p<0.0001$

**Figure S8c. Main versus sub-regional DEA ranking (LIC)**

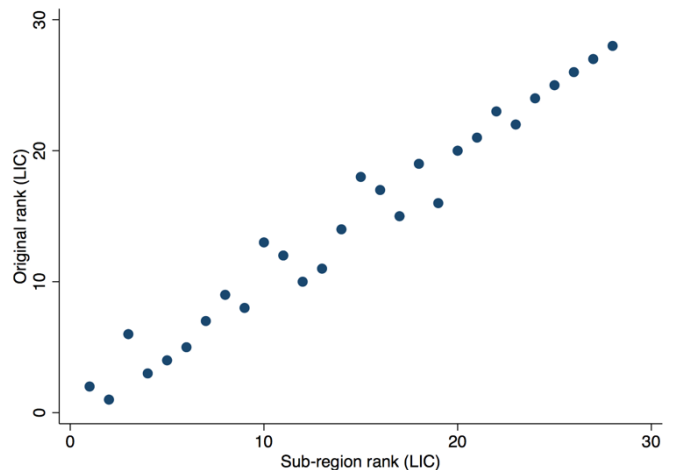

WB Low income  $\rho=0.9836$ ,  $p<0.0001$

**Figure S8d. Main versus sub-regional DEA ranking (LMIC)**

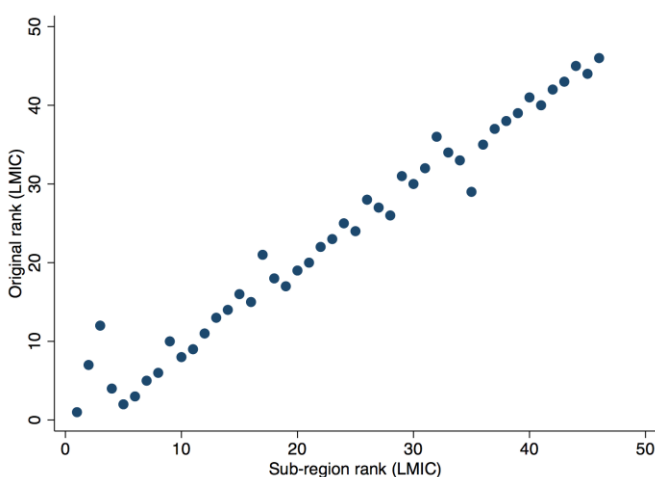

WB Lower-middle income  $\rho=0.9852$ ,  $p<0.0001$

**Figure S8e. Main versus sub-regional DEA ranking (UMIC)**

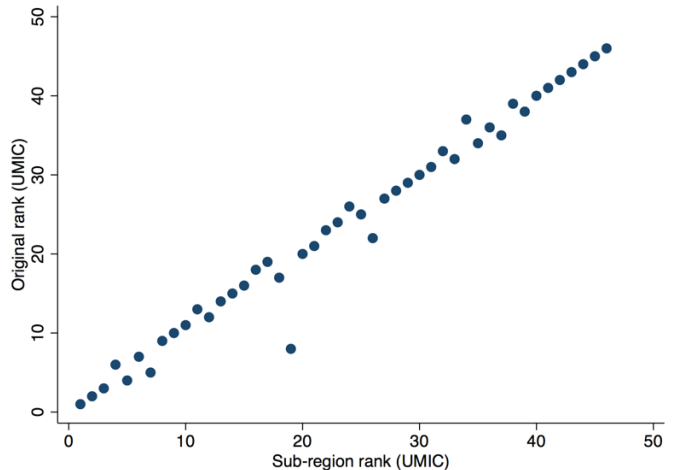

WB Upper-middle income  $\rho=0.9883$ ,  $p<0.0001$

**Table S5. Sub-regional DEA analysis regression results**

| Independent variables (n=25)                                                                       | Observed coefficient | Bootstrap standard error | P> z   | 95% bootstrap confidence intervals |         |
|----------------------------------------------------------------------------------------------------|----------------------|--------------------------|--------|------------------------------------|---------|
|                                                                                                    |                      |                          |        | Low                                | High    |
| <b>Africa region</b>                                                                               |                      |                          |        |                                    |         |
| Typical number of visits to a health facility after diagnosis for DS-TB treatment                  | 0.0005               | 0.0002                   | 0.0070 | 0.0001                             | 0.0008  |
| Typical number of visits to a health facility after diagnosis for MDR-TB treatment                 | 0.0001               | 0.0000                   | 0.0100 | 0.0000                             | 0.0001  |
| Estimated percentage of DS-TB cases that are hospitalised                                          | -0.0389              | 0.0343                   | 0.2570 | -0.1073                            | 0.0281  |
| Estimated percentage of MDR-TB cases that are hospitalised                                         | 0.0606               | 0.0160                   | 0.0000 | 0.0291                             | 0.0923  |
| Estimated average duration of stay for DS-TB cases if they are hospitalised                        | -0.0001              | 0.0004                   | 0.7450 | -0.0008                            | 0.0006  |
| Estimated average duration of stay for MDR cases if they are hospitalised                          | -0.0001              | 0.0001                   | 0.1050 | -0.0002                            | 0.0000  |
| Average of six World Governance Indicators                                                         | 0.0053               | 0.0188                   | 0.7760 | -0.0316                            | 0.0416  |
| Current health expenditure per capita, PPP (current international \$)                              | 0.0000               | 0.0000                   | 0.8510 | -0.0001                            | 0.0001  |
| Current health expenditure (% of GDP)                                                              | 0.1955               | 0.2828                   | 0.4890 | -0.3715                            | 0.7661  |
| External health expenditure (% of CHE)                                                             | -0.0078              | 0.0569                   | 0.8910 | -0.1225                            | 0.1033  |
| Out-of-pocket expenditure (% of CHE)                                                               | -0.0254              | 0.0491                   | 0.6050 | -0.1255                            | 0.0702  |
| Population total (log)                                                                             | 0.0000               | 0.0000                   | 0.0000 | 0.0000                             | 0.0000  |
| Population per km2                                                                                 | -0.0004              | 0.0001                   | 0.0000 | -0.0005                            | -0.0002 |
| Rural population (% of total population)                                                           | 0.1059               | 0.0659                   | 0.1080 | -0.0228                            | 0.2345  |
| TB spending accounted for by external sources (% of total TB spending, excluding private spending) | -0.0964              | 0.0242                   | 0.0000 | -0.1429                            | -0.0489 |
| TB incidence per 100k                                                                              | -0.0004              | 0.0000                   | 0.0000 | -0.0005                            | -0.0003 |
| MDR-TB incidence per 100k                                                                          | -0.0037              | 0.0016                   | 0.0170 | -0.0069                            | -0.0006 |
| UHC service coverage index                                                                         | 0.6030               | 0.1339                   | 0.0000 | 0.3391                             | 0.8779  |
| Population living in slums (% of urban population)                                                 | -0.0974              | 0.0475                   | 0.0400 | -0.1907                            | -0.0052 |
| Diabetes prevalence (% of population aged >= 18 years)                                             | 1.9912               | 0.7244                   | 0.0060 | 0.5785                             | 3.3895  |
| Alcohol use disorders, 12-month prevalence (% of population aged >= 15 years)                      | 0.4436               | 0.2995                   | 0.1390 | -0.1432                            | 1.0214  |
| GINI index (0=perfect equality, 100=perfect inequality)                                            | -0.5789              | 0.1265                   | 0.0000 | -0.8239                            | -0.3225 |
| Population living below the international poverty line (% of population)                           | -0.1465              | 0.0491                   | 0.0030 | -0.2419                            | -0.0499 |
| Prevalence of undernourishment (% of population)                                                   | -0.2488              | 0.0585                   | 0.0000 | -0.3612                            | -0.1308 |
| HIV prevalence (adults 15-49)                                                                      | 0.2472               | 0.2152                   | 0.2510 | -0.1662                            | 0.6658  |
| <b>Low income</b>                                                                                  |                      |                          |        |                                    |         |
| Typical number of visits to a health facility after diagnosis for DS-TB treatment                  | 0.0000               | 0.0002                   | 0.8080 | -0.0003                            | 0.0003  |
| Typical number of visits to a health facility after diagnosis for MDR-TB treatment                 | 0.0000               | 0.0000                   | 0.9410 | -0.0001                            | 0.0001  |
| Estimated percentage of DS-TB cases that are hospitalised                                          | -0.1598              | 0.0362                   | 0.0000 | -0.2284                            | -0.0879 |
| Estimated percentage of MDR-TB cases that are hospitalised                                         | 0.0109               | 0.0155                   | 0.4820 | -0.0182                            | 0.0415  |
| Estimated average duration of stay for DS-TB cases if they are hospitalised                        | -0.0001              | 0.0004                   | 0.6920 | -0.0008                            | 0.0006  |
| Estimated average duration of stay for MDR cases if they are hospitalised                          | 0.0001               | 0.0001                   | 0.0230 | 0.0000                             | 0.0002  |

|                                                                                                    |         |        |        |         |         |
|----------------------------------------------------------------------------------------------------|---------|--------|--------|---------|---------|
| Average of six World Governance Indicators                                                         | -0.0617 | 0.0257 | 0.0160 | -0.1122 | -0.0121 |
| Current health expenditure per capita, PPP (current international \$)                              | -0.0003 | 0.0002 | 0.1000 | -0.0006 | 0.0001  |
| Current health expenditure (% of GDP)                                                              | 1.1372  | 0.4167 | 0.0060 | 0.3205  | 1.9765  |
| External health expenditure (% of CHE)                                                             | -0.0294 | 0.0607 | 0.6280 | -0.1493 | 0.0910  |
| Out-of-pocket expenditure (% of CHE)                                                               | -0.1277 | 0.0573 | 0.0260 | -0.2374 | -0.0147 |
| Population total (log)                                                                             | 0.0000  | 0.0000 | 0.0000 | 0.0000  | 0.0000  |
| Population per km2                                                                                 | 0.0000  | 0.0001 | 0.7240 | -0.0002 | 0.0002  |
| Rural population (% of total population)                                                           | -0.2256 | 0.0880 | 0.0100 | -0.4011 | -0.0517 |
| TB spending accounted for by external sources (% of total TB spending, excluding private spending) | -0.0731 | 0.0214 | 0.0010 | -0.1145 | -0.0316 |
| TB incidence per 100k                                                                              | -0.0006 | 0.0001 | 0.0000 | -0.0008 | -0.0004 |
| MDR-TB incidence per 100k                                                                          | -0.0056 | 0.0021 | 0.0070 | -0.0099 | -0.0017 |
| UHC service coverage index                                                                         | 0.2497  | 0.1308 | 0.0560 | -0.0068 | 0.4983  |
| Population living in slums (% of urban population)                                                 | -0.1539 | 0.0552 | 0.0050 | -0.2628 | -0.0438 |
| Diabetes prevalence (% of population aged >= 18 years)                                             | 1.8080  | 0.5972 | 0.0020 | 0.6010  | 2.9661  |
| Alcohol use disorders, 12-month prevalence (% of population aged >= 15 years)                      | -0.3108 | 0.3755 | 0.4080 | -1.0566 | 0.4091  |
| GINI index (0=perfect equality, 100=perfect inequality)                                            | 0.6855  | 0.1903 | 0.0000 | 0.3104  | 1.0556  |
| Population living below the international poverty line (% of population)                           | -0.3013 | 0.0503 | 0.0000 | -0.3980 | -0.2020 |
| Prevalence of undernourishment (% of population)                                                   | 0.1515  | 0.0927 | 0.1020 | -0.0284 | 0.3394  |
| HIV prevalence (adults 15-49)                                                                      | -0.3009 | 0.4620 | 0.5150 | -1.2026 | 0.5974  |

---

**Lower-middle income**

---

|                                                                                                    |         |        |        |         |         |
|----------------------------------------------------------------------------------------------------|---------|--------|--------|---------|---------|
| Typical number of visits to a health facility after diagnosis for DS-TB treatment                  | -0.0004 | 0.0002 | 0.0170 | -0.0008 | 0.0000  |
| Typical number of visits to a health facility after diagnosis for MDR-TB treatment                 | -0.0001 | 0.0000 | 0.0020 | -0.0002 | -0.0001 |
| Estimated percentage of DS-TB cases that are hospitalised                                          | -0.0531 | 0.0447 | 0.2350 | -0.1381 | 0.0364  |
| Estimated percentage of MDR-TB cases that are hospitalised                                         | 0.0211  | 0.0297 | 0.4790 | -0.0338 | 0.0805  |
| Estimated average duration of stay for DS-TB cases if they are hospitalised                        | 0.0007  | 0.0005 | 0.1710 | -0.0003 | 0.0017  |
| Estimated average duration of stay for MDR cases if they are hospitalised                          | 0.0002  | 0.0001 | 0.1800 | -0.0001 | 0.0004  |
| Average of six World Governance Indicators                                                         | 0.0728  | 0.0295 | 0.0140 | 0.0140  | 0.1322  |
| Current health expenditure per capita, PPP (current international \$)                              | -0.0007 | 0.0001 | 0.0000 | -0.0009 | -0.0004 |
| Current health expenditure (% of GDP)                                                              | 3.8868  | 0.5948 | 0.0000 | 2.7192  | 5.0208  |
| External health expenditure (% of CHE)                                                             | -0.2047 | 0.0976 | 0.0360 | -0.3986 | -0.0085 |
| Out-of-pocket expenditure (% of CHE)                                                               | -0.2553 | 0.0766 | 0.0010 | -0.4093 | -0.1107 |
| Population total (log)                                                                             | 0.0000  | 0.0000 | 0.5130 | 0.0000  | 0.0000  |
| Population per km2                                                                                 | 0.0000  | 0.0000 | 0.9510 | -0.0001 | 0.0001  |
| Rural population (% of total population)                                                           | -0.3100 | 0.0672 | 0.0000 | -0.4377 | -0.1765 |
| TB spending accounted for by external sources (% of total TB spending, excluding private spending) | -0.1784 | 0.0396 | 0.0000 | -0.2551 | -0.0996 |
| TB incidence per 100k                                                                              | -0.0003 | 0.0001 | 0.0000 | -0.0004 | -0.0002 |
| MDR-TB incidence per 100k                                                                          | -0.0037 | 0.0016 | 0.0180 | -0.0069 | -0.0007 |
| UHC service coverage index                                                                         | 1.5538  | 0.2126 | 0.0000 | 1.1286  | 1.9773  |
| Population living in slums (% of urban population)                                                 | -0.2258 | 0.0628 | 0.0000 | -0.3481 | -0.1033 |
| Diabetes prevalence (% of population aged >= 18 years)                                             | 3.6139  | 0.4068 | 0.0000 | 2.7668  | 4.3555  |

|                                                                               |         |        |        |         |         |
|-------------------------------------------------------------------------------|---------|--------|--------|---------|---------|
| Alcohol use disorders, 12-month prevalence (% of population aged >= 15 years) | -2.1094 | 0.4226 | 0.0000 | -2.9366 | -1.2665 |
| GINI index (0=perfect equality, 100=perfect inequality)                       | -0.5838 | 0.1658 | 0.0000 | -0.8958 | -0.2449 |
| Population living below the international poverty line (% of population)      | 0.3862  | 0.1149 | 0.0010 | 0.1576  | 0.6032  |
| Prevalence of undernourishment (% of population)                              | 0.1206  | 0.1297 | 0.3520 | -0.1306 | 0.3738  |
| HIV prevalence (adults 15-49)                                                 | 0.2457  | 0.3146 | 0.4350 | -0.3734 | 0.8293  |

---

**Upper-middle income**

---

|                                                                                                    |         |        |        |         |         |
|----------------------------------------------------------------------------------------------------|---------|--------|--------|---------|---------|
| Typical number of visits to a health facility after diagnosis for DS-TB treatment                  | 0.0002  | 0.0001 | 0.0160 | 0.0000  | 0.0003  |
| Typical number of visits to a health facility after diagnosis for MDR-TB treatment                 | -0.0001 | 0.0000 | 0.0040 | -0.0001 | 0.0000  |
| Estimated percentage of DS-TB cases that are hospitalised                                          | -0.0539 | 0.0166 | 0.0010 | -0.0863 | -0.0205 |
| Estimated percentage of MDR-TB cases that are hospitalised                                         | 0.0331  | 0.0107 | 0.0020 | 0.0126  | 0.0536  |
| Estimated average duration of stay for DS-TB cases if they are hospitalised                        | 0.0002  | 0.0003 | 0.4070 | -0.0003 | 0.0007  |
| Estimated average duration of stay for MDR cases if they are hospitalised                          | 0.0000  | 0.0001 | 0.8050 | -0.0001 | 0.0001  |
| Average of six World Governance Indicators                                                         | -0.0088 | 0.0093 | 0.3460 | -0.0264 | 0.0098  |
| Current health expenditure per capita, PPP (current international \$)                              | 0.0000  | 0.0000 | 0.2010 | 0.0000  | 0.0000  |
| Current health expenditure (% of GDP)                                                              | 0.6636  | 0.1915 | 0.0010 | 0.2918  | 1.0372  |
| External health expenditure (% of CHE)                                                             | 0.0574  | 0.0725 | 0.4280 | -0.0859 | 0.2020  |
| Out-of-pocket expenditure (% of CHE)                                                               | -0.0338 | 0.0245 | 0.1670 | -0.0838 | 0.0121  |
| Population total (log)                                                                             | 0.0000  | 0.0000 | 0.0000 | 0.0000  | 0.0000  |
| Population per km2                                                                                 | 0.0000  | 0.0000 | 0.3810 | 0.0000  | 0.0000  |
| Rural population (% of total population)                                                           | 0.1030  | 0.0229 | 0.0000 | 0.0593  | 0.1507  |
| TB spending accounted for by external sources (% of total TB spending, excluding private spending) | -0.0721 | 0.0178 | 0.0000 | -0.1079 | -0.0383 |
| TB incidence per 100k                                                                              | -0.0004 | 0.0000 | 0.0000 | -0.0005 | -0.0004 |
| MDR-TB incidence per 100k                                                                          | -0.0041 | 0.0006 | 0.0000 | -0.0054 | -0.0029 |
| UHC service coverage index                                                                         | 0.2165  | 0.0651 | 0.0010 | 0.0913  | 0.3442  |
| Population living in slums (% of urban population)                                                 | 0.1766  | 0.0355 | 0.0000 | 0.1062  | 0.2465  |
| Diabetes prevalence (% of population aged >= 18 years)                                             | -0.0033 | 0.1199 | 0.9780 | -0.2330 | 0.2268  |
| Alcohol use disorders, 12-month prevalence (% of population aged >= 15 years)                      | -0.0113 | 0.1325 | 0.9320 | -0.2666 | 0.2567  |
| GINI index (0=perfect equality, 100=perfect inequality)                                            | 0.5938  | 0.0702 | 0.0000 | 0.4587  | 0.7344  |
| Population living below the international poverty line (% of population)                           | -0.3414 | 0.0741 | 0.0000 | -0.4827 | -0.1902 |
| Prevalence of undernourishment (% of population)                                                   | -0.7058 | 0.0780 | 0.0000 | -0.8569 | -0.5482 |
| HIV prevalence (adults 15-49)                                                                      | 0.3054  | 0.1636 | 0.0620 | -0.0186 | 0.6310  |

---
